# Supplementary material for: Glycosylation Site Alteration in the Evolution of Influenza A (H1N1) Viruses
Source: PLoS One. 2011 Jul 28;6(7):e22844. doi: 10.1371/journal.pone.0022844 (PMC3145772; doi:10.1371/journal.pone.0022844)
Supplement: Table S2 — The potential glycosylation sites of NA in H1N1 influenza viruses from different hosts. The sequence in each unit of table represents the corresponding sequon of each site. The potential glycosylation sites were highlighted by filling the units in yellow. (XLS) [file pone.0022844.s004.xls]

## Sheet: Human seasonal
Potential glycosites on NA in human seasonal influenza A/H1N1 viruses
	Potential glycosites
Location	Stalk						Head
Strains	44	50	58	63	68	70	88	146	151	235	248	365	386	434	455	Note	Time periods
A/United Kingdom/1/1933(H1N1)	NHT	NQG	---	---	---		NSS	NGA		NGS		DSS
A/WSN/1933(H1N1)	NHT	NQG	---	---	---		NSS	RGT		NGS		DSS				398NRS
A/NWS/1933(H1N1)	NHT	NQG	---	---	---		NSS	YGT		NGS		DSS
A/WS/1933(H1N1)	NHT	NQG	---	---	---		NSS	NGT		NGS		DSS
A/WSN/1933(H1N1)	NHT	NQG	---	---	---		NSS	RGT		NGS		DSS
A/Wilson-Smith/1933(H1N1)	NHT	NQG	---	---	---		NSS	NGT		NGS		DSS
A/Wilson-Smith/1933(H1N1)	NHT	NQG	---	---	---		NSS	KGT		NGS		DSS
A/WSN/1933(H1N1)	NHT	NQG	---	---	---		NSS	RGT		NGS		DSS
A/WSN/1933 TS61(H1N1)	NHT	NQG	---	---	---		NSS	RGT		NGS		DSS
A/Puerto Rico/8/1934(Cambridge)(H1N1)	NHT	NQN	NST	---	---		NSS	NGT		NGS		HSS
A/Puerto Rico/8/34/Mount Sinai(H1N1)	NHT	NQN	NST	---	---		NSS	NGT		NGS		HSS
A/Puerto Rico/8/1934(H1N1)	NHT	NQN	NST	---	---		NSS	SGT		NGS		HSS
A/Puerto Rico/8/1934(H1N1)	NHT	NQN	NST	---	---		NSS	SGT		NGS		HSS
A/Puerto Rico/8/1934(H1N1)	NHT	NQN	NST	---	---		NSS	SGT		NGS		HSS
A/Puerto Rico/8-SV14/1934(H1N1)	NHT	NQN	NST	---	---		NSS	SGT		NGS		HSS
A/Puerto Rico/8-1/1934(H1N1)	NHT	NQN	NST	---	---		NSS	SGT		NGS		HSS
A/Alaska/1935(H1N1)	NHT	NQN	NST	NQT	NIS		NSS	NGT		NGS		KSS
A/Melbourne/1935(H1N1)	---	---	-ST	---	---		NSS	SGT		NGS		HSS
A/Phila/1935(H1N1)	NHT	NQS	NST	NQT	NIS		NSS	NGT		NGS		TSS
A/Henry/1936(H1N1)	NHT	NQN	NST	NQT	NIS		NSS	NGT		NGS		NSS
A/Hickox/1940(H1N1)	NHT	NQS	NST	NQT	NIS		NSS	NGT		NGS		NSS			DWS
A/Bellamy/1942(H1N1)	NHT	NQS	NST	NQT	NIS		NSS	NGT		NGS		NSS			DWS
A/Weiss/1943(H1N1)	NHT	NQS	NST	NQT	NIS		NSS	NGT		NGS		NSS			DWS
A/Weiss/1943(H1N1)	NHT	NQS	NST	NQT	NIS		NSS	NGT		NGS		NSS			DWS
A/Marton/43(H1N1)	NHT	NQS	NST	NQT	NIS		NSS	NGT		NGS		NSS			DWS
A/Weiss/1943(H1N1)	NHT	NQS	NST	NQT	NIS		NSS	NGT		NGS		NSS			DWS
A/AA/Marton/1943(H1N1)	NHT	NQS	NST	NQT	NIS		NSS	NGT		NGS		NSS			DWS
A/Iowa/1943(H1N1)	NHT	NQS	NST	NQT	NIS		NSS	NGT		NGS		NSS			DWS
A/AA/Huston/1945(H1N1)	NHT	NQS	NST	NQT	NIS		NSS	NGT		NGS		NSS			DWS
A/Cameron/1946(H1N1)	--T	NRS	---	---	NIS		NSS	NGT		NGS		SSS			DWS
A/Melbourne/1/1946(H1N1)	---	---	-ST	NQT	NIS		NSS	NGT		NGS		QSS			DWS
A/Fort Monmouth/1/1947-mouse adapted(H1N1)	NHT	TQS	NST	NQT	---		NSS	NGT		NGS		NSS			DWS
A/Fort Monmouth/1/1947(H1N1)	NHT	TQS	NST	NQT	NIS		NSS	NGT		NGS		NSS			DWS
A/Rhodes/47(H1N1)	NHT	NQS	NST	NQT	NIS		NSS	NGT		NGS		NSS			DWS
A/Fort Monmouth/1/1947(H1N1)	NHT	NQS	NST	NQT	NIS		NSS	NGT		NGS		NSS			DWS
A/Fort Monmouth/1/1947(H1N1)	NHT	TQS	NST	NQT	---		NSS	NGT		NGS		NSS			DWS
A/Albany/4835/1948(H1N1)	NHT	NQR	NNT	NQT	NIS		NSS	NGT		NGS		NSS			NWS
A/Roma/1949(H1N1)	NHT	NQR	NNT	NQT	NIS		NSS	NGT		NGS		NSS			NWS
A/Fort Worth/1950(H1N1)	NHT	NRR	NNT	NQT	NIS		NSS	NGT		NGS		TSS			NWS
A/Albany/4836/1950(H1N1)	NHT	NQR	NNT	NQT	NIS		NSS	NGT		NGS		NSS			NWS
A/Albany/12/1951(H1N1)	NHT	NQR	NNT	NQT	NIS		NSS	NGT		NGS		NSS			NWS
A/Albany/1618/1951(H1N1)	NHT	NQR	NNT	NQT	NIS		NSS	NGT		NGS		NSS			NWS
A/Albany/14/1951(H1N1)	NHT	NQR	NNT	NQT	NIS		NSS	NGT		NGS		NSS			NWS
A/Albany/13/1951(H1N1)	NHT	NQR	NNT	NQT	NIS		NSS	NGT		NGS		NSS			NWS
A/Leningrad/1954/1(H1N1)	NHT	NQR	NST	NQT	NIS		NSS	NGT		NGS		NSS			NWS
A/Malaysia/1954(H1N1)	NHT	NQR	NNT	NQT	NIS		NSS	NGT		NGS		NSS			NWS
A/Malaya/302/1954(H1N1)	NHT	NQR	NNT	NQT	NIS		NSS	NGT		NGS		NSS			NWS
A/Denver/1957(H1N1)	NHT	NQR	NNT	NQT	NIS		NTS	NGT		NGS		NSS	NFS		NWS
A/New Jersey/8/1976(H1N1)	SHP	NQS	NNT	NQT	NIS	SNT	NSS	NGT		NGS		ISS	SFS		SWS
A/New Jersey/8/1976(H1N1)	SHP	NQS	NNT	NQT	NIS	SNT	NSS	NGT		NGS		ISS	SFS		SWS
A/New Jersey/1976(H1N1)	SHP	NQS	NNT	NQT	NIS	SNT	NSS	NGT		NGS		ISS	SFS		SWS
A/Wisconsin/301/1976(H1N1)	SHP	NQS	NNT	NQT	NIS	SNT	NSS	NGT		NGS		ISS	SFS		SWS
A/New Jersey/8/1976(H1N1)	SHP	NQS	NNT	NQT	NIS	SNT	NSS	NGT		NGS		ISS	SFS		SWS
A/New Jersey/11/1976(H1N1)	SHP	NQS	NNT	NQT	NIS	SNT	NSS	NGT		NGS		ISS	SFS		SWS
A/Hong Kong/117/1977(H1N1)	NHT	NQR	NST	NQT	NIS		NSS	NGT		NGS		NSS			NWS
A/USSR/92/1977(H1N1)	NHT	NQR	NST	NQT	NIS		NSS	NGT		NGS		NSS			NWS
A/USSR/90/1977(H1N1)	NHT	NQR	NST	NQT	NIS		NSS	NGT		NGS		NSS			NWS
A/USSR/90/1977(H1N1)	NHT	NQR	NST	NQT	NIS		NSS	NGT		NGS		NSS			NWS
A/USSR/90/1977(H1N1)	NHT	NQR	NST	NQT	NIS		NSS	NGT		NGS		NSS			NWS
A/Tientsin/78/1977(H1N1)	NHT	NQR	NST	NQT	NIS		NSS	NGT		NGS		NSS			NWS
A/Memphis/10/1978(H1N1)	NHT	NQR	NST	NQT	NIS		NSS	NGT		NGS		NSS			NWS
A/Memphis/11/1978(H1N1)	NHT	NQR	NST	NQT	NIS		NSS	NGT		NGS		NSS			NWS
A/Memphis/13/1978(H1N1)	NHT	NQR	NST	NQT	NIS		NSS	NGT		NGS		NSS			NWS
A/Memphis/15/1978(H1N1)	NHT	NQR	NST	NQT	NIS		NSS	NGT		NGS		NSS			NWS
A/Memphis/1/1978(H1N1)	NHT	NQR	NST	NQT	NIS		NSS	NGT		NGS		NSS			NWS
A/Memphis/17/1978(H1N1)	NHT	NQR	NST	NQT	NIS		NSS	NGT		NGS		NSS			NWS
A/Memphis/20/1978(H1N1)	NHT	NQR	NST	NQT	NIS		NSS	NGT		NGS		NSS			NWS
A/Arizona/14/1978(H1N1)	NHT	NQR	NST	NQT	NIS		NSS	NGT		NGS		NSS			NWS
A/Lackland/3/1978(H1N1)	NHT	NQR	NST	NQT	NIS		NSS	NGT		NGS		NSS			NWS
A/Lackland/7/1978(H1N1)	NHT	NQR	NST	NQT	NIS		NSS	NGT		NGS		NSS			NWS
A/Brazil/11/1978(H1N1)	NHT	NQR	NST	NQT	NIS		NSS	NGT		NGS		NSS			NWS
A/California/10/1978(H1N1)	NHT	NQR	NST	NQT	NIS		NSS	NGT		NGS		NSS			NWS
A/Albany/20/1978(H1N1)	NHT	NQR	NST	NQT	NIS		NSS	NGT		NGS		NSS			NWS
A/California/45/1978(H1N1)	NHT	NQR	NST	NQT	NIS		NSS	NGT		NGS		NSS			NWS
A/Kiev/59/1979(H1N1)	NHT	NQR	NST	NQT	NIS		NSS	NGT		NGS		NSS			NWS
A/Memphis/1/1979(H1N1)	NHT	NQR	NST	NQT	NIS		NSS	NGT		NGS		NSS			NWS
A/USSR/46/1979(H1N1)	NHT	NQR	NST	NQT	NIS		NSS	NGT		NGS		NSS			NWS
A/Albany/8/1979(H1N1)	NHT	NQR	NST	NQT	NIS		NSS	NGT		NGS		NSS			NWS
A/India/80(H1N1)	NHT	NQR	NST	NQT	NIN	NNT	NSS	NGT		NGS		NSS			NWS
A/Memphis/7/1980(H1N1)	NHT	NQR	NST	NQT	NIN	NNT	NSS	NGT		NGS		NSS			NWS
A/Maryland/2/1980(H1N1)	NHT	NQR	NST	NQT	NIS	SNT	NSS	NGT		NGS		NSS			NWS
A/India/6263/1980(H1N1)	NHT	NQR	NST	NQT	NIN	NNT	NSS	NGT		NGS		NSS			NWS
A/Baylor/4052/1981(H1N1)	NHT	NQR	NST	NQT	NIN	NNT	NSS	NGT		NGS		NSS			NWS
A/Baylor/11735/1982(H1N1)	NHT	NQR	NST	NQT	NIN	NNT	NSS	NGT		NGS		NSS			NWS
A/Baylor/11515/1982(H1N1)	NHT	NQR	NST	NQT	NIN	NNT	NSS	NGT		NGS		NSS			NWS
A/Chile/1/1983(H1N1)	NHT	NQR	NST	NQT	NIN	NNT	NSS	NGT		NGS		NSS			NWS
A/Christ's Hospital/157/1982(H1N1)	NHT	NQR	NST	NQT	NIN	NNT	NSS	NGT		NGS		NSS			NWS
A/Chile/1/1983(H1N1)	NHT	NQR	NST	NQT	NIN	NNT	NSS	NGT		NGS		NSS			NWS
A/Fiji/15899/83(H1N1)	NHT	NQR	NST	NQT	NIN	NNT	NSS	NGT		NGS		NSS			NWS
A/Memphis/3/1983(H1N1)	NHT	NQR	NST	NQT	NIN	NNT	NSS	NGT		NGS		NSS			NWS
A/Memphis/4/1983(H1N1)	NHT	NQR	NST	NQT	NIN	NNT	NSS	NGT		NGS		NSS			NWS
A/Memphis/7/1983(H1N1)	NHT	NQR	NST	NQT	NIN	NNT	NSS	NGT		NGS		NSS			NWS
A/Memphis/8/1983(H1N1)	NHT	NQR	NST	NQT	NIN	NNT	NSS	NGT		NGS		NSS			NWS
A/Memphis/12/1983(H1N1)	NHT	NQR	NST	NQT	NIN	NNT	NSS	NGT		NGS		NSS			NWS
A/Memphis/15/1983(H1N1)	NHT	NQR	NST	NQT	NIN	NNT	NSS	NGT		NGS		NSS			NWS
A/Memphis/17/1983(H1N1)	NHT	NQR	NST	NQT	NIN	NNT	NSS	NGT		NGS		NSS			NWS
A/Memphis/18/1983(H1N1)	NHT	NQR	NST	NQT	NIN	NNT	NSS	NGT		NGS		NSS			NWS
A/Memphis/11/1983(H1N1)	NHT	NQR	NST	NQT	NIN	NNT	NSS	NGT		NGS		NSS			NWS
A/Memphis/13/1983(H1N1)	NHT	NQR	NST	NQT	NIN	NNT	NSS	NGT		NGS		NSS			NWS
A/Memphis/19/1983(H1N1)	NHT	NQR	NST	NQT	NIN	NNT	NSS	NGT		NGS		NSS			NWS
A/Memphis/1/1983(H1N1)	NHT	NQR	NST	NQT	NIN	NNT	NSS	NGT		NGS		NSS			NWS
A/Memphis/2/1983(H1N1)	NHT	NQR	NST	NQT	NIN	NNT	NSS	NGT		NGS		NSS			NWS
A/Memphis/14/1983(H1N1)	NHT	NQR	NST	NQT	NIN	NNT	NSS	NGT		NGS		NSS			NWS
A/Memphis/10/1983(H1N1)	NHT	NQR	NST	NQT	NIN	NNT	NSS	NGT		NGS		NSS			NWS
A/Memphis/16/1983(H1N1)	NHT	NQR	NST	NQT	NIN	NNT	NSS	NGT		NGS		NSS			NWS
A/Memphis/6/1983(H1N1)	NHT	NQR	NST	NQT	NIN	NNT	NSS	NGT		NGS		NSS			NWS
A/Memphis/20/1983(H1N1)	NHT	NQR	NST	NQT	NIN	NNT	NSS	NGT		NGS		NSS			NWS
(A/Memphis/23/1983(H1N1)	NHT	NQR	NST	NQT	NIN	NNT	NSS	NGT		NGS		NSS			NWS
A/Memphis/24/1983(H1N1)	NHT	NQR	NST	NQT	NIN	NNT	NSS	NGT		NGS		NSS			NWS
A/Memphis/27/1983(H1N1)	NHT	NQR	NST	NQT	NIN	NNT	NSS	NGT		NGS		NSS			NWS
A/Memphis/28/1983(H1N1)	NHT	NQR	NST	NQT	NIN	NNT	NSS	NGT		NGS		NSS			NWS
A/Memphis/29/1983(H1N1)	NHT	NQR	NST	NQT	NIN	NNT	NSS	NGT		NGS		NSS			NWS
A/Memphis/30/1983(H1N1)	NHT	NQR	NST	NQT	NIN	NNT	NSS	NGT		NGS		NSS			NWS
A/Memphis/32/1983(H1N1)	NHT	NQR	NST	NQT	NIN	NNT	NSS	NGT		NGS		NSS			NWS
A/Memphis/21/1983(H1N1)	NHT	NQR	NST	NQT	NIN	NNT	NSS	NGT		NGS		NSS			NWS
A/Memphis/22/1983(H1N1)	NHT	NQR	NST	NQT	NIN	NNT	NSS	NGT		NGS		NSS			NWS
A/Memphis/26/1983(H1N1)	NHT	NQR	NST	NQT	NIN	NNT	NSS	NGT		NGS		NSS			NWS
A/Memphis/25/1983(H1N1)	NHT	NQR	NST	NQT	NIN	NNT	NSS	NGT		NGS		NSS			NWS
A/Memphis/35/1983(H1N1)	NHT	NQR	NST	NQT	NIN	NNT	NSS	NGT		NGS		NSS			NWS
A/Memphis/41/1983(H1N1)	NHT	NQR	NST	NQT	NIN	NNT	NSS	NGT		NGS		NSS			NWS
A/Memphis/40/1983(H1N1)	NHT	NQR	NST	NQT	NIN	NNT	NSS	NGT		NGS		NSS			NWS
A/Memphis/38/1983(H1N1)	NHT	NQR	NST	NQT	NIN	NNT	NSS	NGT		NGS		NSS			NWS
A/Memphis/42/1983(H1N1)	NHT	NQR	NST	NQT	NIN	NNT	NSS	NGT		NGS		NSS			NWS
A/Memphis/46/1983(H1N1)	NHT	NQR	NST	NQT	NIN	NNT	NSS	NGT		NGS		NSS			NWS
A/Memphis/48/1983(H1N1)	NHT	NQR	NST	NQT	NIN	NNT	NSS	NGT		NGS		NSS			NWS
A/Memphis/50/1983(H1N1)	NHT	NQR	NST	NQT	NIN	NNT	NSS	NGT		NGS		NSS			NWS
A/Memphis/51/1983(H1N1)	NHT	NQR	NST	NQT	NIN	NNT	NSS	NGT		NGS		NSS			NWS
A/Memphis/31/1983(H1N1)	NHT	NQR	NST	NQT	NIN	NNT	NSS	NGT		NGS		NSS			NWS
A/Memphis/47/1983(H1N1)	NHT	NQR	NST	NQT	NIN	NNT	NSS	NGT		NGS		NSS			NWS
A/Memphis/53/1983(H1N1)	NHT	NQR	NST	NQT	NIN	NNT	NSS	NGT		NGS		NSS			NWS
A/Memphis/49/1983(H1N1)	NHT	NQR	NST	NQT	NIN	NNT	NSS	NGT		NGS		NSS		KTT	NWS
A/Memphis/54/1983(H1N1)	NHT	NQR	NST	NQT	NIN	NNT	NSS	NGT		NGS		NSS		KTT	NWS
A/New Zealand/7/1983(H1N1)	NHT	NQR	NST	NQT	NIN	NNT	NSS	NGT		NGS		NSS		RTT	NWS
A/Memphis/39/1983(H1N1)	NHT	NQR	NST	NQT	NIN	NNT	NSS	NGT		NGS		NSS		KTT	NWS
(A/Chile/1/1983(H1N1)	NHT	NQR	NST	NQT	NIN	NNT	NSS	NGT		NGS		NSS		GTT	NWS
A/Memphis/44/1983(H1N1)	NHT	NQR	NST	NQT	NIN	NNT	NSS	NGT		NGS		NSS		KTT	NWS
A/Tonga/14/1984(H1N1)	NHT	NQR	NST	NQT	NIN	NNT	NSS	NGT		NGS		SSS		RTT	NWS
A/Memphis/1/1984(H1N1)	NHT	NQR	NST	NQT	NIN	NNT	NSS	NGT		NGS		NSS		RTT	NWS
A/Yamagata/120/1986(H1N1)	NYT	NQR	NST	NQT	NIN	NNT	NSS	NGT		NGS		NSS		NTT	NWS
A/Taiwan/01/1986(H1N1)	NYT	NQR	NST	NQT	NIN	NNT	NSS	NGT		NGS		NSS		NTT	NWS
A/Memphis/12/1986(H1N1)	NYT	NQR	NST	NQT	NIN	NNT	NSS	NGT		NGS		NSS		NTT	NWS
A/Singapore/6/1986(H1N1)	NYT	NQR	NST	NQT	NIN	NNT	NSS	NGT		NGS		NSS		NTT	NWS
A/Texas/2922-3/1986(H1N1)	NYT	NQR	NST	NQT	NIN	NNT	NSS	NGT		NGS		NSS		NTT	NWS
A/New York/2924-1/1986(H1N1)	NYT	NQR	NST	NQT	NIN	NNT	NSS	NGT		NGS		NSS		NTT	NWS
A/Memphis/3/1987(H1N1)	NYT	NQR	NST	NQT	NIN	NNT	NSS	NGT		NGS		NSS		NTT	NWS
A/Memphis/4/1987(H1N1)	NYT	NQR	NST	NQT	NIN	NNT	NSS	NGT		NGS		NSS		NTT	NWS
A/Memphis/1/1987(H1N1)	NYT	NQR	NST	NQT	NIN	NNT	NSS	NGT		NGS		NSS		NTT	NWS	40NGS
A/Siena/4/1987(H1N1)	NYT	NQR	NST	NQT	NIN	NNT	NSS	NGT		NGS		NSS		NTT	NWS
A/Hokkaido/11/1988(H1N1)	NHT	NQR	NST	NQT	NIN	NNT	NSS	NGT		NGS		NRF		NTT	NWS
A/Ohio/3559/1988(H1N1)	NHS	SQN	NST	NQT	NIN	NNT	NSS	NGT		NGS		ISS		-ST	SWS
A/Siena/9/1989(H1N1)	NHT	NQR	NST	NQT	NIN	NNT	NSS	NGT		NGS		NRF		NTT	NWS
A/Siena/10/1989(H1N1)	NHT	NQR	NST	NQT	NIN	NNT	NSS	NGT		NGS		NRF		NTT	NWS
A/Yamagata/32/1989(H1N1)	NHT	NQR	NST	NQT	NIN	NNT	NSS	NGT		NGS		NRF		NTT	NWS
A/Texas/36/1991(H1N1)	NHT	NQR	NST	NQT		NNT	NSS	NGT		NGS				NTT	NWS
A/Texas/36/1991(H1N1)	NHT	NQR	NST	NQT		NNT	NSS	NGT		NGS				NTT	NWS
A/Texas/36/1991(H1N1)	NHT	NQR	NST	NQT		NNT	NSS	NGT		NGS				NTT	NWS
A/Maryland/12/1991(H1N1)	NHT	NQN	NST	NQT	NIS	SNT	NSS	NGT		NGS				-ST	SWS
A/Hokkaido/2/1992(H1N1)	NHT	NQR	NST	NQT		NNT	NSS	NGT		NGS				KTT	NWS
A/Wisconsin/4754/1994(H1N1)	NHP	SQN	NNT	NQT	NIS	SNT	NSS	NGT		NGS				NTT	SWS
A/New York/694/1995(H1N1)	NHT	NQR	NST	NQT		NNT	NSS	NGT		NGS				NTT	NWS
A/New York/656/1995(H1N1)	NHT	NQR	NST	NQT		NNT	NSS	NGT		NGS				NAT	NWS
A/New York/604/1995(H1N1)	NHT	NQR	NST	NQT		NNT	NSS	NGT		NGS				NTT	NWS
A/New York/627/1995(H1N1)	NHT	NQR	NST	NQT		NNT	NSS	NGT		NGS				NTT	NWS
A/New York/644/1995(H1N1)	NHT	NQR	NST	NQT		NNT	NSS	NGT		NGS				NTT	NWS
A/New York/615/1995(H1N1)	NHT	NQR	NST	NQT		NNT	NSS	NGT		NGS				NTT	NWS
A/New York/651/1995(H1N1)	NHT	NQR	NST	NQT		NNT	NSS	NGT		NGS				NTT	NWS
A/New York/629/1995(H1N1)	NHT	NQR	NST	NQT		NNT	NSS	NGT		NGS				NTT	NWS
A/New York/638/1995(H1N1)	NHT	NQR	NST	NQT		NNT	NSS	NGT		NGS				NTT	NWS
A/New York/607/1995(H1N1)	NHT	NQR	NST	NQT		NNT	NSS	NGT		NGS				NTT	NWS
A/New York/643/1995(H1N1)	NHT	NQR	NST	NQT		NNT	NSS	NGT		NGS				NTT	NWS
A/New York/649/1995(H1N1)	NHT	NQR	NST	NQT		NNT	NSS	NGT		NGS				NTT	NWS
A/New York/645/1995(H1N1)	NHT	NQR	NST	NQT		NNT	NSS	NGT		NGS				NTT	NWS
A/New York/614/1995(H1N1)	NHT	NQR	NST	NQT		NNT	NSS	NGT		NGS				NTT	NWS
A/New York/605/1995(H1N1)	NHT	NQR	NST	NQT		NNT	NSS	NGT		NGS				NTT	NWS
A/New York/650/1995(H1N1)	NHT	NQR	NST	NQT		NNTS	NSS	NGT		NGS				NTT	NWS
A/New York/633/1995(H1N1)	NHT	NQR	NST	NQT		NNT	NSS	NGT		NGS				NTT	NWS
A/New York/616/1995(H1N1)	NHT	NQR	NST	NQT		NNT	NSS	NGT		NGS				NTT	NWS
A/Siena/14/1995(H1N1)	NHT	NQR	NST	NQT		NNT	NSS	NGT		NSS				NTT	NWS
A/New York/620/1995(H1N1)	NHT	NQR	NST	NQT		NNT	NSS	NGT		NGS				NTT	NWS
A/New York/621/1995(H1N1)	NHT	NQR	NST	NQT		NNT	NSS	NGT		NGS				NTT	DWS
A/New York/642/1995(H1N1)	NHT	NQR	NST	NQT		NNT	NSS	NGT		NGS				NTT	NWS
A/New York/630/1995(H1N1)	NHT	NQR	NST	NQT		NNT	NSS	NGT		NGS				NTT	NWS
A/Charlottesville/31/95(H1N1)	NHT	NQR	DST	NQT		NNT	NSS	NGT		NGS				NTT	NWS
A/Charlottesville/31/95(H1N1)	NHT	NQR	NST	NQT		NNT	NSS	NGT		NGS				NTT	NWS
A/Charlottesville/28/95(H1N1)	NHT	NQR	NST	NQT		NNT	NSS	NGT		NGS				NTT	NWS
A/Wuhan/371/95(H1N1)	NHT	NQR	NST	NHT		NNT	NSS	NGT		NGS				NTT	NWS
A/Bayern/7/1995(H1N1)	NHT	NQR	NST	NQT		NNT	NSS	NGT		NGS				NTT	NWS
A/Beijing/262/1995(H1N1)	NHT	NQR	NST	NHT		NNT	NSS	NGT		NGS				NTT	NWS
A/New York/653/1996(H1N1)	NHT	NQR	NST	NQT		NNT	NSS	NGT		NGS				NTT	NWS
A/New York/640/1996(H1N1)	NHT	NQR	NST	NQT		NNT	NSS	NGT		NGS				NTT	NWS
A/New York/646/1996(H1N1)	NHT	NQR	NST	NQT		NNT	NSS	NGT		NGS				NTT	NWS
A/New York/626/1996(H1N1)	NHT	NQR	NST	NQT		NNT	NSS	NGT		NGS				NTT	NWS
A/Johannesburg/82/96(H1N1)	NHT	NQR	NST	NQT		NNT	NSS	NGT		NGS				NTT	NWS
A/Taiwan/117/1996(H1N1)	NHT	NQK	NST	NQT		NNT	NSS	NGT		NGS				NTT	NWS
A/TW/130/1996(H1N1)	NHT	NQK	NST	NQT		NNT	NSS	NGT		NGS				NTT	NWS
A/Nanchang/13/1996(H1N1)	NHT	NQR	NST	NHT		NNT	NSS	NGT		NGS				NTT	NWS
A/Nanchang/15/1996(H1N1)	NHT	NQR	NST	NHT		NNT	NSS	NGT		NGS				NTT	NWS
A/Nanchang/16/1996(H1N1)	NHT	NQR	NST	NHT		NNT	NSS	NGT		NGS				NTT	NWS
A/Nanchang/17/1996(H1N1)	NHT	NQR	NST	NHT		NNT	NSS	NGT		NGS				NTT	NWS
(A/Nanchang/19/1996(H1N1)	NHT	NQR	NST	NHT		NNT	NSS	NGT		NGS				NTT	NWS
A/Nanchang/26/1996(H1N1)	NHT	NQR	NST	NHT		NNT	NSS	NGT		NGS				NTT	NWS
A/Nanchang/21/1996(H1N1)	NHT	NQR	NST	NHT		NNT	NSS	NGT		NGS				NTT	NWS
A/Nanchang/8/1996(H1N1)	NHT	NQR	NST	NHT		NNT	NSS	NGT		NGS				NTT	NWS
A/Nanchang/11/1996(H1N1)	NHT	NQR	NST	NHT		NNT	NSS	NGT		NGS				NTT	NWS
A/Nanchang/23/1996(H1N1)	NHT	NQR	NST	NHT		NNT	NSS	NGT		NGS				NTT	NWS
A/Nanchang/25/1996(H1N1)	NHT	NQR	NST	NHT		NNT	NSS	NGT		NGS				NTT	NWS
A/Nanchang/9/1996(H1N1)	NHT	NQR	NST	NHT		NNT	NSS	NGT		NGS				NTT	NWS
A/Nanchang/14/1996(H1N1)	NHT	NQR	NST	NHT		NNT	NSS	NGT		NGS				NTT	NWS
A/Memphis/2/1996(H1N1)	NHT	NQR	NST	NQT		NNT	NSS	NGT		NGS				NTT	NWS
A/Memphis/3/1996(H1N1)	NHT	NQR	NST	NQT		NNT	NSS	NGT		NGS				NTT	NWS
A/Memphis/5/1996(H1N1)	NHT	NQR	NST	NQT		NNT	NSS	NGT		NGS				NTT	NWS
A/Memphis/7/1996(H1N1)	NHT	NQR	NST	NQT		NNT	NSS	NGT		NGS				NTT	NWS
A/Memphis/6/1996(H1N1)	NHT	NQR	NST	NQT		NNT	NSS	NGT		NGS				NTT	NWS
A/Memphis/10/1996(H1N1)	NHT	NQR	NST	NQT		NNT	NSS	NGT		NGS				NTT	NWS
A/Memphis/11/1996(H1N1)	NHT	NQR	NST	NQT		NNT	NSS	NGT		NGS				NTT	NWS
A/Memphis/13/1996(H1N1)	NHT	NQR	NST	NQT		NNT	NSS	NGT		NGS				NTT	NWS
A/Memphis/14/1996(H1N1)	NHT	NQR	NST	NQT		NNT	NSS	NGT		NGS				NTT	NWS
A/Memphis/15/1996(H1N1)	NHT	NQR	NST	NQT		NNT	NSS	NGT		NGS				NTT	NWS
A/Auckland/6/1996(H1N1)	NHT	NQR	NST	NQT		NNT	NSS	NGT		NGS				NTT	NWS
A/Johannesburg/159/97(H1N1)	NHT	NQR	NST	NHT		NNT	NSS	NGT		NGS				NTT	NWS
A/TW/3355/1997(H1N1)	NHT	NQR	NST	NHT		NNT	NSS	NGT		NGS				NTT	NWS
A/Neimenggu/63/1997(H1N1)	NHT	NQR	NST	NQT		NNT	NSS	NGT		NGS				NTT	NWS
A/Taiwan/1348/1997(H1N1)	NHT	NQR	NST	NHT		NNT	NSS	NGT		NGS				NTT	NWS
A/Austria/262/1997(H1N1)	NHT	NQR	NST	NQT		NNT	NSS	NGT		NGS				NTT	NWS
A/Durbin/113/1997(H1N1)	NHT	NQR	NST	NQT		NNT	NSS	NGT		NGS				NTT	NWS
A/Brazil/199/1997(H1N1)	NHT	NQR	NST	NQT		NNT	NSS	NGT		NGS				NTT	DWS
A/Hong Kong/364/1997(H1N1)	NHT	NQR	NST	NHT		NNT	NSS	NGT		NGS				NTT	NWS
A/Wuhan/100/1997(H1N1)	NHT	NQR	NST	NHT		NNT	NSS	NGT		NGS				NTT	NWS
A/Wisconsin/10/1998(H1N1)	NYS	SKS	NST	NQT	NIS	SNI	NSS	NGT		NGS				-ST	SWS
A/Oslo/734/98(H1N1)	NYT	NQR	NST	NQT		NNT	NSS	NGT		NGS				NTT	NWS
A/Nanchang/4/1998(H1N1)	NHT	NQR	NST	NHT		NNT	NSS	NGT		NGS				NTT	NWS
A/Neimenggu/36/1998(H1N1)	NHT	NQR	NST	NHT		NNT	NSS	NGT		NGS				NTT	NWS
A/New Caledonia/20/1999(H1N1)	NHT	NQR	NST	NHT		NNT	NSS	NGT		NGS				NTT	NWS
A/New Caledonia/20/1999(H1N1)	NHT	NQR	NST	NHT		NNT	NSS	NGT		NGS				NTT	NWS
A/New Caledonia/20/1999(H1N1)	NHT	NQR	NST	NHT		NNT	NSS	NGT		NGS				NTT	NWS
A/Taiwan/929/99(H1N1)	NHT	NQR	NNT	NHT		NNT	NSS	NGT		NGS				NTT	NWS
A/TW/4845/1999(H1N1)	NHT	NQR	NNT	NHT		NNT	NSS	NGT		NGS				NTT	NWS
A/New Caledonia/20/1999(H1N1)	NHT	NQR	NST	NHT		NNT	NSS	NGT		NGS				NTT	NWS
A/New South Wales/18/1999(H1N1)	NHT	NQR	NST	NHT		NNT	NSS	NGT		NGS				NTT	NWS
A/New South Wales/24/1999(H1N1)	NHT	NQR	NST	NHT		NNT	NSS	NGT		NGS				NTT	NWS
A/New Caledonia/20/1999(H1N1)	NHT	NQR	NST	NHT		NNT	NSS	NGT		NGS				NTT	NWS
A/Taiwan/5072/1999(H1N1)	NHT	NQR	NNT	NHT		NNT	NSS	NGT		NGS				NTT	NWS
A/Auckland/579/2000(H1N1)	NHT		NST	NHT	NIN	NNT	NSS	NGT		NGS			NFS	NTT	NWS
A/Auckland/580/2000(H1N1)	NHT		NST	NHT	NIN	NNT	NSS	NGT		NGS				NTT	NWS
A/Auckland/581/2000(H1N1)	NHT		NST	NHT	NIN	NNT	NSS	NGT		NGS			NFS	NTT	NWS
A/Auckland/582/2000(H1N1)	NHT		NST	NHT	NIN	NNT	NSS	NGT		NGS			NFS	NTT	NWS
A/Auckland/584/2000(H1N1)	NHT		NST	NHT	NIN	NNT	NSS	NGT		NGS			NFS	NTT	NWS
A/Auckland/585/2000(H1N1)	NHT		NST	NHT	NIN	NNT	NSS	NGT		NGS			NFS	NTT	NWS
A/Auckland/586/2000(H1N1)	NHT		NST	NHT	NIN	NNT	NSS	NGT		NGS			NFS	NTT	NWS
A/Auckland/587/2000(H1N1)	NHT		NST	NHT	NIN	NNT	NSS	NGT		NGS			NFS	NTT	NWS
A/Auckland/590/2000(H1N1)	NHT		NST	NHT	NIN	NNT	NSS	NGT		NGS			NFS	NTT	NWS
A/Auckland/591/2000(H1N1)	NHT		NST	NHT	NIN	NNT	NSS	NGT		NGS			NFS	NTT	NWS
A/Auckland/595/2000(H1N1)	NHT		NST	NHT	NIN	NNT	NSS	NGT		NGS			NFS	NTT	NWS
A/Auckland/597/2000(H1N1)	NHT		NST	NHT	NIN	NNT	NSS	NGT		NGS			NFS	NTT	NWS
A/Bratislava/47/2000(H1N1)	NHT		NST	NHT	NIN	NNT	NSS	NGT		NGS				NTT	NWS
A/Canterbury/100/2000(H1N1)	NHT		NST	NHT	NIN	NNT	NSS	NGT		NGS			NFS	NTT	NWS
A/Canterbury/23/2000(H1N1)	NHT		NST	NHT	NIN	NNT	NSS	NGT		NGS			NFS	NTT	NWS
A/Canterbury/27/2000(H1N1)	NHT		NST	NNT	NIN	NNT	NSS	NGT		NGS				NTT	NWS
A/Canterbury/28/2000(H1N1)	NHT		NST	NHT	NIN	NNT	NSS	NGT		NGS			NFS	NTT	NWS
A/Canterbury/30/2000(H1N1)	NHT		NST	NHT	NIN	NNT	NSS	NGT		NGS			NFS	NTT	NWS
A/Canterbury/32/2000(H1N1)	NHT		NST	NHT	NIN	NNT	NSS	NGT		NGS			NFS	NTT	NWS
A/Canterbury/33/2000(H1N1)	NHT		NST	NHT	NIN	NNT	NSS	NGT		NGS			NFS	NTT	NWS
A/Canterbury/34/2000(H1N1)	NHT		NST	NHT	NIN	NNT	NSS	NGT		NGS			NFS	NTT	NWS
A/Canterbury/36/2000(H1N1)	NHT		NST	NHT	NIN	NNT	NSS	NGT		NGS			NFS	NTT	NWS
A/Canterbury/37/2000(H1N1)	NHT		NST	NHT	NIN	NNT	NSS	NGT		NGS			NFS	NTT	NWS
A/Canterbury/41/2000(H1N1)	NNT		NST	NHT	NIN	NNT	NSS	NGT		NGS			NFS	NTT	NWS
A/Canterbury/43/2000(H1N1)	NHT		NST	NHT	NIN	NNT	NSS	NGT		NGS			NFS	NTT	NWS
A/Canterbury/48/2000(H1N1)	NHT		NST	NHT	NIN	NNT	NSS	NGT		NGS			NFS	NTT	NWS
A/Canterbury/5/2000(H1N1)	NHT		NST	NHT	NIN	NNT	NSS	NGT		NGS			NFS	NTT	NWS
A/Canterbury/51/2000(H1N1)	NHT		NST	NHT	NIN	NNT	NSS	NGT		NGS			NFS	NTT	NWS
A/Canterbury/54/2000(H1N1)	NHT		NST	NHT	NIN	NNT	NSS	NGT		NGS			NFS	NTT	NWS
A/Canterbury/55/2000(H1N1)	NHT		NST	NHT	NIN	NNT	NSS	NGT		NGS			NFS	NTT	NWS
A/Canterbury/57/2000(H1N1)	NHT		NST	NHT	NIN	NNT	NSS	NGT		NGS			NFS	NTT	NWS
A/Canterbury/58/2000(H1N1)	NHT		NST	NHT	NIN	NNT	NSS	NGT		NGS			NFS	NTT	NWS
A/Canterbury/60/2000(H1N1)	NHT		NST	NHT	NIN	NNT	NSS	NGT		NGS			NFS	NTT	NWS
A/Canterbury/63/2000(H1N1)	NHT		NST	NHT	NIN	NNT	NSS	NGT		NGS				NTT	NWS
A/Canterbury/65/2000(H1N1)	NHT		NST	NNT	NIN	NNT	NSS	NGT		NGS			NFS	NTT	NWS
A/Canterbury/7/2000(H1N1)	NHT		NNT	NHT	NIN	NNT	NSS	NGT		NGS			NFS	NTT	NWS
A/Canterbury/76/2000(H1N1)	NHT		NST	NHT	NIN	NNT	NSS	NGT		NGS			NFS	NTT	NWS
A/Canterbury/78/2000(H1N1)	NHT		NST	NHT	NIN	NNT	NSS	NGT		NGS			NFS	NTT	NWS
A/Canterbury/79/2000(H1N1)	NHT		NST	NHT	NIN	NNT	NSS	NGT		NGS			NFS	NTT	NWS
A/Canterbury/8/2000(H1N1)	NHT		NST	NHT	NIN	NNT	NSS	NGT		NGS			NFS	NTT	NWS
A/Canterbury/87/2000(H1N1)	NHT		NST	NHT	NIN	NNT	NSS	NGT		NGS			NFS	NTT	NWS
A/Canterbury/9/2000(H1N1)	NHT		NST	NHT	NIN	NNT	NSS	NGT		NGS			NFS	NTT	NWS
A/Canterbury/95/2000(H1N1)	NHT		NNT	NHT	NIN	NNT	NSS	NGT		NGS			NFS	NTT	NWS
A/Denmark/40/2000(H1N1)	NHT		NST	NHT	NIN	NNT	NSS	NGT		NGS				NTT	NWS
A/Denmark/40/2000(H1N1)	NHT		NST	NHT	NIN	NNT	NSS	NGT		NGS			NFS	NTT	NWS
A/Dunedin/2/2000(H1N1)	NHT		NST	NHT	NIN	NNT	NSS	NGT		NGS			NFS	NTT	NWS
A/Memphis/15/2000(H1N1)	NHT		NST	NHT	NIN	NNT	NSS	NGT		NGS				NTT	NWS
A/New South Wales/26/2000(H1N1)	NHT		NST	NHT	NIN	NNT	NSS	NGT	NRS	NGS				NTT	NWS
A/New South Wales/30/2000(H1N1)	NHT		NST	NHT	NIN	NNT	NSS	NGT		NGS				NTT	NWS
A/New York/146/2000(H1N1)	NYT		NST	NQT	NIN	NNT	NSS	NGT		NGS				NTT	NWS
A/New York/233/2000(H1N1)	NHT		NST	NHT	NIN	NNT	NSS	NGT		NGS				NTT	NWS
A/New York/234/2000(H1N1)	NHT		NST	NHT	NIN	NNT	NSS	NGT		NGS				NTT	NWS
A/South Australia/25/2000(H1N1)	NYT		NRT	NQT	NIN	NNT	NSS	NGT		NGS				NTT	NWS
A/South Australia/26/2000(H1N1)	NYT		NRT	NQT	NIN	NNT	NSS	NGT		NGS				NTT	NWS
A/South Australia/29/2000(H1N1)	NHT		NST	NHT	NIN	NNT	NSS	NGT		NGS				NTT	NWS	307NQS
A/South Australia/30/2000(H1N1)	NYT		NRT	NQT	NIN	NNT	NSS	NGT		NGS				NTT	NWS
A/South Australia/36/2000(H1N1)	NHT		NST	NHT	NIN	NNT	NSS	NGT		NGS				NTT	NWS
A/South Australia/39/2000(H1N1)	NHT		NST	NHT	NIN	NNT	NSS	NGT		NGS				NTT	NWS
A/South Australia/40/2000(H1N1)	NYT		NRT	NQT	NIN	NNT	NSS	NGT		NGS				NTT	NWS
A/South Australia/44/2000(H1N1)	NYT		NRT	NQT	NIN	NNT	NSS	NGT		NGS				NTT	NWS
A/South Australia/45/2000(H1N1)	NYT		NRT	NQT	NIN	NNT	NSS	NGT		NGS				NTT	NWS
A/South Australia/46/2000(H1N1)	NYT		NRT	NQT	NIN	NNT	NSS	NGT		NGS				NTT	NWS
A/South Australia/63/2000(H1N1)	NYT		NRT	NQT	NIN	NNT	NSS	NGT		NGS				NTT	NWS
A/South Australia/64/2000(H1N1)	NHT		NST	NHT	NIN	NNT	NSS	NGT		NGS				NTT	NWS
A/South Canterbury/31/2000(H1N1)	NHT		NST	NHT	NIN	NNT	NSS	NGT		NGS			NFS	NTT	NWS
A/South Canterbury/35/2000(H1N1)	NHT		NST	NHT	NIN	NNT	NSS	NGT		NGS			NFS	NTT	NWS
A/South Canterbury/40/2000(H1N1)	NHT		NST	NHT	NIN	NNT	NSS	NGT		NGS			NFS	NTT	NWS
A/South Canterbury/50/2000(H1N1)	NHT		NST	NHT	NIN	NNT	NSS	NGT		NGS			NFS	NTT	NWS
A/South Canterbury/59/2000(H1N1)	NHT		NST	NHT	NIN	NNT	NSS	NRT		NGS			NFS	NTT	NWS
A/Waikato/18/2000(H1N1)	NHT		NST	NHT	NIN	NNT	NSS	NGT		NGS			NFS	NTT	NWS
A/Waikato/19/2000(H1N1)	NHT		NST	NHT	NIN	NNT	NSS	NGT		NGS			NFS	NTT	NWS
A/Wellington/11/2000(H1N1)	NHT		NST	NHT	NIN	NNT	NSS	NGT		NGS			NFS	NTT	NWS
A/Wellington/14/2000(H1N1)	NHT		NST	NHT	NIN	NNT	NSS	NGT		NGS			NFS	NTT	NWS
A/Wellington/16/2000(H1N1)	NHT		NST	NHT	NIN	NNT	NSS	NGT		NGS			NFS	NTT	NWS
A/Wellington/18/2000(H1N1)	NHT		NST	NHT	NIN	NNT	NSS	NGT		NGS			NFS	NTT	NWS
A/Wellington/2/2000(H1N1)	NHT		NST	NHT	NIN	NNT	NSS	NGT		NGS			NFS	NTT	NWS
A/Wellington/24/2000(H1N1)	NHT		NST	NHT	NIN	NNT	NSS	NGT		NGS			NFS	NTT	NWS
A/Wellington/3/2000(H1N1)	NHT		NST	NHT	NIN	NNT	NSS	NGT		NGS			NFS	NTT	NWS
A/Wellington/4/2000(H1N1)	NHT		NST	NHT	NIN	NNT	NSS	NGT		NGS			NFS	NTT	NWS
A/Wellington/5/2000(H1N1)	NHT		NST	NHT	NIN	NNT	NSS	NGT		NGS			NFS	NTT	NWS
A/Wellington/6/2000(H1N1)	NHT		NST	NHT	NIN	NNT	NSS	NGT		NGS			NFS	NTT	NWS
A/Wellington/7/2000(H1N1)	NHT		NST	NHT	NIN	NNT	NSS	NGT		NGS				NTT	NWS
(A/Canterbury/34/2001(H1N1)	NHT		NST	NHT	NIN	NNT	NSS	NGT		NGS				NTT	NWS
(A/Canterbury/74/2001(H1N1)	NHT		NST	NHT	NIN	NNT	NSS	NGT		NGS				NTT	NWS
(A/New York/305/2001(H1N1)	NHT		NST	NHT	NIN	NNT	NSS	NGT		NGS				NTT	NWS
A/Auckland/605/2001(H1N1)	NHT		NST	NHT	NIN	NNT	NSS	NGT		NGS				NTT	NWS
A/Auckland/606/2001(H1N1)	NHT		NST	NHT	NIN	NNT	NSS	NGT		NGS				NTT	NWS
A/Canterbury/01/2001(H1N1)	NHT		NST	NHT	NIN	NNT	NSS	NGT		NGS				NTT	NWS
A/Canterbury/05/2001(H1N1)	NHT		NST	NHT	NIN	NNT	NSS	NGT		NGS				NTT	NWS
A/Canterbury/08/2001(H1N1)	NHT		NST	NHT	NIN	NNT	NSS	NGT		NGS				NTT	NWS
A/Canterbury/106/2001(H1N1)	NHT		NST	NHT	NIN	NNT	NSS	NGT		NGS				NTT	NWS
A/Canterbury/119/2001(H1N1)	NHT		NST	NHT	NIN	NNT	NSS	NGT		NGS				NTT	NWS
A/Canterbury/125/2001(H1N1)	NHT		NST	NHT	NIN	NNT	NSS	NGT		NGS				NTT	NWS
A/Canterbury/126/2001(H1N1)	NHT		NST	NHT	NIN	NNT	NSS	NGT		NGS				NTT	NWS
A/Canterbury/139/2001(H1N1)	NHT		NST	NHT	NIN	NNT	NSS	NGT		NGS				NTT	NWS
A/Canterbury/144/2001(H1N1)	NHT		NST	NHT	NIN	NNT	NSS	NGT		NGS				NTT	NWS
A/Canterbury/152/2001(H1N1)	NHT		NST	NHT	NIN	NNT	NSS	NGT		NGS				NTT	NWS
A/Canterbury/153/2001(H1N1)	NHT		NST	NHT	NIN	NNT	NSS	NGT		NGS				NTT	NWS
A/Canterbury/155/2001(H1N1)	NHT		NST	NHT	NIN	NNT	NSS	NGT		NGS				NTT	NWS
A/Canterbury/16/2001(H1N1)	NHT		NST	NHT	NIN	NNT	NSS	NGT		NGS				NTT	NWS
A/Canterbury/17/2001(H1N1)	NHT		NST	NHT	NIN	NNT	NSS	NGT		NGS				NTT	NWS
A/Canterbury/19/2001(H1N1)	NHT		NST	NHT	NIN	NNT	NSS	NGT		NGS				NTT	NWS
A/Canterbury/20/2001(H1N1)	NHT		NST	NHT	NIN	NNT	NSS	NGT		NGS				NTT	NWS
A/Canterbury/21/2001(H1N1)	NHT		NST	NHT	NIN	NNT	NSS	NGT		NGS				NTT	NWS
A/Canterbury/22/2001(H1N1)	NHT		NST	NHT	NIN	NNT	NSS	NGT		NGS				NTT	NWS
A/Canterbury/23/2001(H1N1)	NHT		NST	NHT	NIN	NNT	NSS	NGT		NGS				NTT	NWS
A/Canterbury/24/2001(H1N1)	NHT		NST	NHT	NIN	NNT	NSS	NGT		NGS				NTT	NWS
A/Canterbury/25/2001(H1N1)	NHT		NST	NHT	NIN	NNT	NSS	NGT		NGS				NTT	NWS
A/Canterbury/26/2001(H1N1)	NHT		NST	NHT	NIN	NNT	NSS	NGT		NGS				NTT	NWS
A/Canterbury/27/2001(H1N1)	NHT		NST	NHT	NIN	NNT	NSS	NGT		NGS				NTT	NWS
A/Canterbury/29/2001(H1N1)	NHT		NST	NHT	NIN	NNT	NSS	NGT		NGS				NTT	NWS
A/Canterbury/30/2001(H1N1)	NHT		NST	NHT	NIN	NNT	NSS	NGT		NGS				NTT	NWS
A/Canterbury/35/2001(H1N1)	NHT		NST	NHT	NIN	NNT	NSS	NGT		NGS				NTT	NWS
A/Canterbury/40/2001(H1N1)	NHT		NST	NHT	NIN	NNT	NSS	NGT		NGS				NTT	NWS
A/Canterbury/41/2001(H1N1)	NHT		NST	NHT	NIN	NNT	NSS	NGT		NGS				NTT	NWS
A/Canterbury/42/2001(H1N1)	NHT		NST	NHT	NIN	NNT	NSS	NGT		NGS				NTT	NWS
A/Canterbury/45/2001(H1N1)	NHT		NST	NHT	NIN	NNT	NSS	NGT		NGS				NTT	NWS
A/Canterbury/47/2001(H1N1)	NHT		NST	NHT	NIN	NNT	NSS	NGT		NGS				NTT	NWS
A/Canterbury/48/2001(H1N1)	NHT		NST	NHT	NIN	NNT	NSS	NGT		NGS				NTT	NWS
A/Canterbury/51/2001(H1N1)	NHT		NST	NHT	NIN	NNT	NSS	NGT		NGS				NTT	NWS
A/Canterbury/54/2001(H1N1)	NHT		NST	NHT	NIN	NNT	NSS	NGT		NGS				NTT	NWS
A/Canterbury/58/2001(H1N1)	NHT		NST	NHT	NIN	NNT	NSS	NGT		NGS				NTT	NWS
A/Canterbury/60/2001(H1N1)	NHT		NST	NHT	NIN	NNT	NSS	NGT		NGS				NTT	NWS
A/Canterbury/63/2001(H1N1)	NHT		NST	NHT	NIN	NNT	NSS	NGT		NGS				NTT	NWS
A/Canterbury/64/2001(H1N1)	NHT		NST	NHT	NIN	NNT	NSS	NGT		NGS				NTT	NWS
A/Canterbury/65/2001(H1N1)	NYT		NRT	NQT	NIN	NNT	NSS	NGT		NGS				NTT	NWS
A/Canterbury/66/2001(H1N1)	NHT		NST	NNT	NIN	NNT	NSS	NGT		NGS				NTT	NWS
A/Canterbury/68/2001(H1N1)	NHT		NST	NHT	NIN	NNT	NSS	NGT		NGS				NTT	NWS
A/Canterbury/69/2001(H1N1)	NHT		NST	NHT	NIN	NNT	NSS	NGT		NGS				NTT	NWS
A/Canterbury/70/2001(H1N1)	NHT		NST	NHT	NIN	NNT	NSS	NGT		NGS				NTT	NWS
A/Canterbury/71/2001(H1N1)	NHT		NST	NHT	NIN	NNT	NSS	NGT		NGS				NTT	NWS
A/Canterbury/72/2001(H1N1)	NHT		NST	NHT	NIN	NNT	NSS	NGT		NGS				NTT	NWS
A/Canterbury/73/2001(H1N1)	NHT		NST	NHT	NIN	NNT	NSS	NGT		NGS				NTT	NWS
A/Canterbury/76/2001(H1N1)	NHT		NST	NHT	NIN	NNT	NSS	NGT		NGS				NTT	NWS
A/Canterbury/79/2001(H1N1)	NHT		NST	NHT	NIN	NNT	NSS	NGT		NGS				NTT	NWS
A/Denmark/11/2001(H1N1)	NHT		NST	NHT	NIN	NNT	NSS	NGT		NGS				NTT	NWS
A/Denmark/14/2001(H1N1)	NHT		NST	NHT	NIN	NNT	NSS	NGT		NGS				NTT	NWS
A/Denmark/16/2001(H1N1)	NHT		NST	NHT	NIN	NNT	NSS	NGT		DGS				NTT	NWS
A/Denmark/17/2001(H1N1)	NHT		NST	NNT	NIN	NNT	NSS	NGT		NGS				NTT	NWS
A/Denmark/20/2001(H1N1)	NHT		NST	NNT	NIN	NNT	NSS	NGT		NGS				NTT	NWS
A/Denmark/3/2001(H1N1)	NHT		NST	NNT	NIN	NNT	NSS	NGT		NGS				NTT	NWS
A/Denmark/36/2001(H1N1)	NHT		NST	NHT	NIN	NNT	NSS	NGT		NGS				NTT	NWS
A/Denmark/40/2001(H1N1)	NHT		NST	NHT	NIN	NNT	NSS	NGT		NGS				NTT	NWS
A/Denmark/6/2001(H1N1)	NYT		NRT	NQT	NIN	NNT	NSS	NGT		NGS				NTT	NWS
A/Hanoi/1863/2001(H1N1)	NHT		NST	NHT	NIN	NNT	NSS	NGT		NGS				NTT	NWS
A/Hong Kong/747/2001(H1N1)	NHT		NST	NHT	NIN	NNT	NSS	NGT		NGS				NTT	NWS
A/Memphis/1/2001(H1N1)	NHT		NST	NHT	NIN	NNT	NSS	NGT		NGS				NTT	NWS
A/Memphis/6/2001(H1N1)	NHT		NST	NHT	NIN	NNT	NSS	NGT		NGS				NTT	NWS
A/Memphis/7/2001(H1N1)	NHT		NST	NHT	NIN	NNT	NSS	NGT		NGS				NTT	NWS
A/Memphis/8/2001(H1N1)	NHT		NST	NHT	NIN	NNT	NSS	NGT		NGS				NTT	NWS
A/Morocco/69/2001(H1N1)	NHT		NST	NHT	NIN	NNT	NSS	NGT		NGS				NTT	NWS
A/New York/205/2001(H1N1)	NHT		NST	NHT	NIN	NNT	NSS	NGT		NGS				NTT	NWS
A/New York/208/2001(H1N1)	NHT		NST	NHT	NIN	NNT	NSS	NGT		NGS				NTT	NWS
A/New York/212/2001(H1N1)	NHT		NST	NHT	NIN	NNT	NSS	NGT		NGS				NAT	NWS
A/New York/235/2001(H1N1)	NYT		NRT	NQT	NIN	NNT	NSS	NGT		NGS				NTT	NWS
A/New York/239/2001(H1N1)	NHT		NST	NHT	NIN	NNT	NSS	NGT		NGS				NTT	NWS
A/New York/241/2001(H1N1)	NHT		NST	NHT	NIN	NNT	NSS	NGT		NGS				NTT	NWS
A/New York/242/2001(H1N1)	NHT		NST	NHT	NIN	NNT	NSS	NGT		NGS				NTT	NWS
A/New York/246/2001(H1N1)	NHT		NST	NHT	NIN	NNT	NSS	NGT		NGS				NTT	NWS
A/New York/281/2001(H1N1)	NHT		NST	NHT	NIN	NNT	NSS	NGT		NGS				NTT	NWS
A/New York/302/2001(H1N1)	NHT		NST	NHT	NIN	NNT	NSS	NGT		NGS				NTT	NWS
A/New York/303/2001(H1N1)	NHT		NST	NHT	NIN	NNT	NSS	NGT		NGS				NTT	NWS
A/New York/306/2001(H1N1)	NHT		NST	NHT	NIN	NNT	NSS	NGT		NGS				NTT	NWS
A/New York/307/2001(H1N1)	NYT		NRT	NQT	NIN	NNT	NSS	NGT		NGS				NTT	NWS
A/New York/308/2001(H1N1)	NHT		NST	NHT	NIN	NNT	NSS	NGT		NGS				NTT	NWS
A/New York/309/2001(H1N1)	NHT		NST	NHT	NIN	NNT	NSS	NGT		NGS				NTT	NWS
A/New York/310/2001(H1N1)	NHT		NST	NHT	NIN	NNT	NSS	NGT		NGS				NTT	NWS
A/New York/312/2001(H1N1)	NHT		NST	NHT	NIN	NNT	NSS	NGT		NGS				NTT	NWS
A/New York/341/2001(H1N1)	NHT		NST	NHT	NIN	NNT	NSS	NGT		NGS				NTT	NWS
A/New York/342/2001(H1N1)	NHT		NST	NNT	NIN	NNT	NSS	NGT		NGS				NTT	NWS
A/New York/343/2001(H1N1)	NHT		NST	NHT	NIN	NNT	NSS	NGT		NGS				NTT	NWS
A/New York/344/2001(H1N1)	NHT		NST	NHT	NIN	NNT	NSS	NGT		NGS				NTT	NWS
A/New York/345/2001(H1N1)	NYT		NRT	NQT	NIN	NNT	NSS	NGT		NGS				NTT	NWS
A/New York/346/2001(H1N1)	NHT		NST	NHT	NIN	NNT	NSS	NGT		NGS				NTT	NWS
A/New York/441/2001(H1N1)	NHT		NST	NNT	NIN	NNT	NSS	NGT		NGS				NTT	NWS
A/New York/442/2001(H1N1)	NHT		NST	NHT	NIN	NNT	NSS	NGT		NGS				NTT	NWS
A/New York/443/2001(H1N1)	NHT		NST	NHT	NIN	NNT	NSS	NGT		NGS				NTT	NWS
A/New York/444/2001(H1N1)	NHT		NST	NHT	NIN	NNT	NSS	NGT		NGS				NTT	NWS
A/New York/445/2001(H1N1)	NHT		NST	NNT	NIN	NNT	NSS	NGT		NGS				NTT	NWS
A/New York/446/2001(H1N1)	NHT		NST	NHT	NIN	NNT	NSS	NGT		NGS				NTT	NWS
A/New York/447/2001(H1N1)	NHT		NST	NHT	NIN	NNT	NSS	NGT		NGS				NTT	NWS
A/Paris/1694/01(H1N1)	NHT		NST	NHT	NIN	NNT	NSS	NGT		NGS				NTT	NWS
A/South Canterbury/15/2001(H1N1)	NHT		NST	NHT	NIN	NNT	NSS	NGT		NGS				NTT	NWS
A/South Canterbury/159/2001(H1N1)	NHT		NST	NHT	NIN	NNT	NSS	NGT		NGS				NTT	NWS
A/Stockholm/8/2001(H1N1)	NHT		NST	NHT	NIN	NNT	NSS	NGT		NGS				NTT	NWS
A/Waikato/10/2001(H1N1)	NHT		NST	NHT	NIN	NNT	NSS	NGT		NGS				NTT	NWS
A/Waikato/16/2001(H1N1)	NHT		NST	NHT	NIN	NNT	NSS	NGT		NGS				NTT	NWS
A/Waikato/18/2001(H1N1)	NHT		NST	NHT	NIN	NNT	NSS	NGT		NGS				NTT	NWS
A/Waikato/20/2001(H1N1)	NHT		NST	NHT	NIN	NNT	NSS	NGT		NGS				NTT	NWS
A/Waikato/3/2001(H1N1)	NHT		NST	NHT	NIN	NNT	NSS	NGT		NGS				NTT	NWS
A/Waikato/4/2001(H1N1)	NHT		NST	NHT	NIN	NNT	NSS	NGT		NGS				NTT	NWS
A/Waikato/42/2001(H1N1)	NHT		NST	NHT	NIN	NNT	NSS	NGT		NGS				NTT	NWS
A/Waikato/51/2001(H1N1)	NHT		NST	NHT	NIN	NNT	NSS	NGT		NGS				NTT	NWS
A/Waikato/7/2001(H1N1)	NHT		NST	NHT	NIN	NNT	NSS	NGT		NGS				NTT	NWS
A/Waikato/80/2001(H1N1)	NHT		NST	NHT	NIN	NNT	NSS	NGT		NGS				NTT	NWS
A/Waikato/92/2001(H1N1)	NHT		NST	NHT	NIN	NNT	NSS	NGT		NGS				NTT	NWS
A/Wellington/1/2001(H1N1)	NHT		NST	NHT	NIN	NNT	NSS	NGT		NGS				NTT	NWS
A/Wellington/17/2001(H1N1)	NHT		NST	NHT	NIN	NNT	NSS	NGT		NGS				NTT	NWS
A/Wellington/28/2001(H1N1)	NHT		NST	NHT	NIN	NNT	NSS	NGT		NGS				NTT	NWS
A/Wellington/3/2001(H1N1)	NHT		NST	NHT	NIN	NNT	NSS	NGT		NGS				NTT	NWS
A/Wellington/32/2001(H1N1)	NHT		NNT	NHT	NIN	NNT	NSS	NGT		NGS				NTT	NWS
A/Wellington/9/2001(H1N1)	NHT		NST	NHT	NIN	NNT	NSS	NGT		NGS				NTT	NWS
A/West Coast/31/2001(H1N1)	NHT		NST	NHT	NIN	NNT	NSS	NGT		NGS				NTT	NWS
A/West Coast/33/2001(H1N1)	NHT		NST	NHT	NIN	NNT	NSS	NGT		NGS				NTT	NWS
A/Western Australia/18/2001(H1N1)	NHT		NST	NHT	NIN	NNT	NSS	NGT		NGS				NTT	NWS
A/Western Australia/19/2001(H1N1)	NHT		NST	NHT	NIN	NNT	NSS	NGT		NGS				NTT	NWS
A/Western Australia/20/2001(H1N1)	NHT		NST	NHT	NIN	NNT	NSS	NGT		NGS				NTT	NWS
A/Western Australia/21/2001(H1N1)	NHT		NST	NHT	NIN	NNT	NSS	NGT		NGS				NTT	NWS
A/Western Australia/22/2001(H1N1)	NHT		NST	NHT	NIN	NNT	NSS	NGT		NGS				NTT	NWS
(A/New York/494/2002(H1N1)	NHT		NST	NHT	NIN	NNT	NSS	NGT		NGS				NTT	DWS
(A/Seoul/11/2002(H1N1)	NHT		NST	NHT	NIN	NNT	NSS	NGT		NGS				NTT	NWS
A/Chonnam/07/2002(H1N1)	NHT		NST	NHT	NIN	NNT	NSS	NGT		NGS				NTT	NWS
A/Chonnam/18/2002(H1N1)	NHT		NST	NHT	NIN	NNT	NSS	NGT		NGS				NTT	NWS
A/Chonnam/19/2002(H1N1)	NHT		NST	NHT	NIN	NNT	NSS	NGT		NGS				NTT	NWS
A/Chonnam/51/2002(H1N1)	NHT		NST	NHT	NIN	NNT	NSS	NGT		NGS				NTT	NWS
A/Chungbuk/50/2002(H1N1)	NHT		NST	NHT	NIN	NNT	NSS	NGT		NGS				NTT	NWS
A/Finland/131/2002(H1N1)	NHT		NST	NHT	NIN	NNT	NSS	NGT		NGS				NTT	NWS
A/Gwangju/55/2002(H1N1)	NHT		NST	NHT	NIN	NNT	NSS	NGT		NGS				NTT	NWS
A/Gwangju/57/2002(H1N1)	NHT		NST	NHT	NIN	NNT	NSS	NGT		NGS				NAT	NWS
A/Gwangju/58/2002(H1N1)	NHT		NST	NHT	NIN	NNT	NSS	NGT		NGS				NAT	NWS
A/Gwangju/90/2002(H1N1)	NHT		NST	NHT	NIN	NNT	NSS	NGT		NGS				NTT	NWS
A/Hanoi/1873/2002(H1N1)	NHT		NST	NHT	NIN	NNT	NSS	NGT		NGS				NTT	NWS
A/Hanoi/191/2002(H1N1)	NHT		NST	NHT	NIN	NNT	NSS	NGT		NGS				NTT	NWS
A/Hanoi/1928/2002(H1N1)	NHT		NST	NHT	NIN	NNT	NSS	NGT		NGS				NTT	DWS
A/Hanoi/2006/2002(H1N1)	NHT		NST	NHT	NIN	NNT	NSS	NGT		NGS				NTT	NWS
A/Hong Kong/437/2002(H1N1)	NHT		NST	NHT	NIN	NNT	NSS	NGT		NGS				NTT	NWS
A/HongKong/CUHK-13003/2002(H1N1)	NHT		NST	NHT	NIN	NNT	NSS	NGT		NGS				NTT	NWS
A/Morioka/17/2002(H1N1)	NHT		NST	NHT	NIN	NNT	NSS	NGT		NGS				NTT	NWS
A/Morioka/27/2002(H1N1)	NHT		NST	NHT	NIN	NNT	NSS	NGT		NGS				NTT	NWS
A/New York/220/2002(H1N1)	NHT		NST	NHT	NIN	NNT	NSS	NGT		NGS				NTT	NWS
A/New York/291/2002(H1N1)	NHT		NST	NHT	NIN	NNT	NSS	NGT		NGS				NTT	NWS
A/Paris/0833/2002(H1N1)	NHT		NST	NHT	NIN	NNT	NSS	NGT		NGS				NTT	NWS
A/Paris/1399/2002(H1N1)	NHT		NST	NHT	NIN	NNT	NSS	NGT		NGS				NTT	NWS
A/Paris/2084/2002(H1N1)	NHT		NST	NHT	NIN	NNT	NSS	NGT		NGS				NTS	NWS
A/Pusan/22/2002(H1N1)	NHT		NST	NHT	NIN	NNT	NSS	NGT		NGS				NTT	NWS
A/Pusan/23/2002(H1N1)	NHT		NST	NHT	NIN	NNT	NSS	NGT		NGS				NTT	NWS
A/Pusan/24/2002(H1N1)	NHT		NST	NHT	NIN	NNT	NSS	NGT		NGS				NTT	NWS
A/Pusan/44/2002(H1N1)	NHT		NST	NHT	NIN	NNT	NSS	NGT		NGS				NTT	NWS
A/Pusan/45/2002(H1N1)	NHT		NST	NHT	NIN	NNT	NSS	NGT		NGS				NTT	NWS
A/Pusan/46/2002(H1N1)	NHT		NST	NHT	NIN	NNT	NSS	NGT		NGS				NTT	NWS
A/Pusan/47/2002(H1N1)	NHT		NST	NHT	NIN	NNT	NSS	NGT		NGS				NTT	NWS
A/Seoul/13/2002(H1N1)	NHT		NST	NHT	NIN	NNT	NSS	NGT		NGS				NTT	NWS
A/Seoul/15/2002(H1N1))	NHT		NST	NHT	NIN	NNT	NSS	NGT		NGS				NTT	NWS
A/Seoul/33/2002(H1N1)	NHT		NST	NHT	NIN	NNT	NSS	NGT		NGS				NTT	NWS
A/Taiwan/123/2002(H1N1)	NHT		NST	NHT	NIN	NNT	NSS	NGT		NGS				NTT	NWS
A/Taiwan/2984/2002(H1N1)	NHT		NST	NHT	NIN	NNT	NSS	NGT		NGS				NTT	NWS
A/Taiwan/30017/2002(H1N1)	NHT		NST	NHT	NIN	NNT	NSS	NGT		NGS				NTT	NWS
A/Taiwan/30020/2002(H1N1)	NHT		NST	NHT	NIN	NNT	NSS	NGT		NGS				NTT	NWS
A/Taiwan/52/2002(H1N1)	NHT		NNT	NHT	NIN	NNT	NSS	NGT		NGS				NTT	NWS
A/Taiwan/567/2002(H1N1)	NHT		NST	NHT	NIN	NNT	NSS	NGT		NGS				NTT	NWS
A/Hanoi/1004/2003(H1N1)	NHT		NST	NHT	NIN	NNT	NSS	NGT		NGS				NTT	NWS
A/Hanoi/719/2003(H1N1)	NHT		NST	NHT	NIN	NNT	NSS	NGT		NGS				NAT	NWS
A/Hanoi/777/2003(H1N1)	NHT		NST	NHT	NIN	NNT	NSS	NGT		NGS				NTT	NWS
A/Hanoi/784b/2003(H1N1)	NHT		NST	NHT	NIN	NNT	NSS	NGT		NGS				NTT	NWS
A/Hanoi/902b/2003(H1N1)	NHT		NST	NHT	NIN	NNT	NSS	NGT		NGS				NTT	NWS
A/Hanoi/959b/2003(H1N1)	NHT		NST	NHT	NIN	NNT	NSS	NGT		NGS				NTT	NWS
A/Memphis/5/2003(H1N1)	NHT		NST	NHT	NIN	NNT	NSS	NGT		NGS				NTT	NWS
A/Memphis/6/2003(H1N1)	NHT		NST	NHT	NIN	NNT	NSS	NGT		NGS				NTT	NWS
A/New York/221/2003(H1N1)	NHT		NST	NHT	NIN	NNT	NSS	NGT		NGS				NTT	NWS
A/New York/222/2003(H1N1)	NHT		NST	NHT	NIN	NNT	NSS	NGT		NGS				NTT	NWS
A/New York/223/2003(H1N1)	NHT		NST	NNT	NIN	NNT	NSS	NGT		NGS				NTT	NWS
A/New York/227/2003(H1N1)	NHT		NST	NHT	NIN	NNT	NSS	NGT		NGS				NTT	NWS
A/New York/228/2003(H1N1)	NHT		NST	NHT	NIN	NNT	NSS	NGT		NGS	NGT			NTT	NWS
A/New York/230/2003(H1N1)	NHT		NST	NHT	NIN	NNT	NSS	NGT		NGS				NTT	NWS
A/New York/292/2003(H1N1)	NHT		NST	NHT	NIN	NNT	NSS	NGT		NGS				NTT	NWS
A/New York/293/2003(H1N1)	NHT		NST	NHT	NIN	NNT	NSS	NGT		NGS				NTT	NWS
A/New York/348/2003(H1N1)	NHT		NST	NHT	NIN	NNT	NSS	NGT		NGS				NTT	NWS
A/New York/350/2003(H1N1)	NHT		NST	NHT	NIN	NNT	NSS	NGT		NGS				NTT	NWS
A/New York/399/2003(H1N1)	NHT		NST	NHT	NIN	NNT	NSS	NGT		NGS				NTT	NWS
A/New York/483/2003(H1N1)	NHT		NST	NHT	NIN	NNT	NSS	NGT		NGS				NTT	NWS
A/New York/484/2003(H1N1)	NHT		NST	NHT	NIN	NNT	NSS	NGT		NGS				NTT	NWS
A/New York/486/2003(H1N1)	NHT		NST	NHT	NIN	NNT	NSS	NGT		NGS				NTT	NWS
A/New York/488/2003(H1N1)	NHT		NST	NHT	NIN	NNT	NSS	NGT		NGS				NTT	NWS
A/New York/493/2003(H1N1)	NHT		NST	NHT	NIN	NNT	NSS	NGT		NGS				NTT	NWS
A/New York/496/2003(H1N1)	NHT		NST	NHT	NIN	NNT	NSS	NGT		NGS				NTT	NWS
A/New York/497/2003(H1N1)	NHT		NST	NHT	NIN	NNT	NSS	NGT		NGS				NTT	NWS
A/Canterbury/106/2004(H1N1)	NHT		NST	NHT	NIN	NNT	NSS	NGT		NGS				NTT	NWS
A/Denmark/130/2004(H1N1)	NHT		NST	NHT	NIN	NNT	NSS	NGT		NGS				NTT	NWS
A/Denmark/15/2004(H1N1)	NHT		NST	NHT	NIN	NNT	NSS	NGT		NGS				NTT	NWS
A/Denmark/16/2004(H1N1)	NHT		NST	NHT	NIN	NNT	NSS	NGT		NGS				NTT	NWS
A/Denmark/17/2004(H1N1)	NHT		NST	NHT	NIN	NNT	NSS	NGT		NGS				NTT	NWS
A/Florida/3e/2004(H1N1)	NHT		NST	NHT	NIN	NNT	NSS	NGT		NGS				NTT	NWS
A/Hong Kong/2637/2004(H1N1)	NHT		NST	NHT	NIN	NNT	NSS	NGT		NGS				NTT	NWS
A/New Caledonia/9/2004(H1N1)	NHT		NST	NHT	NIN	NNT	NSS	NGT		NGS				NTT	NWS
A/Paris/650/2004(H1N1)	NHT		NST	NHT	NIN	NNT	NSS	NGT		NGS				NTT	NWS
A/Singapore/14/2004(H1N1)	NHT		NST	NHT	NIN	NNT	NSS	NGT		NGS				NTT	NC-
A/Singapore/23/2004(H1N1)	NHT		NST	NHT	NIN	NNT	NSS	NGT		NGS				NTT	NWS	270NAS
A/Auckland/619/2005(H1N1)	NHT		NST	NHT	NIN	NNT	NSS	NGT		NGS				NTT	NWS
A/Azarbayejan-Sharghi/147/2005(H1N1)	NPT		NST	NHT	NIN	NNT	NSS	NGT		NGS				NTT	NWS
A/Berlin/18/2005(H1N1)	NHT		NST	NHT	NIN	NNT	NSS	NGT		NGS				NTT	NWS
A/Berlin/60/2005(H1N1)	NHT		NST	NHT	NIN	NNT	NSS	NGT		NGS				NTT	NWS
A/Bremen/4/2005(H1N1)	NHT		NST	NHT	NIN	NNT	NSS	NGT		NGS				NTT	NWS
A/Bremen/5/2005(H1N1)	NHT		NST	NHT	NIN	NNT	NSS	NGT		NGS				NTT	NWS
A/Denmark/11/2005(H1N1)	NHT		NST	NHT	NIN	NNT	NSS	NGT		NGS				NTT	NWS
A/Denmark/110/2005(H1N1)	NHT		NST	NHT	NIN	NNT	NSS	NGT		NGS				NTT	NWS
A/Denmark/116/2005(H1N1)	NHT		NST	NHT	NIN	NNT	NSS	NGT		NGS				NTT	NWS
A/Denmark/124/2005(H1N1)	NHT		NST	NHT	NIN	NNT	NSS	NGT		NGS				NTT	NWS
A/Denmark/135/2005(H1N1)	NHT		NST	NHT	NIN	NNT	NSS	NGT		NGS				NTT	NWS
A/Denmark/184/2005(H1N1)	NHT		NST	NHT	NIN	NNT	NSS	NGT		NGS				NTT	NWS
A/Denmark/22/2005(H1N1)	NHT		NST	NHT	NIN	NNT	NSS	NGT		NGS				NTT	NWS
A/Denmark/226/2005(H1N1)	NHT		NST	NHT	NIN	NNT	NSS	NGT		NGS				NTT	NWS
A/Denmark/3/2005(H1N1)	NHT		NST	NHT	NIN	NNT	NSS	NGT		NGS				NTT	NWS
A/Denmark/33/2005(H1N1)	NHT		NST	NHT	NIN	NNT	NSS	NGT		NGS				NTT	NWS
A/Denmark/54/2005(H1N1)	NHT		NST	NHT	NIN	NNT	NSS	NGT		NGS				NTT	NWS
A/Denmark/79/2005(H1N1)	NHT		NST	NHT	NIN	NNT	NSS	NGT		NGS				NTT	NWS
A/Hamburg/1/2005(H1N1)	NHT		NST	NHT	NIN	NNT	NSS	NGT		NGS				NTT	NWS
A/Hamedan/7/2005(H1N1)	NHT		NST	NHT	NIN	NNT	NSS	NGT		NGS				NTT	NWS
A/Hanoi/ISBM15/2005(H1N1)	NHT		NST	NHT	NIN	NNT	NSS	NGT		NGS				NTT	NWS
A/Hanoi/ISBM23/2005(H1N1)	NHT		NST	NHT	NIN	NNT	NSS	NGT		NGS				NTT	NWS
A/Hanoi/ISBM27/2005(H1N1)	NHT		NST	NHT	NIN	NNT	NSS	NGT		NGS				NTT	NWS
A/Hanoi/ISBM31/2005(H1N1)	NHT		NST	NHT	NIN	NNT	NSS	NGT		NGS				NTT	NWS
A/Hessen/4/2005(H1N1)	NHT		NST	NHT	NIN	NNT	NSS	NGT		NGS				NTT	NWS
A/Iowa/CEID23/2005(H1N1)	NHT		NNT	NRT	NIS	SNT	NSS	NGT		NGS				NTI	SWS
A/Kentucky/1/2005(H1N1)	NHT		NST	NHT	NIN	NNT	NSS	NGT		NGS				NTT	NWS
A/Morioka/1/2005(H1N1)	NHT		NST	NHT	NIN	NNT	NSS	NGT		NGS				NTT	NWS
A/Morioka/21/2005(H1N1)	NHT		NST	NHT	NIN	NNT	NSS	NGT		NGS				NTT	NWS
A/Morioka/3/2005(H1N1)	NNT		NST	NHT	NIN	NNT	NSS	NGT		NGS				NTT	NWS
A/Morioka/4/2005(H1N1)	NHT		NST	NHT	NIN	NNT	NSS	NGT		NGS				NTT	NWS
A/Morioka/5/2005(H1N1)	NHT		NST	NHT	NIN	NNT	NSS	NGT		NGS				NTT	NWS
A/Morioka/7/2005(H1N1)	NHT		NST	NHT	NIN	NNT	NSS	NGT		NGS				NTT	NWS
A/Myanmar/M002/2005(H1N1)	NHT		NST	NNT	NIN	NNT	NSS	NGT		NGS				NTT	NWS
A/Myanmar/M003/2005(H1N1)	NHT		NST	NHT	NIN	NNT	NSS	NGT		NGS				NTT	NWS
A/Myanmar/M004/2005(H1N1)	NHT		NST	NNT	NIN	NNT	NSS	NGT		NGS				NTT	NWS
A/Myanmar/M006/2005(H1N1)	NHT		NST	NHT	NIN	NNT	NSS	NGT		NGS				NTT	NWS
A/Myanmar/M007/2005(H1N1)	NHT		NST	NHT	NIN	NNT	NSS	NGT		NGS				NTT	NWS
A/Myanmar/M008/2005(H1N1)	NHT		NST	NNT	NIN	NNT	NSS	NGT		NGS				NTT	NWS
A/Myanmar/M010/2005(H1N1)	NHT		NST	NHT	NIN	NNT	NSS	NGT		NGS				NTT	NWS
A/Myanmar/M011/2005(H1N1)	NHT		NST	NHT	NIN	NNT	NSS	NGT		NGS				NTT	NWS
A/Myanmar/M012/2005(H1N1)	NHT		NST	NHT	NIN	NNT	NSS	NGT		NGS				NTT	NWS
A/Myanmar/M013/2005(H1N1))	NHT		NST	NHT	NIN	NNT	NSS	NGT		NGS				NTT	NWS
A/Myanmar/M014/2005(H1N1)	NHT		NST	NNT	NIN	NNT	NSS	NGT		NGS				NTT	NWS
A/Niedersachsen/191/2005(H1N1)	NHT		NST	NHT	NIN	NNT	NSS	NGT		NGS				NTT	NWS
A/Niedersachsen/192/2005(H1N1)	NHT		NST	NHT	NIN	NNT	NSS	NGT		NGS				NTT	NWS
A/Niedersachsen/202/2005(H1N1)	NHT		NST	NHT	NIN	NNT	NSS	NGT		NGS				NTT	NWS
A/Niedersachsen/217/2005(H1N1)	NHT		NST	NHT	NIN	NNT	NSS	NGT		NGS				NTT	NWS
A/Niedersachsen/218/2005(H1N1)	NHT		NST	NHT	NIN	NNT	NSS	NGT		NGS				NTT	NWS
A/Nordrhein-Westfalen/6/2005(H1N1)	NHT		NST	NHT	NIN	NNT	NSS	NGT		NGS				NTT	NWS
A/Otago/5/2005(H1N1)	NHT		NST	NHT	NIN	NNT	NSS	NGT		NGS				NTT	NWS
A/Rheinland-Pfalz/58/2005(H1N1)	NHT		NST	NHT	NIN	NNT	NSS	NGT		NGS				NTT	NWS
A/Sachsen/14/2005(H1N1)	NHT		NST	NNT	NIN	NNT	NSS	NGT		NGS				NTT	NWS
A/South Australia/51/2005(H1N1)	NHT		NST	NHT	NIN	NNT	NSS	NGT		NGS				NTT	NWS
A/South Australia/55/2005(H1N1)	NHT		NST	NHT	NIN	NNT	NSS	NGT		NGS				NTT	NWS
A/South Australia/56/2005(H1N1)	NHT		NST	NHT	NIN	NNT	NSS	NGT		NGS				NTT	NWS
A/South Australia/57/2005(H1N1)	NHT		NST	NHT	NIN	NNT	NSS	NGT		NGS				NTT	NWS
A/South Australia/58/2005(H1N1)	NHT		NST	NHT	NIN	NNT	NSS	NGT		NGS				NTT	NWS
A/Tabriz/7/2005(H1N1)	NHT		NST	NHT	NIN	NNT	NSS	NGT		NGS				NTT	NWS
A/Tehran/29/2005(H1N1)	NHT		NST	NHT	NIN	NNT	NSS	NGT		NGS				NTT	NWS
A/Thailand/271/2005(H1N1)	NKP	NQS	NNT	NQT	NIS	SNT	NSS	NGT		NGS			NFS	NTI	GWS
A/Thessaloniki/24/2005(H1N1)	NYT		NRT	NQT	NIN	NNT	NSS	NGT		NGS				NTT	NWS
A/Thueringen/40/2005(H1N1	NYT		NRT	NQT	NIN	NNT	NSS	NGT		NGS				NTT	NWS
A/Victoria/504e/2005(H1N1)	NHT		NST	NHT	NIN	NNT	NSS	NGT		NGS				NTT	-
A/Waikato/11/2005(H1N1)	NHT		NST	NHT	NIN	NNT	NSS	NGT		NGS				NTT	NWS
A/Waikato/13/2005(H1N1)	NHT		NST	NHT	NIN	NNT	NSS	NGT		NGS				NTT	NWS
A/Waikato/14/2005(H1N1)	NHT		NST	NHT	NIN	NNT	NSS	NGT		NGS				NTT	NWS
A/Waikato/17/2005(H1N1)	NHT		NST	NHT	NIN	NNT	NSS	NGT		NGS				NTT	NWS
A/Waikato/4/2005(H1N1)	NHT		NST	NHT	NIN	NNT	NSS	NGT		NGS				NTT	NWS
A/Wellington/10/2005(H1N1)	NHT		NST	NHT	NIN	NNT	NSS	NGT		NGS				NTT	NWS
A/Wellington/11/2005(H1N1)	NHT		NST	NHT	NIN	NNT	NSS	NGT		NGS				NTT	NWS
A/Wellington/12/2005(H1N1)	NHT		NST	NHT	NIN	NNT	NSS	NGT		NGS				NTT	NWS
A/Wellington/13/2005(H1N1)	NHT		NST	NHT	NIN	NNT	NSS	NGT		NGS				NTT	NWS
A/Wellington/14/2005(H1N1)	NHT		NST	NHT	NIN	NNT	NSS	NGT		NGS				NTT	NWS
A/Western Australia/77/2005(H1N1)	NHT		NST	NHT	NIN	NNT	NSS	NGT		NGS				NTT	NWS
A/Alabama/20/2006(H1N1)	NHT		NST	NHT	NIN	NNT	NSS	NGT		NGS				NTT	NWS
A/Azarbayejan_Sharghi/150/2006(H1N1)	NHT		NST	NHT	NIN	NNT	NSS	NGT		NGS				NTT	NWS
A/Azarbayejan_Sharghi/153/2006(H1N1)	NNT		NST	NHT	NIN	NNT	NSS	NGT		NGS				NTT	NWS
A/Azarbayejan_Sharghi/155/2006(H1N1)	NHT		NST	NHT	NIN	NNT	NSS	NGT		NGS				NTT	NWS
A/Azarbayejan-Sharghi/179/2006(H1N1)	NHT		NST	NHT	NIN	NNT	NSS	NGT		NGS				NTT	NWS
A/Azarbayejan-Sharghi/181/2006(H1N1)	NHT		NST	NHT	NIN	NNT	NSS	NGT		NGS				NTT	NWS
A/Baden-Wuerttemberg/3/2006(H1N1)	NHT		NST	NHT	NIN	NNT	NSS	NGT		NGS				NTT	NWS
A/Baden-Wuerttemberg/4/2006(H1N1)	NHT		NST	NHT	NIN	NNT	NSS	NGT		NGS				NTT	NWS
A/Baden-Wuerttemberg/5/2006(H1N1)	NHT		NST	NHT	NIN	NNT	NSS	NGT		NGS				NAT	NWS
A/Berlin/13/2006(H1N1)	NHT		NST	NHT	NIN	NNT	NSS	NGT		NGS				NTT	NWS
A/Berlin/6/2006(H1N1)	NHT		NST	NHT	NIN	NNT	NSS	NGT		NGS				NTT	NWS
A/Berlin/9/2006(H1N1)	NHT		NST	NHT	NIN	NNT	NSS	NGT		NGS				NTT	NWS
A/Brandenburg/1/2006(H1N1)	NHT		NST	NHT	NIN	NNT	NSS	NGT		NGS				NTT	NWS
A/Brisbane/297/2006(H1N1)	NHT		NST	NHT	NIN	NNT	NSS	NGT		NGS				NTT	NWS
A/Caen/1670/2006(H1N1)	NHT		NST	NHT	NIN	NNT	NSS	NGT		NGS				NTT	NWS
A/Caen/1951/2006(H1N1)	NHT		NST	NHT	NIN	NNT	NSS	NGT		NGS				NTT	NWS
A/California/09/2006(H1N1)	NHT		NST	NHT	NIN	NNT	NSS	NGT		NGS				NTT	NWS
A/California/10/2006(H1N1)	NNT		NST	NHT	NIN	NNT	NSS	NGT		NGS				NTT	NWS
A/Cambodia/Q024/2006(H1N1)	NHT		NST	NHT	NIN	NNT	NSS	NGT		NGS				NTT	NWS
A/Delaware/4/2006(H1N1)	NHT		NST	NHT	NIN	NNT	NSS	NGT		NGS				NTT	NWS
A/Denmark/47/2006(H1N1)	NHT		NST	NHT	NIN	NNT	NSS	NGT		NGS				NTT	NWS
A/Denmark/48/2006(H1N1)	NHT		NST	NHT	NIN	NNT	NSS	NGT		NGS				NTT	NWS
A/Denmark/49/2006(H1N1)	NHT		NST	NHT	NIN	NNT	NSS	NGT		NGS				NTT	NWS
A/Denmark/50/2006(H1N1)	NHT		NST	NHT	NIN	NNT	NSS	NGT		NGS				NTX	NWS
A/England/493/2006(H1N1)	NHT		NST	NHT	NIN	NNT	NSS	NGT		NGS				NTT	NWS
A/England/494/2006(H1N1)	NHT		NST	NHT	NIN	NNT	NSS	NGT		NGS				NTT	NWS
A/England/514/2006(H1N1)	NHT		NST	NHT	NIN	NNT	NSS	NGT		NGS				NAT	NWS
A/England/593/2006(H1N1)	NHT		NST	NHT	NIN	NNT	NSS	NGT		NGS				NTT	NWS
A/England/594/2006(H1N1)	NHT		NST	NHT	NIN	NNT	NSS	NGT		NGS				NTT	NWS
A/Florida/3/2006(H1N1)	NHT		NST	NHT	NIN	NNN	NSS	NGT		NGS				NTT	NWS
A/Fukushima/141/2006(H1N1)	NHT		NST	NHT	NIN	NNT	NSS	NGT		NGS				NTT	NWS
A/Georgia/08/2006(H1N1)	NHT		NST	NHT	NIN	NNT	NSS	NGT		NGS				NTT	NWS
A/Georgia/17/2006(H1N1)	NHT		NST	NHT	NIN	NNT	NSS	NGT		NGS				NTT	NWS
A/Georgia/20/2006(H1N1)	NHT		NST	NHT	NIN	NNT	NSS	NGT		NGS				NTT	NWS
A/Georgia/20/2006(H1N1)	NHT		NST	NHT	NIN	NNT	NSS	NGT		NGS				NTT	NWS
A/Georgia/20/2006(H1N1)	NHT		NST	NHT	NIN	NNT	NSS	NGT		NGS				NTT	NWS
A/Georgia/21/2006(H1N1)	NHT		NST	NHT	NIN	NNT	NSS	NGT		NGS				NTT	NWS
A/Georgia/26/2006(H1N1)	NHT		NST	NHT	NIN	NNT	NSS	NGT		NGS				NTT	NWS
A/Gholestan/215/2006(H1N1)	NHT		NST	NHT	NIN	NNT	NSS	NGT		NGS				NTT	NWS
A/Guangzhou/1561/2006(H1N1)	NHT		NST	NHT	NIN	NNT	NSS	NGT		NGS				NTT	NWS
A/Guangzhou/1684/2006(H1N1)	NHT		NST	NHT	NIN	NNT	NSS	NGT		NGS				NTT	NWS
A/Guangzhou/483/2006(H1N1)	NHT		NST	NHT	NIN	NNT	NSP	NGT		NGS				NTT	NWS
A/Guangzhou/506/2006(H1N1)	NHT		NST	NHT	NIN	NNT	NSS	NGT		NGS				NTT	NWS	398NWS
A/Guangzhou/555/2006(H1N1)	NHT		NST	NHT	NIN	NNT	NSS	NGT		NGS				NTT	NWS
A/Guangzhou/657/2006(H1N1)	NHT		NST	NHT	NIN	NNT	TSS	NGT		NGS				NTT	NWS
A/Guangzhou/665/2006(H1N1)	NHT		NST	NHT	NIN	NNT	NSS	NGT		NGS				NTT	NWS
A/Hanoi/BM344/2006(H1N1)	NHT		NST	NHT	NIN	NNT	NSS	NGT		NGS				NTT	NWS
A/Hanoi/BM356/2006(H1N1)	NHT		NST	NHT	NIN	NNT	NSS	NGT		NGS				NTT	NWS
A/Hanoi/Q137/2006(H1N1)	NHT		NST	NHT	NIN	NNT	NSS	NGT		NGS				NTT	NWS
A/Hanoi/Q177/2006(H1N1)	NHT		NST	NHT	NIN	NNT	NSS	NGT		NGS				NTT	NWS
A/Hanoi/TX09/2006(H1N1)	NHT		NST	NHT	NIN	NNT	NSS	NGT		NGS				NTT	NWS
A/Hong Kong/2652/2006(H1N1)	NHT		NST	NHT	NIN	NNT	NSS	NGT		NGS				NTT	NWS
A/Illinois/01/2006(H1N1)	NHT		NST	NHT	NIN	NNT	NSS	NGT		NGS				NAT	NWS
A/Illinois/02/2006(H1N1)	NHT		NST	NHT	NIN	NNT	NSS	NGT		NGS				NAT	NWS
A/Indiana/6/2006(H1N1)	NHT		NST	NHT	NIN	NNT	NSS	NGT		NGS				NTT	NWS
A/Kentucky/UR06-0007/2006(H1N1)	NHT		NST	NHT	NIN	NNT	NSS	NGT		NGS				NTT	NWS
A/Kentucky/UR06-0010/2006(H1N1)	NHT		NST	NHT	NIN	NNT	NSS	NGT		NGS				NTT	NWS
A/Khorasan/166/2006(H1N1)	NHT		NST	NHT	NIN	NNT	NSS	NGT		NGS				NTT	NWS
A/Khorasan/280/2006(H1N1)	NHT		NST	NHT	NIN	NNT	NSS	NGT		NGS				NTT	NWS
A/Khozestan/380/2006(H1N1)	NHT		NST	NHT	NIN	NNT	NSS	NGT		NGS				NTT	NWS
A/Khozestan/459/2006(H1N1)	NHT		NST	NHT	NIN	NNT	NSS	NGT		NGS				NTT	NWS
A/Maryland/6/2006(H1N1)	NHT		NST	NHT	NIN	NNT	NSS	NGT		NGS				NTT	NWS
A/Maryland/6/2006(H1N1)	NHT		NST	NHT	NIN	NNT	NSS	NGT		NGS				NTT	NWS
A/Maryland/7/2006(H1N1)	NHT		NST	NHT	NIN	NNT	NSS	NGT		NGS				NTT	NWS
A/Massachusetts/07/2006(H1N1)	NHT		NST	NHT	NIN	NNT	NSS	NGT		NGS				NTT	NWS
A/Massachusetts/08/2006(H1N1)	NHT		NST	NHT	NIN	NNT	NSS	NGT		NGS				NTT	NWS
A/Massachusetts/6/2006(H1N1)	NHT		NST	NHT	NIN	NNT	NSS	NGT		NGS				NTT	NWS
A/Memphis/13/2006(H1N1)	NHT		NST	NHT	NIN	NNT	NSS	NGT		NGS				NTT	NWS
A/Michigan/UR06-0015/2006(H1N1)	NHT		NST	NHT	NIN	NNT	NSS	NGT		NGS				NTT	NWS
A/Mississippi/UR06-0014/2006(H1N1)	NHT		NST	NHT	NIN	NNT	NSS	NGT		NGS				NTT	NWS
A/Missouri/11/2006(H1N1)	NHT		NST	NHT	NIN	NNT	NSS	NGT		NGS				NTT	NWS
A/Missouri/12/2006(H1N1)	NHT		NST	NHT	NIN	NNT	NSS	NGT		NGS				NTT	NWS
A/Missouri/13/2006(H1N1)	NHT		NST	NHT	NIN	NNT	NSS	NGT		NGS				NTT	NWS
A/New Jersey/04/2006(H1N1)	NHT		NST	NHT	NIN	NNT	NSS	NGT		NGS				NTT	NWS
A/New Mexico/02/2006(H1N1)	NHT		NST	NHT	NIN	NNT	NSS	NGT		NGS				NTT	NWS
A/New York/8/2006(H1N1)	NHT		NST	NHT	NIN	NNT	NSS	NGT		NGS				NTT	NWS
A/Niedersachsen/4/2006(H1N1)	NHT		NST	NHT	NIN	NNT	NSS	NGT		NGS				NTT	DWS
A/Niedersachsen/5/2006(H1N1))	NHT		NST	NHT	NIN	NNT	NSS	NGT		NGS				NTT	DWS
A/North Carolina/UR06-0011/2006(H1N1)	NHT		NST	NHT	NIN	NNT	NSS	NGT		NGS				NTT	NWS
A/Ohio/04/2006(H1N1)	NHT		NST	NNT	NIN	NNT	NSS	NGT		NGS				NTT	NWS
A/Ohio/05/2006(H1N1)	NHT		NST	NHT	NIN	NNT	NSS	NGT		NGS				NTT	NWS
A/Oklahoma/3/2006(H1N1)	NHT		NST	NHT	NIN	NNT	NSS	NGT		NGS				NTT	NWS
A/Paris/2149/2006(H1N1)	NHT		NST	NHT	NIN	NNT	NSS	NGT		NGS				NTT	NWS
A/Paris/2207/2006(H1N1)	NHT		NST	NHT	NIN	NNT	NSS	NGT		NGS				NTT	NWS
A/Rheinland-Pfalz/1/2006(H1N1)	NHT		NST	NHT	NIN	NNT	NSS	NGT		NGS				NTT	NWS
A/Solomon Islands/3/2006(H1N1)	NHT		NST	NHT	NIN	NNT	NSS	NGT		NGS				NTT	NWS
A/South Carolina/2/2006(H1N1)	NHT		NST	NHT	NIN	NNT	NSS	NGT		NGS				NTT	NWS
A/St. Petersburg/8/2006(H1N1)	NHT		NST	NHT	NIN	NNT	NSS	NGT		NGS				NTT	NWS
A/Tehran/171/2006(H1N1)	NHT		NST	NHT	NIN	NNT	NSS	NGT		NGS				NTT	NWS
A/Tehran/371/2006(H1N1)	NHT		NST	NHT	NIN	NNT	NSS	NGT		NGS				NTT	NWS
A/Texas/UR06-0012/2006(H1N1)	NHT		NST	NHT	NIN	NNT	NSS	NGT		NGS				NTT	NWS
A/Thailand/328/2006(H1N1)	NHT		NST	NHT	NIN	NNT	NSS	NGT		NGS				NTT	NWS
A/Thailand/331/2006(H1N1)	NHT		NST	NHT	NIN	NNT	NSS	NGT		DGS				NTT	NWS
A/Thailand/332/2006(H1N1)	NHT		NST	NHT	NIN	NNT	NSS	NGT		NGS				NTT	NWS
A/Thailand/334/2006(H1N1)	NHT		NST	NHT	NIN	NNT	NSS	NGT		NGS				NTT	NWS
A/Thailand/336/2006(H1N1)	NHT		NST	NHT	NIN	NNT	NSS	NGT		NGS				NAT	NWS
A/Thailand/337/2006(H1N1)	NHT		NST	NHT	NIN	NNT	NSS	NGT		NGS				NTT	NWS
A/Thailand/344/2006(H1N1)	NHT		NST	NHT	NIN	NNT	NSS	NGT		NGS				NTT	NWS
A/Thailand/348/2006(H1N1)	NHT		NST	NNT	NIN	NNT	NSS	NGT		NGS				NTT	NWS
A/Thailand/364/2006(H1N1)	NHT		NST	NHT	NIN	NNT	NSS	NGT		NGS				NTT	NWS
A/Thailand/385/2006(H1N1)	NHT		NST	NHT	NIN	NNT	NSS	NGT		NGS				NTT	NWS
A/Thailand/386/2006(H1N1)	NHT		NST	NHT	NIN	NNT	NSS	NGT		NGS				NTT	NWS
A/Thailand/387/2006(H1N1)	NHT		NST	NHT	NIN	NNT	NSS	NGT		NGS				NTT	NWS
A/Thailand/388/2006(H1N1)	NHT		NST	NHT	NIN	NNT	NSS	NGT		NGS				NTT	NWS
A/Thailand/390/2006(H1N1))	NHT		NST	NNT	NIN	NNT	NSS	NGT		NGS				NTT	NWS
A/Thailand/391/2006(H1N1)	NHT		NST	NHT	NIN	NNT	NSS	NGT		NGS				NTT	NWS
A/Thailand/392/2006(H1N1)	NHT		NST	NHT	NIN	NNT	NSS	NGT		NGS				NTT	NWS
A/Thailand/393/2006(H1N1)	NHT		NST	NHT	NIN	NNT	NSS	NGT		NGS				NTT	NWS
A/Thailand/395/2006(H1N1)	NHT		NST	NHT	NIN	NNT	NSS	NGT		NGS				NTT	NWS
A/Thailand/396/2006(H1N1)	NHT		NST	NHT	NIN	NNT	NSS	NGT		NGS				NTT	NWS
A/Thailand/397/2006(H1N1)	NHT		NST	NHT	NIN	NNT	NSS	NRT		NGS				NTT	NWS
A/Thailand/398/2006(H1N1)	NHT		NST	NHT	NIN	NNT	NSS	NGT		NGS				NAT	NWS
A/Thailand/399/2006(H1N1)	NHT		NST	NHT	NIN	NNT	NLS	NGT		NGS				NTT	NWS
A/Thailand/400/2006(H1N1)	NHT		NST	NHT	NIN	NNT	NSS	NGT		NGS				NTT	NWS
A/Thailand/401/2006(H1N1)	NHT		NST	NHT	NIN	NNT	NSS	NGT		NGS				NTT	NWS
A/Thailand/402/2006(H1N1)	NHT		NST	NHT	NIN	NNT	NSS	NGT		NGS				NTT	NWS
A/Thailand/403/2006(H1N1)	NHT		NST	NHT	NIN	NNT	NSS	NGT		NGS				NTT	NWS
A/Thailand/404/2006(H1N1)	NHT		NST	NHT	NIN	NNT	NSS	NGT		NGS				NTT	NWS
A/Thailand/423/2006(H1N1)	NHT		NST	NNT	NIN	NNT	NSS	NGT		NGS				NTT	NWS
A/Thailand/424/2006(H1N1)	NHT		NST	NHT	NIN	NNT	NSS	NGT		NGS				NTT	NWS
A/Thailand/425/2006(H1N1)	NHT		NST	NHT	NIN	NNT	NSS	NGT		NGS				NTT	NWS
A/Thailand/708/2006(H1N1)	NHT		NST	NTT	NIN	NNT	NSS	NGT		NGS				NTT	NWS
A/Thailand/72/2006(H1N1)	NHT		NST	NHT	NIN	NNT	NSS	NGT		NGS				NAT	NWS
A/Thailand/76/2006(H1N1)	NHT		NST	NHT	NIN	NNT	NSS	NGT		NGS				NTT	NWS
A/Thailand/CU32/2006(H1N1)	NHT		NST	NHT	NIN	NNT	NSS	NGT		NGS				NTT	NWS
A/Thailand/CU41/2006(H1N1)	NHT		NST	NHT	NIN	NNT	NSS	NGT		NGS				NTT	NWS
A/Thailand/CU44/2006(H1N1)	NHT		NST	NHT	NIN	NNT	NSS	NGT		NGS				NTT	NWS
A/Thailand/CU51/2006(H1N1)	NHT		NST	NHT	NIN	NNT	NSS	NGT		NGS				NTT	NWS
A/Thailand/CU53/2006(H1N1)	NHT		NST	NHT	NIN	NNT	NSS	NGT		NGS				NTT	NWS
A/Thailand/CU57/2006(H1N1)	NHT		NST	NHT	NIN	NNT	NSS	NGT		NGS				NTT	NWS
A/Thailand/CU67/2006(H1N1)	NHT		NST	NHT	NIN	NNT	NSS	NGT		NGS				NTT	NWS
A/Thailand/CU68/2006(H1N1)	NHT		NNT	NHT	NIN	NNT	NSS	NGT		NGS				NTT	NWS
A/Thailand/CU75/2006(H1N1)	NHT		NNT	NHT	NIN	NNT	NSS	NGT		NGS				NTT	NWS
A/Thailand/CU88/2006(H1N1)	NHT		NST	NHT	NIN	NNT	NSS	NGT		NGS				NAT	NWS
A/Washington/07/2006(H1N1)	NHT		NST	NHT	NIN	NNT	NSS	NGT		NGS				NTT	NWS
A/Washington/08/2006(H1N1)	NHT		NST	NHT	NIN	NNT	NSS	NGT		NGS				NTT	NWS
A/Washington/2328/2006(H1N1)	NHT		NST	NHT	NIN	NNT	NSS	NGT		NGS				NTT	NWS
A/Washington/5846/2006(H1N1)	NHT		NST	NHT	NIN	NNT	NSS	NGT		NGS				NAT	NWS
A/Wisconsin/19/2006(H1N1)	NHT		NST	NHT	NIN	NNT	NSS	NGT		NGS				NTT	NWS
A/Wisconsin/47/2006(H1N1)	NHT		NST	NHT	NIN	NNT	NSS	NGT		NGS				NTT	NWS
A/Wisconsin/48/2006(H1N1)	NHT		NST	NHT	NIN	NNT	NSS	NGT		NGS				NTT	NWS
A/Wisconsin/49/2006(H1N1)	NHT		NST	NHT	NIN	NNT	NSS	NGT		NGS				NTT	NWS
A/Wisconsin/51/2006(H1N1)	NHT		NST	NHT	NIN	NNT	NSS	NGT		NGS				NTT	NWS
A/Wisconsin/52/2006(H1N1)	NHT		NST	NHT	NIN	NNT	NSS	NGT		NGS				NTT	NWS
A/Wisconsin/53/2006(H1N1)	NHT		NST	NHT	NIN	NNT	NSS	NGT		NGS				NTT	NWS
A/Wisconsin/54/2006(H1N1)	NHT		NST	NHT	NIN	NNT	NSS	NGT		NGS				NTT	NWS
A/Yazd/144/2006(H1N1)	NHT		NST	NHT	NIN	NNT	NSS	NGT		NGS				NTT	NWS
A/Zhejiang/Xiaocheng/1345/2006(H1N1)	NHT		NST	NHT	NIN	NNT	NSS	NGT		NGS				NTT	NWS
A/Alabama/UR06-0455/2007(H1N1)	NHT		NST	NHT	NIN	NNT	NSS	NGT		NGS				NTT	NWS
A/Alabama/UR06-0536/2007(H1N1)	NHT		NST	NNT	NIN	NNT	NSS	NGT		NGS				NTT	NWS
A/Alaska/01/2007(H1N1)	NYT		NST	NQT	NIN	NNT	NLS	NGT		NGS				NTT	NWS
A/Arkansas/01/2007(H1N1)	NHT		NST	NHT	NIN	NNT	NSS	NGT		NGS				NTT	NWS
A/Arkansas/01/2007(H1N1)	NHT		NST	NHT	NIN	NNT	NSS	NGT		NGS				NTT	NWS
A/Busan/03/2007(H1N1)	NHT		NST	NHT	NIN	NNT	NSS	NGT		NGS				NTT	NWS
A/Busan/08/2007(H1N1)	NHT		NST	NHT	NIN	NNT	NSS	NGT		NGS				NTT	NWS
A/California/02/2007(H1N1)	NHT		NST	NHT	NIN	NNT	NSS	NGT		NGS				NTT	NWS
A/California/03/2007(H1N1)	NHT		NST	NHT	NIN	NNT	NSS	NGT		NGS				NTT	NWS
A/California/04/2007(H1N1)	NHT		NST	NHT	NIN	NNT	NSS	NGT		NGS				NTT	NWS
A/California/05/2007(H1N1)	NHT		NST	NHT	NIN	NNT	NSS	NGT		NGS				NTT	NWS
A/California/UR06-0125/2007(H1N1)	NHT		NST	NHT	NIN	NNT	NSS	NGT		NGS				NTT	NWS
A/California/UR06-0232/2007(H1N1)	NHT		NST	NHT	NIN	NNT	NSS	NGT		NGS				NTT	NWS
A/California/UR06-0302/2007(H1N1)	NHT		NST	NHT	NIN	NNT	NSS	NGT		NGS				NTT	NWS
A/California/UR06-0321/2007(H1N1)	NHT		NST	NHT	NIN	NNT	NSS	NGT		NGS				NTT	NWS
A/California/UR06-0374/2007(H1N1)	NHT		NST	NHT	NIN	NNT	NSS	NGT		NGS				NAT	NWS
A/California/UR06-0375/2007(H1N1)	NHT		NST	NHT	NIN	NNT	NSS	NGT		NGS				NTT	NWS
A/California/UR06-0393/2007(H1N1)	NHT		NST	NHT	NIN	NNT	NSS	NGT		NGS				NTT	NWS
A/California/UR06-0435/2007(H1N1)	NHT		NST	NHT	NIN	NNT	NSS	NGT		NGS				NTT	NWS
A/California/UR06-0439/2007(H1N1)	NHT		NST	NHT	NIN	NNT	NSS	NGT		NGS				NTT	NWS
A/California/UR06-0440/2007(H1N1)	NHT		NST	NHT	NIN	NNT	NSS	NGT		NGS				NTT	NWS
A/California/UR06-0442/2007(H1N1)	NHT		NST	NHT	NIN	NNT	NSS	NGT		NGS				NTT	NWS
A/California/UR06-0462/2007(H1N1)	NHT		NNT	NNT	NIN	NNT	NSS	NGT		NGS				NTT	NWS
A/California/UR06-0479/2007(H1N1)	NHT		NST	NNT	NIN	NNT	NSS	NGT		NGS				NTT	DWS
A/California/UR06-0552/2007(H1N1)	NHT		NST	NHT	NIN	NNT	NSS	NGT		NGS				NTT	NWS
A/California/UR06-0564/2007(H1N1)	NHT		NST	NHT	NIN	NNT	NSS	NGT		NGS				NTT	NWS
A/California/UR06-0585/2007(H1N1)	NHT		NST	NHT	NIN	NNT	NSS	NGT		NGS				NAT	NWS
A/Cambodia/21/2007(H1N1)	NHT		NST	NHT	NIN	NNT	NSS	NGT		NGS				NTT	NWS
A/Colorado/UR06-0053/2007(H1N1)	NHT		NST	NHT	NIN	NNT	NSS	NGT		NGS				NTT	NWS
A/Colorado/UR06-0110/2007(H1N1)	NHT		NST	NHT	NIN	NNT	NSS	NGT		NGS				NTT	NWS
A/Colorado/UR06-0111/2007(H1N1)	NHT		NST	NHT	NIN	NNT	NSS	NGT		NGS				NTT	NWS
A/Colorado/UR06-0207/2007(H1N1)	NHT		NST	NHT	NIN	NNT	NSS	NGT		NGS				NTT	NWS
A/Colorado/UR06-0255/2007(H1N1)	NHT		NST	NHT	NIN	NNT	NSS	NGT		NGS				NTT	NWS
A/Colorado/UR06-0287/2007(H1N1)	NHT		NST	NHT	NIN	NNT	NSS	NGT		NGS				NTT	NWS
A/Colorado/UR06-0336/2007(H1N1)	NHT		NST	NHT	NIN	NNT	NSS	NGT		NGS				NTT	NWS
A/Colorado/UR06-0496/2007(H1N1)	NHT		NST	NHT	NIN	NNT	NSS	NGT		NGS				NTT	NWS
A/Colorado/UR06-0498/2007(H1N1)	NHT		NST	NHT	NIN	NNT	NSS	NGT		NGS				NTT	NWS	40 NGS
A/Colorado/UR06-0499/2007(H1N1)	NHT		NST	NHT	NIN	NNT	NSS	NGT		NGS				NTT	NWS
A/Florida/UR06-0049/2007(H1N1)	NHT		NST	NHT	NIN	NNT	NSS	NGT		NGS				NTT	NWS
A/Florida/UR06-0208/2007(H1N1)	NHT		NST	NHT	NIN	NNT	NSS	NGT		NGS				NTT	NWS
A/Florida/UR06-0209/2007(H1N1)	NHT		NST	NHT	NIN	NNT	NSS	NGT		NGS				NTT	NWS
A/Florida/UR06-0265/2007(H1N1)	NHT		NST	NHT	NIN	NNT	NSS	NGT		NGS				NTT	NWS
A/Florida/UR06-0280/2007(H1N1)	NHT		NST	NHT	NIN	NNT	NSS	NGT		NGS				NTT	NWS
A/Florida/UR06-0354/2007(H1N1)	NHT		NST	NHT	NIN	NNT	NSS	NGT		NGS				NTT	NWS
A/Florida/UR06-0355/2007(H1N1)	NHT		NST	NHT	NIN	NNT	NSS	NGT		NGS				NTT	NWS
A/Florida/UR06-0383/2007(H1N1)	NHT		NST	NHT	NIN	NNT	NSS	NGT		NGS				NTT	NWS
A/Florida/UR06-0412/2007(H1N1)	NHT		NST	NHT	NIN	NNT	NSS	NGT		NGS				NTT	NWS
A/Florida/UR06-0447/2007(H1N1)	NHT		NST	NNT	NIN	NNT	NSS	NGT		NGS				NTT	NWS
A/Florida/UR06-0501/2007(H1N1)	NHT		NST	NHT	NIN	NNT	NSS	NGT		NGS				NTT	NWS
A/Florida/UR06-0577/2007(H1N1)	NHT		NST	NNT	NIN	NNT	NSS	NGT		NGS				NTT	NWS
A/Florida/UR06-0578/2007(H1N1)	NHT		NST	NHT	NIN	NNT	NSS	NGT		NGS				NTT	NWS
A/Gansu/Chenguan/1129/2007(H1N1)	NHT		NST	NNT	NIN	NNT	NSS	NGT		NGS				NTT	NWS
A/Georgia/131/2007(H1N1)	NHT		NST	NHT	NIN	NNT	NSS	NGT		NGS				NTT	NWS
A/Hawaii/15/2007(H1N1)	NHT		NST	NHT	NIN	NNT	NSS	NGT		NGS				NTT	NWS
A/Hawaii/16/2007(H1N1)	NHT		NST	NHT	NIN	NNT	NSS	NGT		NGS				NTT	NWS
A/Hawaii/17/2007(H1N1)	NHT		NST	NHT	NIN	NNT	NSS	NGT		NGS				NTT	NWS
A/Hawaii/19/2007(H1N1)	NHT		NST	NHT	NIN	NNT	NSS	NGT		NGS				NTT	NWS
A/Hawaii/19/2007(H1N1)	NHT		NST	NHT	NIN	NNT	NSS	NGT		NGS				NTT	NWS
A/Hawaii/38/2007(H1N1)	NHT		NST	NHT	NIN	NNT	NSS	NGT		NGS				NTT	NWS
A/Hawaii/38/2007(H1N1)	NHT		NST	NHT	NIN	NNT	NSS	NGT		NGS				NTT	NWS
A/Hawaii/42/2007(H1N1)	NHT		NNT	NHT	NIN	NNT	NSS	NGT		NGS				NTT	NWS
A/Hawaii/43/2007(H1N1)	NNT		NST	NHT	NIN	NNT	NSS	NGT		NGS				NTT	NWS
A/Hawaii/44/2007(H1N1)	NHT		NST	NHT	NIN	NNT	NSS	NGT		NGS				NTT	NWS
A/Hawaii/45/2007(H1N1)	NHT		NST	NHT	NIN	NNT	NSS	NGT		NGS				NAT	NWS
A/Hawaii/46/2007(H1N1)	NHT		NST	NHT	NIN	NNT	NSS	NGT		NGS				NTT	NWS
A/Idaho/06/2007(H1N1)	NHT		NST	NHT	NIN	NNT	NSS	NGT		NGS				NTT	NWS
A/Illinois/UR006-018/2007(H1N1)	NHT		NST	NHT	NIN	NNT	NSS	NGT		NGS				NTT	NWS
A/Illinois/UR06-0019/2007(H1N1)	NHT		NST	NHT	NIN	NNT	NSS	NGT		NGS				NTT	NWS
A/Illinois/UR06-0032/2007(H1N1)	NHT		NST	NHT	NIN	NNT	NSS	NGT		NGS				NTT	NWS
A/Illinois/UR06-0074/2007(H1N1)	NHT		NST	NHT	NIN	NNT	NSS	NGT		NGS				NTT	NWS
A/Illinois/UR06-0088/2007(H1N1)	NHT		NST	NHT	NIN	NNT	NSS	NGT		NGS				NTT	NWS
A/Illinois/UR06-0093/2007(H1N1)	NHT		NST	NHT	NIN	NNT	NSS	NGT		NGS				NTT	NWS
A/Illinois/UR06-0094/2007(H1N1)	NHT		NST	NNT	NIN	NNT	NSS	NGT		NGS				NTT	NWS
A/Illinois/UR06-0095/2007(H1N1)	NHT		NST	NHT	NIN	NNT	NSS	NGT		NGS				NTT	NWS
A/Illinois/UR06-0096/2007(H1N1)	NHT		NST	NNT	NIN	NNT	NSS	NGT		NGS				NTT	NWS
A/Illinois/UR06-0098/2007(H1N1)	NHT		NST	NHT	NIN	NNT	NSS	NGT		NGS				NTT	NWS
A/Illinois/UR06-0115/2007(H1N1)	NHT		NST	NHT	NIN	NNT	NSS	NGT		NGS				NTT	NWS
A/Illinois/UR06-0116/2007(H1N1)	NHT		NST	NHT	NIN	NNT	NSS	NGT		NGS				NTT	NWS
A/Illinois/UR06-0131/2007(H1N1)	NHT		NST	NHT	NIN	NNT	NSS	NGT		NGS				NTT	NWS
A/Illinois/UR06-0136/2007(H1N1)	NHT		NST	NHT	NIN	NNT	NSS	NGT		NGS				NTT	NWS
A/Illinois/UR06-0137/2007(H1N1)	NHT		NST	NHT	NIN	NNT	NSS	NGT		NGS				NTT	NWS
A/Illinois/UR06-0146/2007(H1N1)	NHT		NST	NHT	NIN	NNT	NSS	NGT		NGS				NTT	NWS
A/Illinois/UR06-0215/2007(H1N1)	NHT		NST	NNT	NIN	NNT	NSS	NGT		NGS				NTT	NWS
A/Illinois/UR06-0223/2007(H1N1)	NHT		NST	NHT	NIN	NNT	NSS	NGT		NGS				NTT	NWS
A/Illinois/UR06-0224/2007(H1N1)	NHT		NST	NHT	NIN	NNT	NSS	NGT		NGS				NTT	NWS
A/Illinois/UR06-0227/2007(H1N1)	NHT		NST	NHT	NIN	NNT	NSS	NGT		NGS				NTT	NWS
A/Illinois/UR06-0248/2007(H1N1)	NHT		NST	NHT	NIN	NNT	NSS	NGT		NGS				NTT	NWS
A/Illinois/UR06-0249/2007(H1N1)	NHT		NST	NHT	NIN	NNT	NSS	NGT		NGS				NTT	NWS
A/Illinois/UR06-0333/2007(H1N1)	NYT		NRT	NQT	NIN	NNT	NSS	NGT		NGS				NTT	NWS
A/Illinois/UR06-0376/2007(H1N1)	NHT		NST	NHT	NIN	NNT	NSS	NGT		NGS				NTT	NWS
A/Illinois/UR06-0377/2007(H1N1)	NHT		NST	NHT	NIN	NNT	NSS	NGT		NGS				NTT	NWS
A/Illinois/UR06-0415/2007(H1N1)	NHT		NST	NHT	NIN	NNT	NSS	NGT		NGS				NTT	NWS
A/Illinois/UR06-0456/2007(H1N1)	NHT		NST	NHT	NIN	NNT	NSS	NGT		NGS				NTT	NWS
A/Illinois/UR06-0475/2007(H1N1)	NHT		NST	NHT	NIN	NNT	NSS	NGT		NGS				NTT	NWS
A/Illinois/UR06-0491/2007(H1N1)	NHT		NST	NHT	NIN	NNT	NSS	NGT		NGS				NTT	NWS
A/Kansas/UR06-0068/2007(H1N1)	NHT		NST	NHT	NIN	NNT	NSS	NGT		NGS				NTT	NWS
A/Kansas/UR06-0084/2007(H1N1)	NHT		NST	NHT	NIN	NNT	NSS	NGT		NGS				NTT	NWS
A/Kansas/UR06-0085/2007(H1N1)	NHT		NST	NHT	NIN	NNT	NSS	NGT		NGS				NTT	NWS
A/Kansas/UR06-0102/2007(H1N1)	NHT		NST	NHT	NIN	NNT	NSS	NGT		NGS				NTT	NWS
A/Kansas/UR06-0103/2007(H1N1)	NHT		NST	NHT	NIN	NNT	NSS	NGT		NGS				NTT	NWS
A/Kansas/UR06-0104/2007(H1N1)	NHT		NST	NHT	NIN	NNT	NSS	NGT		NGS				NTT	NWS
A/Kansas/UR06-0140/2007(H1N1)	NHT		NST	NHT	NIN	NNT	NSS	NGT		NGS				NTT	NWS
A/Kansas/UR06-0143/2007(H1N1)	NHT		NST	NHT	NIN	NNT	NSS	NGT		NGS				NTT	NWS
A/Kansas/UR06-0191/2007(H1N1)	NHT		NST	NHT	NIN	NNT	NSS	NGT		NGS				NTT	NWS
A/Kansas/UR06-0192/2007(H1N1)	NHT		NST	NHT	NIN	NNT	NSS	NGT		NGS				NTT	NWS
A/Kansas/UR06-0283/2007(H1N1)	NHT		NST	NHT	NIN	NNT	NSS	NGT		NGS				NTT	NWS
A/Kansas/UR06-0284/2007(H1N1)	NHT		NST	NHT	NIN	NNT	NSS	NGT		NGS				NTT	NWS
A/Kansas/UR06-0299/2007(H1N1)	NHT		NST	NHT	NIN	NNT	NSS	NGT		NGS				NTT	NWS
A/Kentucky/UR06-0027/2007(H1N1)	NHT		NST	NHT	NIN	NNT	NSS	NGT		NGS				NTT	NWS
A/Kentucky/UR06-0028/2007(H1N1)	NHT		NST	NHT	NIN	NNT	NSS	NGT		NGS				NTT	NWS	307 NQS
A/Kentucky/UR06-0029/2007(H1N1)	NHT		NST	NHT	NIN	NNT	NSS	NGT		NGS				NTT	NWS
A/Kentucky/UR06-0033/2007(H1N1)	NHT		NST	NHT	NIN	NNT	NSS	NGT		NGS				NTT	NWS
A/Kentucky/UR06-0034/2007(H1N1)	NHT		NST	NHT	NIN	NNT	NSS	NGT		NGS				NTT	NWS
A/Kentucky/UR06-0042/2007(H1N1)	NHT		NST	NHT	NIN	NNT	NSS	NGT		NGS				NTT	NWS
A/Kentucky/UR06-0043/2007(H1N1)	NHT		NST	NHT	NIN	NNT	NSS	NGT		NGS				NTT	NWS
A/Kentucky/UR06-0046/2007(H1N1)	NHT		NST	NHT	NIN	NNT	NSS	NGT		NGS				NTT	NWS
A/Kentucky/UR06-0057/2007(H1N1)	NHT		NST	NHT	NIN	NNT	NSS	NGT		NGS				NTT	NWS
A/Kentucky/UR06-0058/2007(H1N1)	NHT		NST	NHT	NIN	NNT	NSS	NGT		NGS				NTT	NWS
A/Kentucky/UR06-0059/2007(H1N1)	NHT		NST	NHT	NIN	NNT	NSS	NGT		NGS				NTT	NWS
A/Kentucky/UR06-0061/2007(H1N1)	NHT		NST	NHT	NIN	NNT	NSS	NGT		NGS				NTT	NWS
A/Kentucky/UR06-0062/2007(H1N1)	NHT		NST	NHT	NIN	NNT	NSS	NGT		NGS				NTT	N-
A/Kentucky/UR06-0069/2007(H1N1)	NHT		NST	NHT	NIN	NNT	NSS	NGT		NGS				NTT	NWS
A/Kentucky/UR06-0070/2007(H1N1)	NST		NST	NHT	NIN	NNT	NSS	NGT		NGS				NTT	NWS
A/Kentucky/UR06-0071/2007(H1N1)	NHT		NST	NHT	NIN	NNT	NSS	NGT		NGS				NTT	NWS
A/Kentucky/UR06-0072/2007(H1N1)	NHT		NST	NHT	NIN	NNT	NSS	NGT		NGS				NTT	NWS
A/Kentucky/UR06-0081/2007(H1N1)	NHT		NST	NHT	NIN	NNT	NSS	NGT		NGS				NTT	NWS
A/Kentucky/UR06-0082/2007(H1N1)	NHT		NST	NHT	NIN	NNT	NSS	NGT		NGS				NTT	NWS
A/Kentucky/UR06-0097/2007(H1N1)	NHT		NST	NHT	NIN	NNT	NSS	NGT		NGS				NTT	NWS
A/Kentucky/UR06-0123/2007(H1N1)	NHT		NST	NHT	NIN	NNT	NSS	NGT		NGS				NTT	NWS
A/Kentucky/UR06-0127/2007(H1N1)	NHT		NST	NHT	NIN	NNT	NSS	NGT		NGS				NTT	NWS
A/Kentucky/UR06-0128/2007(H1N1)	NHT		NST	NHT	NIN	NNT	NSS	NGT		NGS				NTT	NWS
A/Kentucky/UR06-0129/2007(H1N1)	NHT		NST	NHT	NIN	NNT	NSS	NGT		NGS				NTT	NWS
A/Kentucky/UR06-0154/2007(H1N1)	NHT		NST	NHT	NIN	NNT	NSS	NGT		NGS				NTT	NWS
A/Kentucky/UR06-0161/2007(H1N1)	NHT		NST	NHT	NIN	NNT	NSS	NGT		NGS				NTT	NWS
A/Kentucky/UR06-0162/2007(H1N1)	NHT		NST	NHT	NIN	NNT	NSS	NGT		NGS				NTT	NWS
A/Kentucky/UR06-0181/2007(H1N1)	NHT		NST	NHT	NIN	NNT	NSS	NGT		NGS				NTT	NWS
A/Kentucky/UR06-0182/2007(H1N1)	NHT		NST	NHT	NIN	NNT	NSS	NGT		NGS				NTT	NWS
A/Kentucky/UR06-0183/2007(H1N1)	NHT		NST	NHT	NIN	NNT	NSS	NGT		NGS				NTT	NWS
A/Kentucky/UR06-0184/2007(H1N1)	NHT		NST	NHT	NIN	NNT	NSS	NGT		NGS				NTT	NWS
A/Kentucky/UR06-0187/2007(H1N1)	NHT		NST	NHT	NIN	NNT	NSS	NGT		NGS				NTT	NWS
A/Kentucky/UR06-0188/2007(H1N1)	NHT		NST	NHT	NIN	NNT	NSS	NGT		NGS				NTT	NWS
A/Kentucky/UR06-0220/2007(H1N1)	NHT		NST	NHT	NIN	NNT	NSS	NGT		NGS				NTT	NWS
A/Kentucky/UR06-0240/2007(H1N1)	NHT		NST	NHT	NIN	NNT	NSS	NGT		NGS				NAT	NWS
A/Kentucky/UR06-0257/2007(H1N1)	NHT		NST	NHT	NIN	NNT	NSS	NGT		NGS				NTT	NWS
A/Kentucky/UR06-0258/2007(H1N1)	NHT		NST	NHT	NIN	NNT	NSS	NGT		NGS				NTT	NWS
A/Kentucky/UR06-0259/2007(H1N1)	NHT		NST	NHT	NIN	NNT	NSS	NGT		NGS				NTT	NWS
A/Kentucky/UR06-0327/2007(H1N1)	NHT		NST	NHT	NIN	NNT	NSS	NGT		NGS				NTT	NWS
A/Kentucky/UR06-0328/2007(H1N1)	NHT		NST	NHT	NIN	NNT	NSS	NGT		NGS				NTT	NWS
A/Kentucky/UR06-0339/2007(H1N1)	NHT		NST	NHT	NIN	NNT	NSS	NGT		NGS				NTT	NWS
A/Kentucky/UR06-0363/2007(H1N1)	NHT		NST	NHT	NIN	NNT	NSS	NGT		NGS				NTT	NWS
A/Kentucky/UR06-0369/2007(H1N1)	NHT		NST	NHT	NIN	NNT	NSS	NGT		NGS				NTT	NWS
A/Kentucky/UR06-0371/2007(H1N1)	NHT		NST	NHT	NIN	NNT	NSS	NGT		NGS				NTT	NWS
A/Kentucky/UR06-0372/2007(H1N1)	NHT		NST	NHT	NIN	NNT	NSS	NGT		NGS				NTT	NWS
A/Kentucky/UR06-0391/2007(H1N1)	NHT		NST	NHT	NIN	NNT	NSS	NGT		NGS				NTT	NWS
A/Kentucky/UR06-0401/2007(H1N1)	NHT		NST	NNT	NIN	NNT	NSS	NGT		NGS				NTT	NWS
A/Kentucky/UR06-0424/2007(H1N1)	NHT		NST	NHT	NIN	NNT	NSS	NGT		NGS				NTT	NWS
A/Kentucky/UR06-0425/2007(H1N1)	NHT		NST	NHT	NIN	NNT	NSS	NGT		NGS				NTT	NWS
A/Kentucky/UR06-0449/2007(H1N1)	NHT		NST	NHT	NIN	NNT	NSS	NGT		NGS				NTT	NWS
A/Kentucky/UR06-0476/2007(H1N1)	NHT		NST	NHT	NIN	NNT	NSS	NGT		NGS				NTT	NWS
A/Kentucky/UR06-0538/2007(H1N1)	NHT		NST	NHT	NIN	NNT	NSS	NGT		NGS				NAT	NWS
A/Kentucky/UR06-0539/2007(H1N1)	NHT		NST	NHT	NIN	NNT	NSS	NGT		NGS				NTT	NWS
A/Kentucky/UR06-0553/2007(H1N1)	NHT		NST	NHT	NIN	NNT	NSS	NGT		NGS				NTT	NWS
A/Kyoto/07K001/2007(H1N1)	NHT		NST	NHT	NIN	NNT	NSS	NGT		NGS				NTT	NWS
A/Massachusetts/01/2007(H1N1)	NHT		NST	NHT	NIN	NNT	NSS	NGT		NGS				NTT	NWS
A/Massachusetts/02/2007(H1N1)	NHT		NST	NHT	NIN	NNT	NSS	NGT		NGS				NTT	NWS
A/Massachusetts/05/2007(H1N1)	NHT		NST	NHT	NIN	NNT	NSS	NGT		NGS				NTT	NWS
A/Memphis/01/2007(H1N1)	NHT		NST	NHT	NIN	NNT	NSS	NGT		NGS				NTT	NWS
A/Minnesota/23/2007(H1N1)	NHT		NST	NHT	NIN	NNT	NSS	NGT		NGS				NTT	NWS
A/Minnesota/25/2007(H1N1)	NHT		NST	NHT	NIN	NNT	NSS	NGT		NGS				NTT	NWS
A/Mississippi/UR06-0047/2007(H1N1)	NHT		NST	NHT	NIN	NNT	NSS	NGT		NGS				NTT	NWS
A/Mississippi/UR06-0048/2007(H1N1)	NHT		NST	NHT	NIN	NNT	NSS	NGT		NGS				NAT	NWS
A/Mississippi/UR06-0086/2007(H1N1)	NHT		NST	NHT	NIN	NNT	NSS	NGT		NGS				NTT	NWS
A/Mississippi/UR06-0130/2007(H1N1)	NHT		NST	NHT	NIN	NNT	NSS	NGT		NGS				NTT	NWS
A/Mississippi/UR06-0142/2007(H1N1)	NHT		NST	NHT	NIN	NNT	NSS	NGT		NGS				NTT	NWS
A/Mississippi/UR06-0145/2007(H1N1)	NHT		NST	NHT	NIN	NNT	NSS	NGT		NGS				NTT	NWS
A/Mississippi/UR06-0242/2007(H1N1)	NHT		NST	NHT	NIN	NNT	NSS	NGT		NGS				NTT	NWS
A/Mississippi/UR06-0537/2007(H1N1)	NHT		NST	NHT	NIN	NNT	NSS	NGT		NGS				NTT	NWS
A/Mississippi/UR06-0595/2007(H1N1)	NHT		NST	NHT	NIN	NNT	NSS	NGT		NGS				NTT	NWS
A/Nagasaki/07N001/2007(H1N1)	NHT		NST	NHT	NIN	NNT	NSS	NGT		NGS				NTT	NWS
A/Nebraska/02/2007(H1N1)	NHT		NST	NHT	NIN	NNT	NSS	NGT		NGS				NTT	NWS	270 NAS
A/New Jersey/09/2007(H1N1)	NHT		NST	NHT	NIN	NNT	NSS	NGT		NGS				NTT	NWS
A/New Jersey/11/2007(H1N1)	NHT		NST	NHT	NIN	NNT	NSS	NGT		NGS				NTT	NWS
A/New Mexico/05/2007(H1N1)	NHT		NST	NHT	NIN	NNT	NSS	NGT		NGS				NTT	NWS
A/New York/08/2007(H1N1)	NHT		NST	NHT	NIN	NNT	NSS	NGT		NGS				NTT	NWS
A/New York/UR06-0056/2007(H1N1)	NHT		NST	NHT	NIN	NNT	NSS	NGT		NGS				NTT	NWS
A/New York/UR06-0134/2007(H1N1)	NHT		NST	NHT	NIN	NNT	NSS	NGT		NGS				NTT	NWS
A/New York/UR06-0199/2007(H1N1)	NHT		NST	NHT	NIN	NNT	NSS	NGT		NGS				NTT	NWS
A/New York/UR06-0253/2007(H1N1)	NHT		NST	NHT	NIN	NNT	NSS	NGT		NGS	NGT			NTT	NWS
A/New York/UR06-0326/2007(H1N1)	NHT		NST	NHT	NIN	NNT	NSS	NGT		NGS				NTT	-
A/New York/UR06-0386/2007(H1N1)	NHT		NST	NHT	NIN	NNT	NSS	NGT		NGS	NGT			NAT	NWS
A/North Carolina/UR06-0099/2007(H1N1)	NHT		NST	NHT	NIN	NNT	NSS	NGT		NGS				NAT	NWS
A/North Carolina/UR06-0364/2007(H1N1)	NHT		NST	NHT	NIN	NNT	NSS	NGT		NGS				NTT	NWS
A/North Carolina/UR06-0365/2007(H1N1)	NHT		NST	NHT	NIN	NNT	NSS	NGT		NGS				NTT	NWS
A/North Dakota/01/2007(H1N1)	NHT		NST	NHT	NIN	NNT	NSS	NGT		NGS				NTT	NWS
A/Ohio/UR06-0091/2007(H1N1)	NHT		NST	NHT	NIN	NNT	NSS	NGT		NGS				NTT	NWS
A/Ohio/UR06-0100/2007(H1N1)	NHT		NST	NHT	NIN	NNT	NSS	NGT		NGS				NTT	NWS
A/Ohio/UR06-0112/2007(H1N1)	NHT		NST	NHT	NIN	NNT	NSS	NGT		NGS				NTT	NWS
A/Ohio/UR06-0121/2007(H1N1)	NHT		NST	NHT	NIN	NNT	NSS	NGT		NGS				NTT	NWS
A/Ohio/UR06-0122/2007(H1N1)	NHT		NST	NHT	NIN	NNT	NSS	NGT		NGS				NTT	NWS
A/Ohio/UR06-0166/2007(H1N1)	NHT		NST	NHT	NIN	NNT	NSS	NGT		NGS				NTT	NWS
A/Ohio/UR06-0177/2007(H1N1)	NHT		NST	NNT	NIN	NNT	NSS	NGT		NGS				NTT	NWS
A/Ohio/UR06-0178/2007(H1N1)	NHT		NST	NHT	NIN	NNT	NSS	NGT		NGS				NTT	NWS
A/Ohio/UR06-0233/2007(H1N1)	NHT		NST	NHT	NIN	NNT	NSS	NGT		NGS				NTT	NWS
A/Ohio/UR06-0296/2007(H1N1)	NHT		NST	NHT	NIN	NNT	NSS	NGT		NGS				NTT	NWS
A/Ohio/UR06-0325/2007(H1N1)	NHT		NST	NHT	NIN	NNT	NSS	NGT		NGS				NTT	NWS
A/Ohio/UR06-0341/2007(H1N1)	NHT		NST	NHT	NIN	NNT	NSS	NGT		NGS				NTT	NWS
A/Ohio/UR06-0353/2007(H1N1)	NHT		NST	NHT	NIN	NNT	NSS	NGT		NGS				NTT	NWS
A/Ohio/UR06-0394/2007(H1N1)	NHT		NST	NHT	NIN	NNT	NSS	NGT		NGS				NTT	NWS
A/Ohio/UR06-0411/2007(H1N1)	NHT		NST	NNT	NIN	NNT	NSS	NGT		NGS				NTT	NWS
A/Ohio/UR06-0429/2007(H1N1)	NHT		NST	NHT	NIN	NNT	NSS	NGT		NGS				NTT	NWS
A/Ohio/UR06-0443/2007(H1N1)	NHT		NST	NHT	NIN	NNT	NSS	NGT		NGS				NTT	NWS
A/Ohio/UR06-0465/2007(H1N1)	NHT		NST	NHT	NIN	NNT	NSS	NGT		NGS				NTT	NWS
A/Ohio/UR06-0493/2007(H1N1)	NHT		NST	NHT	NIN	NNT	NSS	NGT		NGS				NTT	NWS
A/Ohio/UR06-0518/2007(H1N1)	NHT		NST	NHT	NIN	NNT	NSS	NGT		NGS				NTT	NWS
A/Ohio/UR06-0521/2007(H1N1)	NHT		NST	NHT	NIN	NNT	NSS	NGT		NGS				NTT	NWS
A/Ohio/UR06-0522/2007(H1N1)	NHT		NST	NNT	NIN	NNT	NSS	NGT		NGS				NTT	NWS
A/Ohio/UR06-0591/2007(H1N1)	NNT		NST	NHT	NIN	NNT	NSS	NGT		NGS				NTT	NWS
A/Oklahoma/UR06-0063/2007(H1N1)	NHT		NST	NNT	NIN	NNT	NSS	NGT		NGS				NTT	N-
A/Oklahoma/UR06-0241/2007(H1N1)	NHT		NST	NHT	NIN	NNT	NSS	NGT		NGS				NTT	NWS
A/Oklahoma/UR06-0519/2007(H1N1)	NHT		NST	NHT	NIN	NNT	NSS	NGT		NGS				NTT	NWS
A/Oregon/06/2007(H1N1)	NHT		NST	NHT	NIN	NNT	NSS	NGT		NGS				NTT	NWS
A/Oregon/07/2007(H1N1)	NHT		NST	NHT	NIN	NNT	NSS	NGT		NGS				NTT	NWS
A/Oregon/UR06-0179/2007(H1N1)	NHT		NNT	NHT	NIN	NNT	NSS	NGT		NGS				NTT	NWS
A/Oregon/UR06-0185/2007(H1N1)	NHT		NST	NHT	NIN	NNT	NSS	NGT		NGS				NTT	NWS
A/Oregon/UR06-0186/2007(H1N1)	NHT		NST	NHT	NIN	NNT	NSS	NGT		NGS				NAT	NWS
A/Oregon/UR06-0219/2007(H1N1)	NHT		NST	NHT	NIN	NNT	NSS	NGT		NGS				NTT	NWS
A/Oregon/UR06-0230/2007(H1N1)	NHT		NST	NHT	NIN	NNT	NSS	NGT		NGS				NTT	NWS
A/Oregon/UR06-0231/2007(H1N1)	NHT		NST	NHT	NIN	NNT	NSS	NGT		NGS				NTT	NWS
A/Oregon/UR06-0291/2007(H1N1)	NHT		NST	NNT	NIN	NNT	NSS	NGT		NGS				NTT	NWS
A/Oregon/UR06-0609/2007(H1N1)	NHT		NST	NHT	NIN	NNT	NSS	NGT		NGS				NTT	NWS
A/Orkhon/1901/2007(H1N1)	NHT		NST	NHT	NIN	NNT	NSS	NGT		NGS				NTT	N-S
A/Paris/6/2007(H1N1)	NYT		NST	NQT	NIN	NNT	NSS	NGT		NGS				NTT	NWS
A/Paris/692/2007(H1N1)	NHT		NST	NHT	NIN	NNT	NSS	NGT		NGS				NTT	NWS
A/Sainshand/1142/2007(H1N1)	NHT		NST	NHT	NIN	NNT	NSS	NGT		NGS				NTT	NWS
A/South Dakota/03/2007(H1N1)	NHT		NST	NHT	NIN	NNT	NSS	NGT		NGS				NTT	NWS
A/South Dakota/04/2007(H1N1)	NHT		NST	NHT	NIN	NNT	NSS	NGT		NGS				NTT	NWS
A/St. Petersburg/10/2007(H1N1)	NHT		NST	NHT	NIN	NNT	NSP	NGT		NGS				NTT	NWS
A/Tehran/670/2007(H1N1)	NHT		NST	NHT	NIN	NNT	NSS	NGT		NGS				NTT	NWS	35 NHS
A/Tennessee/01/2007(H1N1)	NHT		NST	NHT	NIN	NNT	NSS	NGT		NGS				NTT	NWS
A/Tennessee/04/2007(H1N1)	NHT		NST	NHT	NIN	NNT	NSS	NGT		NGS				NTT	NWS
A/Tennessee/UR06-0073/2007(H1N1)	NHT		NST	NHT	NIN	NNT	NSS	NGT		NGS				NTT	NWS
A/Tennessee/UR06-0076/2007(H1N1)	NHT		NST	NHT	NIN	NNT	NSS	NGT		NGS				NTT	NWS
A/Tennessee/UR06-0078/2007(H1N1)	NHT		NST	NHT	NIN	NNT	NSS	NGT		NGS				NTT	NWS
A/Tennessee/UR06-0080/2007(H1N1)	NHT		NST	NHT	NIN	NNT	NSS	NGT		NGS				NTT	NWS
A/Tennessee/UR06-0087/2007(H1N1)	NHT		NST	NHT	NIN	NNT	NSS	NGT		NGS				NTT	NWS
A/Tennessee/UR06-0106/2007(H1N1)	NHT		NST	NHT	NIN	NNT	NSS	NGT		NGS				NTT	NWS
A/Tennessee/UR06-0113/2007(H1N1)	NHT		NST	NHT	NIN	NNT	NSS	NGT		NGS				NTT	NWS
A/Tennessee/UR06-0119/2007(H1N1)	NHT		NST	NHT	NIN	NNT	NSS	NGT		NGS				NTT	NWS
A/Tennessee/UR06-0120/2007(H1N1)	NHT		NST	NNT	NIN	NNT	NSS	NGT		NGS				NTT	NWS
A/Tennessee/UR06-0124/2007(H1N1)	NHT		NST	NHT	NIN	NNT	NSS	NGT		NGS				NTT	NWS
A/Tennessee/UR06-0151/2007(H1N1)	NHT		NST	NHT	NIN	NNT	NSS	NGT		NGS				NTT	NWS
A/Tennessee/UR06-0152/2007(H1N1)	NHT		NST	NHT	NIN	NNT	NSS	NGT		NGS				NTT	NWS
A/Tennessee/UR06-0234/2007(H1N1)	NHT		NST	NHT	NIN	NNT	NSS	NGT		NGS				NTT	NWS
A/Tennessee/UR06-0236/2007(H1N1)	NHT		NST	NHT	NIN	NNT	NSS	NGT		NGS				NTT	NWS
A/Tennessee/UR06-0238/2007(H1N1)	NHT		NST	NHT	NIN	NNT	NSS	NGT		NGS				NTT	NWS
A/Tennessee/UR06-0239/2007(H1N1)	NHT		NST	NHT	NIN	NNT	NSS	NGT		NGS				NTT	NWS
A/Tennessee/UR06-0262/2007(H1N1)	NHT		NST	NHT	NIN	NNT	NSS	NGT		NGS				NTT	NWS
A/Tennessee/UR06-0277/2007(H1N1)	NHT		NST	NHT	NIN	NNT	NSS	NGT		NGS				NTT	NWS
A/Tennessee/UR06-0294/2007(H1N1)	NHT		NST	NHT	NIN	NNT	NSS	NGT		NGS				NTT	NWS
A/Tennessee/UR06-0312/2007(H1N1)	NHT		NST	NHT	NIN	NNT	NSS	NGT		NGS				NTT	NWS
A/Tennessee/UR06-0379/2007(H1N1)	NHT		NST	NHT	NIN	NNT	NSS	NGT		NGS				NTT	NWS
A/Tennessee/UR06-0388/2007(H1N1)	NHT		NST	NNT	NIN	NNT	NSS	NGT		NGS				NTT	NWS
A/Tennessee/UR06-0414/2007(H1N1)	NHT		NST	NHT	NIN	NNT	NSS	NGT		NGS				NTT	NWS
A/Tennessee/UR06-0459/2007(H1N1)	NHT		NST	NHT	NIN	NNT	NSS	NGT		NGS				NTT	NWS
A/Tennessee/UR06-0473/2007(H1N1)	NHT		NST	NHT	NIN	NNT	NSS	NGT		NGS				NTT	NWS
A/Tennessee/UR06-0508/2007(H1N1)	NHT		NST	NHT	NIN	NNT	NSS	NGT		NGS				NTT	NWS
A/Tennessee/UR06-0509/2007(H1N1)	NHT		NST	NHT	NIN	NNT	NSS	NGT		NGS				NTT	NWS
A/Tennessee/UR06-0523/2007(H1N1)	NHT		NST	NHT	NIN	NNT	NSS	NGT		NGS				NTT	NWS
A/Texas/31/2007(H1N1)	NHT		NST	NHT	NIN	NNT	NSS	NGT		NGS				NTT	NWS
A/Texas/UR06-0025/2007(H1N1)	NHT		NST	NHT	NIN	NNT	NSS	NGT		NGS				NTT	NWS
A/Texas/UR06-0026/2007(H1N1)	NHT		NST	NHT	NIN	NNT	NSS	NGT		NGS				NTT	NWS
A/Texas/UR06-0038/2007(H1N1)	NHT		NST	NHT	NIN	NNT	NSS	NGT		NGS				NTT	NWS
A/Texas/UR06-0039/2007(H1N1)	NHT		NST	NHT	NIN	NNT	NSS	NGT		NGS				NTT	NWS
A/Texas/UR06-0133/2007(H1N1)	NHT		NST	NHT	NIN	NNT	NSS	NGT		NGS				NTT	NWS
A/Texas/UR06-0156/2007(H1N1)	NHT		NST	NHT	NIN	NNT	NSS	NGT		NGS				NTT	NWS
A/Texas/UR06-0157/2007(H1N1)	NHT		NST	NHT	NIN	NNT	NSS	NGT		NGS				NTT	NWS
A/Texas/UR06-0174/2007(H1N1)	NHT		NST	NHT	NIN	NNT	NSS	NGT		NGS				NTT	NWS
A/Texas/UR06-0175/2007(H1N1)	NHT		NST	NHT	NIN	NNT	NSS	NGT		NGS				NTT	NWS
A/Texas/UR06-0176/2007(H1N1)	NHT		NST	NHT	NIN	NNT	NSS	NGT		NGS				NTT	NWS
A/Texas/UR06-0193/2007(H1N1)	NHT		NST	NHT	NIN	NNT	NSS	NGT		NGS				NAT	NWS
A/Texas/UR06-0195/2007(H1N1)	NHT		NST	NHT	NIN	NNT	NSS	NGT		NGS				NTT	NWS
A/Texas/UR06-0196/2007(H1N1)	NHT		NST	NHT	NIN	NNT	NSS	NGT		NGS				NTT	NWS
A/Texas/UR06-0203/2007(H1N1)	NHT		NST	NHT	NIN	NNT	NSS	NGT		NGS				NTT	NWS
A/Texas/UR06-0204/2007(H1N1)	NHT		NST	NHT	NIN	NNT	NSS	NGT		NGS				NTT	NWS
A/Texas/UR06-0216/2007(H1N1)	NHT		NST	NNT	NIN	NNT	NSS	NGT		NGS				NTT	NWS
A/Texas/UR06-0250/2007(H1N1)	NHT		NST	NHT	NIN	NNT	NSS	NGT		NGS				NTT	NWS
A/Texas/UR06-0270/2007(H1N1)	NHT		NST	NHT	NIN	NNT	NSS	NGT		NGS				NTT	NWS
A/Texas/UR06-0271/2007(H1N1)	NHT		NST	NHT	NIN	NNT	NSS	NGT		NGS				NTT	NWS
A/Texas/UR06-0303/2007(H1N1)	NHT		NST	NHT	NIN	NNT	NSS	NGT		NGS				NTT	NWS
A/Texas/UR06-0305/2007(H1N1)	NHT		NST	NHT	NIN	NNT	NSS	NGT		NGS				NTT	NWS
A/Texas/UR06-0306/2007(H1N1)	NHT		NST	NHT	NIN	NNT	NSS	NGT		NGS				NTT	NWS
A/Texas/UR06-0308/2007(H1N1)	NHT		NST	NHT	NIN	NNT	NSS	NGT		NGS				NTT	NWS
A/Texas/UR06-0309/2007(H1N1)	NHT		NST	NHT	NIN	NNT	NSS	NGT		NGS				NTT	NWS
A/Texas/UR06-0323/2007(H1N1)	NHT		NST	NHT	NIN	NNT	TSS	NGT		NGS				NTT	NWS
A/Texas/UR06-0342/2007(H1N1)	NHT		NST	NNT	NIN	NNT	NSS	NGT		NGS				NTT	NWS
A/Texas/UR06-0357/2007(H1N1)	NHT		NST	NNT	NIN	NNT	NSS	NGT		NGS				NTT	NWS
A/Texas/UR06-0359/2007(H1N1)	NHT		NST	NHT	NIN	NNT	NSS	NGT		NGS				NTT	NWS
A/Texas/UR06-0380/2007(H1N1)	NHT		NST	NHT	NIN	NNT	NSS	NGT		NGS				NTT	NWS
A/Texas/UR06-0397/2007(H1N1)	NHT		NST	NHT	NIN	NNT	NSS	NGT		NGS				NTT	NWS
A/Texas/UR06-0398/2007(H1N1)	NHT		NST	NHT	NIN	NNT	NSS	NGT		NGS				NTT	NWS
A/Texas/UR06-0420/2007(H1N1)	NHT		NST	NHT	NIN	NNT	NSS	NGT		NGS				NTT	NWS
A/Texas/UR06-0422/2007(H1N1)	NHT		NST	NHT	NIN	NNT	NSS	NGT		NGS				NTT	NWS
A/Texas/UR06-0444/2007(H1N1)	NHT		NST	NHT	NIN	NNT	NSS	NGT		NGS				NTT	NWS
A/Texas/UR06-0445/2007(H1N1)	NHT		NST	NHT	NIN	NNT	NSS	NGT		NGS				NTT	-
A/Texas/UR06-0461/2007(H1N1)	NHT		NST	NHT	NIN	NNT	NSS	NGT		NGS				NAT	NWS
A/Texas/UR06-0467/2007(H1N1)	NHT		NST	NHT	NIN	NNT	NSS	NGT		NGS				NTT	N-
A/Texas/UR06-0468/2007(H1N1)	NHT		NST	NHT	NIN	NNT	NSS	NGT		NGS				NTT	NWS
A/Texas/UR06-0502/2007(H1N1)	NHT		NST	NHT	NIN	NNT	NSS	NGT		NGS				NTT	NWS
A/Texas/UR06-0503/2007(H1N1)	NHT		NST	NHT	NIN	NNT	NSS	NGT		NGS				NTT	NWS
A/Texas/UR06-0526/2007(H1N1)	NHT		NST	NHT	NIN	NNT	NSS	NGT		NGS				NTT	NWS
A/Texas/UR06-0540/2007(H1N1)	NHT		NST	NHT	NIN	NNT	NSS	NGT		NGS				NTT	NWS
A/Texas/UR06-0542/2007(H1N1)	NHT		NST	NHT	NIN	NNT	NSS	NGT		NGS				NTT	NWS
A/Texas/UR06-0563/2007(H1N1)	NHT		NST	NHT	NIN	NNT	NSS	NGT		NGS				NTT	NWS
A/Texas/UR06-0582/2007(H1N1)	NHT		NST	NHT	NIN	NNT	NSS	NGT		NGS				NTT	NWS
A/Ulaanbaatar/1094/2007(H1N1)	NHT		NST	NHT	NIN	NNT	NSS	NGT		NGS				NTT	N--
A/Ulaanbaatar/1809/2007(H1N1)	NHT		NST	NHT	NIN	NNT	NSS	NGT		NGS				NTT	NWS
A/Ulaanbaatar/1830/2007(H1N1)	NHT		NST	NHT	NIN	NNT	NSS	NGT		NGS				NTT	N--
A/Vermont/UR06-0035/2007(H1N1)	NHT		NST	NHT	NIN	NNT	NSS	NGT		NGS				NTT	NWS
A/Vermont/UR06-0050/2007(H1N1)	NHT		NST	NHT	NIN	NNT	NSS	NGT		NGS				NTT	NWS
A/Vermont/UR06-0051/2007(H1N1)	NHT		NST	NHT	NIN	NNT	NSS	NGT		NGS				NTT	NWS
A/Vermont/UR06-0089/2007(H1N1)	NHT		NST	NHT	NIN	NNT	NSS	NGT		NGS				NAT	NWS
A/Vermont/UR06-0090/2007(H1N1)	NHT		NST	NNT	NIN	NNT	NSS	NGT		NGS				NTT	NWS
A/Vermont/UR06-0301/2007(H1N1)	NHT		NST	NHT	NIN	NNT	NSS	NGT		NGS				NTT	NWS
A/Vermont/UR06-0330/2007(H1N1)	NHT		NST	NHT	NIN	NNT	NSS	NGT		NGS				NTT	NWS
A/Vermont/UR06-0472/2007(H1N1)	NHT		NST	NHT	NIN	NNT	NSS	NGT		NGS				NTT	NWS
A/Vermont/UR06-0485/2007(H1N1)	NHT		NST	NHT	NIN	NNT	NSS	NGT		NGS				NTT	NWS
A/Vermont/UR06-0511/2007(H1N1)	NHT		NST	NHT	NIN	NNT	NSS	NGT		NGS				NTT	NWS
A/Vermont/UR06-0513/2007(H1N1)	NHT		NST	NHT	NIN	NNT	NSS	NGT		NGS				NTT	NWS
A/Vermont/UR06-0556/2007(H1N1)	NHT		NST	NHT	NIN	NNT	NSS	NGT		NGS				NTT	NWS
A/Vermont/UR06-0573/2007(H1N1)	NHT		NST	NHT	NIN	NNT	NSS	NGT		NGS				NTT	NWS
A/Vermont/UR06-0574/2007(H1N1)	NHT		NST	NHT	NIN	NNT	NSS	NGT		NGS				NTT	NWS
A/Vermont/UR06-0575/2007(H1N1)	NHT		NST	NHT	NIN	NNT	NSS	NGT		NGS				NTT	NWS
A/Vermont/UR06-0576/2007(H1N1)	NHT		NST	NHT	NIN	NNT	NSS	NGT		NGS				NTT	NWS
A/Vienna/414/2007(H1N1)	NHT		NST	NHT	NIN	NNT	NSS	NGT		NGS				NTT	NWS
A/Virginia/UR06-0065/2007(H1N1)	NHT		NST	NHT	NIN	NNT	NSS	NGT		NGS				NTT	NWS
A/Virginia/UR06-0075/2007(H1N1)	NHT		NST	NHT	NIN	NNT	NSS	NGT		NGS				NTT	NWS
A/Virginia/UR06-0092/2007(H1N1)	NHT		NST	NHT	NIN	NNT	NSS	NGT		NGS				NTT	NWS
A/Virginia/UR06-0107/2007(H1N1)	NHT		NST	NHT	NIN	NNT	NSS	NGT		NGS				NTT	NWS
A/Virginia/UR06-0109/2007(H1N1)	NHT		NST	NHT	NIN	NNT	NSS	NGT		NGS				NTT	NWS
A/Virginia/UR06-0114/2007(H1N1)	NHT		NST	NHT	NIN	NNT	NSS	NGT		NGS				NTT	NWS
A/Virginia/UR06-0117/2007(H1N1)	NHT		NST	NHT	NIN	NNT	NSS	NGT		NGS				NTT	NWS
A/Virginia/UR06-0139/2007(H1N1)	NHT		NST	NHT	NIN	NNT	NSS	NGT		NGS				NTT	NWS
A/Virginia/UR06-0164/2007(H1N1)	NHT		NST	NHT	NIN	NNT	NSS	NGT		NGS				NTT	NWS
A/Virginia/UR06-0180/2007(H1N1)	NHT		NST	NHT	NIN	NNT	NSS	NGT		NGS				NTT	NWS
A/Virginia/UR06-0228/2007(H1N1)	NHT		NST	NHT	NIN	NNT	NSS	NGT		NGS				NTT	DWS
A/Virginia/UR06-0244/2007(H1N1)	NHT		NST	NHT	NIN	NNT	NSS	NGT		NGS				NTT	NWS
A/Virginia/UR06-0245/2007(H1N1)	NHT		NST	NHT	NIN	NNT	NSS	NGT		NGS				NTT	NWS
A/Virginia/UR06-0254/2007(H1N1)	NHT		NST	NHT	NIN	NNT	NSS	NGT		NGS				NTT	NWS
A/Virginia/UR06-0266/2007(H1N1)	NHT		NST	NHT	NIN	NNT	NSS	NGT		NGS				NTT	NWS
A/Virginia/UR06-0267/2007(H1N1)	NHT		NST	NHT	NIN	NNT	NSS	NGT		NGS				NTT	NWS
A/Virginia/UR06-0295/2007(H1N1)	NHT		NST	NHT	NIN	NNT	NSS	NGT		NGS				NTT	NWS
A/Virginia/UR06-0297/2007(H1N1)	NHT		NST	NHT	NIN	NNT	NSS	NGT		NGS				NTT	NWS
A/Virginia/UR06-0332/2007(H1N1)	NHT		NST	NHT	NIN	NNT	NSS	NGT		NGS				NTT	NWS
A/Virginia/UR06-0346/2007(H1N1)	NHT		NST	NHT	NIN	NNT	NSS	NGT		NGS				NTT	NWS
A/Virginia/UR06-0351/2007(H1N1)	NHT		NST	NHT	NIN	NNT	NSS	NGT		NGS				NTT	NWS
A/Virginia/UR06-0360/2007(H1N1)	NHT		NST	NHT	NIN	NNT	NSS	NGT		NGS				NTT	NWS
A/Virginia/UR06-0361/2007(H1N1)	NHT		NST	NHT	NIN	NNT	NSS	NGT		NGS	NGT			NTT	NWS
A/Virginia/UR06-0384/2007(H1N1)	NHT		NST	NHT	NIN	NNT	NSS	NGT		NGS				NTT	NWS
A/Virginia/UR06-0387/2007(H1N1)	NHT		NST	NHT	NIN	NNT	NSS	NGT		NGS				NTT	NWS
A/Virginia/UR06-0549/2007(H1N1)	NHT		NST	NHT	NIN	NNT	NSS	NGT		NGS				NTT	NWS	200 NGS
A/Virginia/UR06-0562/2007(H1N1)	NHT		NST	NHT	NIN	NNT	NSS	NGT		NGS				NTT	NWS
A/Virginia/UR06-0594/2007(H1N1)	NHT		NST	NHT	NIN	NNT	NSS	NGT		NGS				NTT	NWS
A/Washington/2404/2007(H1N1)	NHT		NST	NHT	NIN	NNT	NSS	NGT		NGS				NAT	NWS
A/Washington/2406/2007(H1N1)	NHT		NST	NHT	NIN	NNT	NSS	NGT		NGS				NTT	NWS
A/Washington/2412/2007(H1N1)	NHT		NST	NHT	NIN	NNT	NSS	NGT		NGS				NAT	NWS
A/Washington/5422/2007(H1N1)	NHT		NST	NHT	NIN	NNT	NSS	NGT		NGS				NTT	NWS
A/Yokohama/100/2007(H1N1)	NHT		NST	NHT	NIN	NNT	NSS	NGT		NGS				NTT	NWS
A/Yokohama/91/2007(H1N1)	NHT		NST	NHT	NIN	NNT	NSS	NGT		NGS				NTT	NWS
A/Alaska/11/2007(H1N1)	NNT		NST	NHT	NIN	NNT	NSS	NGT		NGS				NTT	NWS
A/Alaska/13/2007(H1N1)	NNT		NST	NHT	NIN	NNT	NSS	NGT		NGS				NTT	NWS
A/Arizona/03/2007(H1N1)	NNT		NST	NHT	NIN	NNT	NSS	NGT		NGS				NTT	NWS
A/Arizona/04/2007(H1N1)	NNT		NST	NHT	NIN	NNT	NSS	NGT		NGS				NTT	NWS
A/Arizona/07/2007(H1N1)	NNT		NST	NHT	NIN	NNT	NSS	NGT		NGS				NTT	NWS
A/Arizona/13/2007(H1N1)	NNT		NST	NHT	NIN	NNT	NSS	NGT		NGS				NTT	NWS
A/Arizona/14/2007(H1N1)	NNT		NST	NHT	NIN	NNT	NSS	NGT		NGS				NTT	NWS
A/Arizona/15/2007(H1N1)	NNT		NST	NHT	NIN	NNT	NSS	NGT		NGS				NTT	NWS
A/Brisbane/59/2007(H1N1)	NNT		NST	NHT	NIN	NNT	NSS	NGT		NGS				NTT	NWS
A/Brisbane/59/2007(H1N1)	NNT		NST	NHT	NIN	NNT	NSS	NGT		NGS				NTT	NWS
A/Brisbane/59/2007(H1N1)	NNT		NST	NHT	NIN	NNT	NSS	NGT		NGS				NTT	NWS
A/California/26/2007(H1N1)	NNT		NST	NHT	NIN	NNT	NSS	NGT		NGS				NTT	NWS
A/California/27/2007(H1N1)	NNT		NST	NHT	NIN	NNT	NSS	NGT		NGS				NTT	NWS
A/California/28/2007(H1N1)	NNT		NST	NHT	NIN	NNT	NSS	NGT		NGS				NTT	NWS
A/California/39/2007(H1N1)	NNT		NST	NHT	NIN	NNT	NSS	NGT		NGS				NTT	NWS
A/California/40/2007(H1N1)	NNT		NST	NHT	NIN	NNT	NSS	NGT		NGS				NTT	NWS
A/Canarias/RR-2915/2007(H1N1)	NNT		NST	NHT	NIN	NNT	NSS	NGT		NGS				NTT	NWS
A/Christchurch/62/2007(H1N1)	NNT		NST	NHT	NIN	NNT	NSS	NGT		NGS				NTT	NWS
A/Colorado/21/2007(H1N1)	NNT		NST	NHT	NIN	NNT	NSS	NGT		NGS				NTT	NWS
A/Colorado/25/2007(H1N1)	NNT		NST	NHT	NIN	NNT	NSS	NGT		NGS				NTT	NWS
A/Colorado/26/2007(H1N1)	NNT		NST	NHT	NIN	NNT	NSS	NGT		NGS				NTT	NWS
A/Colorado/27/2007(H1N1)	NNT		NST	NHT	NIN	NNT	NSS	NGT		NGS				NTT	NWS
A/Colorado/33/2007(H1N1)	NNT		NST	NHT	NIN	NNT	NSS	NGT		NGS				NTT	NWS
A/Colorado/39/2007(H1N1)	NNT		NST	NHT	NIN	NNT	NSS	NGT		NGS				NTT	NWS
A/Denmark/22/2007(H1N1)	NNT		NST	NHT	NIN	NNT	NSS	NGT		NGS				NTT	NWS
A/Denmark/27/2007(H1N1)	NNT		NST	NHT	NIN	NNT	NSS	NGT		NGS				NTT	NWS
A/Denmark/27/2007(H1N1)	NNT		NST	NHT	NIN	NNT	NSS	NGT		NGS				NTT	NWS
A/Denmark/28/2007(H1N1)	NNT		NST	NHT	NIN	NNT	NSS	NGT		NGS				NTT	NWS
A/England/545/2007(H1N1)	NNT		NST	NHT	NIN	NNT	NSS	NGT		NGS				NTT	NWS
A/England/545/2007(H1N1)	NNT		NST	NHT	NIN	NNT	NSS	NGT		NGS				NTT	NWS
A/England/557/2007(H1N1)	NNT		NST	NHT	NIN	NNT	NSS	NGT		NGS				NTT	NWS
A/England/557/2007(H1N1)	NNT		NST	NHT	NIN	NNT	NSS	NGT		NGS				NTT	NWS
A/England/654/2007(H1N1)	NNT		NST	NHT	NIN	NNT	NSS	NGT		NGS				NTT	NWS
A/England/684/2007(H1N1)	NNT		NST	NHT	NIN	NNT	NSS	NGT		NGS				NTT	NWS
A/Florida/05/2007(H1N1)	NNT		NST	NHT	NIN	NNT	NSS	NGT		NGS				NTT	NWS
A/Florida/10/2007(H1N1)	NNT		NST	NHT	NIN	NNT	NSS	NGT		NGS				NTT	NWS
A/Florida/12/2007(H1N1)	NNT		NST	NHT	NIN	NNT	NSS	NGT		NGS				NTT	NWS
A/Florida/13/2007(H1N1)	NNT		NST	NHT	NIN	NNT	NSS	NGT		NGS				NTT	NWS
A/Florida/15/2007(H1N1)	NNT		NST	NHT	NIN	NNT	NSS	NGT		NGS				NTT	NWS
A/Florida/15/2007(H1N1)	NNT		NST	NHT	NIN	NNT	NSS	NGT		NGS				NTT	NWS
A/Florida/19/2007(H1N1)	NNT		NST	NHT	NIN	NNT	NSS	NGT		NGS				NTT	NWS
A/Florida/19/2007(H1N1))	NNT		NST	NHT	NIN	NNT	NSS	NGT		NGS				NTT	NWS
A/Gunma/07G001/2007(H1N1)	NNT		NST	NHT	NIN	NNT	NSS	NGT		NGS				NTT	NWS
A/Hamedan/117/2007(H1N1)	NNT		NST	NHT	NIN	NNT	NSS	NRT		NGS				NTT	NWS
A/Hawaii/18/2007(H1N1)	NNT		NST	NHT	NIN	NNT	NSS	NGT		NGS				NTT	NWS
A/Hawaii/20/2007(H1N1)	NNT		NST	NHT	NIN	NNT	NSS	NGT		NGS				NTT	NWS
A/Hawaii/21/2007(H1N1)	NNT		NST	NHT	NIN	NNT	NSS	NGT		NGS				NTT	NWS
A/Hawaii/28/2007(H1N1)	NNT		NST	NHT	NIN	NNT	NSS	NGT		NGS				NTT	NWS
A/Hawaii/28/2007(H1N1)	NNT		NST	NHT	NIN	NNT	NSS	NGT		NGS				NTT	NWS
A/Hawaii/28/2007(H1N1)	NNT		NST	NHT	NIN	NNT	NSS	NGT		NGS				NTT	NWS
A/Hawaii/31/2007(H1N1)	NNT		NST	NHT	NIN	NNT	NSS	NGT		NGS				NTT	NWS
A/Hawaii/31/2007(H1N1)	NNT		NST	NHT	NIN	NNT	NSS	NGT		NGS				NTT	NWS
A/Hawaii/35/2007(H1N1)	NNT		NST	NHT	NIN	NNT	NSS	NGT		NGS				NTT	NWS
A/Hawaii/39/2007(H1N1)	NNT		NST	NHT	NIN	NNT	NSS	NGT		NGS				NTT	NWS
A/Hawaii/39/2007(H1N1)	NNT		NST	NHT	NIN	NNT	NSS	NGT		NGS				NTT	NWS
A/Hokkaido/07H002/2007(H1N1)	NNT		NST	NHT	NIN	NNT	NSS	NGT		NGS				NTT	NWS
A/Hokkaido/07H007/2007(H1N1)	NNT		NST	NHT	NIN	NNT	NSS	NGT		NGS				NTT	NWS
A/Hokkaido/07H012/2007(H1N1)	NNT		NST	NHT	NIN	NNT	NSS	NGT		NGS				NTT	NWS
A/Hyogo/07K030/2007(H1N1)	NNT		NST	NHT	NIN	NNT	NSS	NGT		NGS				NTT	NWS
A/Idaho/11/2007(H1N1)	NNT		NST	NHT	NIN	NNT	NSS	NGT		NGS				NTT	NWS
A/Illinois/10/2007(H1N1)	NNT		NST	NHT	NIN	NNT	NSS	NGT		NGS				NTT	NWS
A/Illinois/11/2007(H1N1)	NNT		NST	NHT	NIN	NNT	NSS	NGT		NGS				NTT	NWS
A/Illinois/13/2007(H1N1))	NNT		NST	NHT	NIN	NNT	NSS	NGT		NGS				NTT	NWS
A/Illinois/15/2007(H1N1)	NNT		NST	NHT	NIN	NNT	NSS	NGT		NGS				NTT	NWS
A/Illinois/16/2007(H1N1)	NNT		NST	NHT	NIN	NNT	NSS	NGT		NGS				NTT	NWS
A/Illinois/17/2007(H1N1)	NNT		NST	NHT	NIN	NNT	NSS	NGT		NGS				NTT	NWS
A/Iowa/04/2007(H1N1)	NNT		NST	NHT	NIN	NNT	NSS	NGT		NGS				NTT	NWS
A/Kenya/9309/2007(H1N1)	NNT		NST	NHT	NIN	NNT	NSS	NGT		NGS				NTT	NWS
A/Kyoto/07K004/2007(H1N1)	NNT		NST	NHT	NIN	NNT	NSS	NGT		NGS				NTT	NWS
A/Lyon/1337/2007(H1N1)	NNT		NST	NHT	NIN	NNT	NSS	NGT		NGS				NTT	NWS
A/Maryland/04/2007(H1N1)	NNT		NST	NHT	NIN	NNT	NSS	NGT		NGS				NTT	NWS
A/Massachusetts/14/2007(H1N1)	NNT		NST	NHT	NIN	NNT	NSS	NGT		NGS				NTT	NWS
A/Mississippi/UR06-0378/2007(H1N1)	NNT		NST	NHT	NIN	NNT	NSS	NGT		NGS				NTT	NWS
A/New Jersey/15/2007(H1N1)	NNT		NST	NHT	NIN	NNT	NSS	NGT		NGS				NTT	NWS
A/New Jersey/15/2007(H1N1)	NNT		NST	NHT	NIN	NNT	NSS	NGT		NGS				NTT	NWS
A/New Jersey/16/2007(H1N1)	NNT		NST	NHT	NIN	NNT	NSS	NGT		NGS				NTT	NWS
A/New Jersey/20/2007(H1N1)	NNT		NST	NHT	NIN	NNT	NSS	NGT		NGS				NTT	NWS
A/New Mexico/07/2007(H1N1)	NNT		NST	NHT	NIN	NNT	NSS	NGT		NGS				NTT	NWS
A/New York/16/2007(H1N1)	NNT		NST	NHT	NIN	NNT	NSS	NGT		NGS				NTT	NWS
A/North Dakota/05/2007(H1N1)	NNT		NST	NHT	NIN	NNT	NSS	NGT		NGS				NTT	NWS
A/Norway/1729/2007(H1N1)	NNT		NST	NHT	NIN	NNT	NSS	NGT		NGS				NTT	NWS
A/Norway/1736/2007(H1N1)	NNT		NST	NHT	NIN	NNT	NSS	NGT		NGS				NTT	NWS
A/Norway/1758/2007(H1N1)	NNT		NST	NHT	NIN	NNT	NSS	NGT		NGS				NTT	NWS
A/Nyiregyhaza/01/2007(H1N1)	NNT		NST	NHT	NIN	NNT	NSS	NGT		NGS				NTT	NWS
A/Paris/286/2007(H1N1)	NNT		NST	NHT	NIN	NNT	NSS	NGT		NGS				NTT	NWS
A/Paris/341/2007(H1N1)	NNT		NST	NHT	NIN	NNT	NSS	NGT		NGS				NTT	NWS
A/Paris/438/2007(H1N1)	NNT		NST	NHT	NIN	NNT	NSS	NGT		NGS				NTT	NWS
A/Paris/497/2007(H1N1)	NNT		NST	NHT	NIN	NNT	NSS	NGT		NGS				NTT	NWS
A/Paris/546/2007(H1N1)	NNT		NST	NHT	NIN	NNT	NSS	NGT		NGS				NTT	NWS
A/Paris/611/2007(H1N1)	NNT		NST	NHT	NIN	NNT	NSS	NGT		NGS				NTT	NWS
A/Paris/644/2007(H1N1)	NNT		NST	NHT	NIN	NNT	NSS	NGT		NGS				NTT	NWS
A/Paris/658/2007(H1N1)	NNT		NST	NHT	NIN	NNT	NSS	NGT		NGS				NTT	NWS
A/Paris/749/2007(H1N1))	NNT		NST	NHT	NIN	NNT	NSS	NGT		NGS				NTT	NWS
A/Paris/814/2007(H1N1)	NNT		NST	NHT	NIN	NNT	NSS	NGT		NGS				NTT	NWS
A/Paris/910/2007(H1N1)	NNT		NST	NHT	NIN	NNT	NSS	NGT		NGS				NTT	NWS
A/Pennsylvania/10/2007(H1N1)	NNT		NST	NHT	NIN	NNT	NSS	NGT		NGS				NTT	NWS
A/Pennsylvania/11/2007(H1N1)	NNT		NST	NHT	NIN	NNT	NSS	NGT		NGS				NTT	NWS
A/Pennsylvania/11/2007(H1N1)	NNT		NST	NHT	NIN	NNT	NSS	NGT		NGS				NTT	NWS
A/Pennsylvania/13/2007(H1N1)	NNT		NST	NHT	NIN	NNT	NSS	NGT		NGS				NTT	NWS
A/Pennsylvania/14/2007(H1N1)	NNT		NST	NHT	NIN	NNT	NSS	NGT		NGS				NTT	NWS
A/Pennsylvania/14/2007(H1N1)	NNT		NST	NHT	NIN	NNT	NSS	NGT		NGS				NTT	NWS
A/Pennsylvania/15/2007(H1N1)	NNT		NST	NHT	NIN	NNT	NSS	NGT		NGS				NTT	NWS
A/Pennsylvania/16/2007(H1N1)	NNT		NST	NHT	NIN	NNT	NSS	NGT		NGS				NTT	NWS
A/Pennsylvania/16/2007(H1N1)	NNT		NST	NHT	NIN	NNT	NSS	NGT		NGS				NTT	NWS
A/Scotland/5/2007(H1N1)	NNT		NST	NHT	NIN	NNT	NSS	NGT		NGS				NTT	NWS
A/South Dakota/06/2007(H1N1)	NNT		NST	NHT	NIN	NNT	NSS	NGT		NGS				NTT	NWS
A/South Dakota/06/2007(H1N1)	NNT		NST	NHT	NIN	NNT	NSS	NGT		NGS				NTT	NWS
A/South Dakota/06/2007(H1N1)	NNT		NST	NHT	NIN	NNT	NSS	NGT		NGS				NTT	NWS
A/Sydney/142/2007(H1N1)	NNT		NST	NHT	NIN	NNT	NSS	NGT		NGS				NTT	NWS
A/Taiwan/71720/2007(H1N1)	NNT		NST	NHT	NIN	NNT	NSS	NGT		NGS				NTT	NWS
A/Tehran/105/2007(H1N1)	NNT		NST	NHT	NIN	NNT	NSS	NGT		NGS				NTT	NWS
A/Tehran/250/2007(H1N1)	NNT		NST	NHT	NIN	NNT	NSS	NGT		NGS				NTT	NWS
A/Tennessee/UR06-0045/2007(H1N1)	NNT		NST	NHT	NIN	NNT	NSS	NGT		NGS				NTT	NWS
A/Tennessee/UR06-0055/2007(H1N1)	NNT		NST	NHT	NIN	NNT	NSS	NGT		NGS				NTT	NWS
A/Texas/05/2007(H1N1)	NNT		NST	NHT	NIN	NNT	NSS	NGT		NGS				NTT	NWS
A/Texas/32/2007(H1N1)	NNT		NST	NHT	NIN	NNT	NSS	NGT		NGS				NTT	NWS
A/Texas/41/2007(H1N1)	NNT		NST	NHT	NIN	NNT	NSS	NGT		NGS				NTT	NWS
A/Texas/70/2007(H1N1)	NNT		NST	NHT	NIN	NNT	NSS	NGT		NGS				NTT	NWS
A/Texas/74/2007(H1N1)	NNT		NST	NHT	NIN	NNT	NSS	NRT		NGS				NTT	NWS
A/Texas/78/2007(H1N1)	NNT		NST	NHT	NIN	NNT	NSS	NGT		NGS				NTT	NWS
A/Texas/UR06-0217/2007(H1N1)	NNT		NST	NHT	NIN	NNT	NSS	NGT		NGS				NTT	NWS
A/Thailand/500/2007(H1N1)	NNT		NST	NHT	NIN	NNT	NSS	NGT		NGS				NTT	NWS
A/Thailand/501/2007(H1N1)	NNT		NST	NHT	NIN	NNT	NSS	NGT		NGS				NTT	NWS
A/Turkey/1558/2007(H1N1)	NNT		NST	NHT	NIN	NNT	NSS	NGT		NGS				NTT	NWS
A/Victoria/07159220/2007(H1N1)	NNT		NST	NHT	NIN	NNT	NSS	NGT		NGS				NTT	NWS
A/Washington/27/2007(H1N1)	NNT		NST	NHT	NIN	NNT	NSS	NGT		NGS				NTT	NWS
A/Washington/28/2007(H1N1)	NNT		NST	NHT	NIN	NNT	NSS	NGT		NGS				NTT	NWS
A/Washington/28/2007(H1N1)	NNT		NST	NHT	NIN	NNT	NSS	NGT		NGS				NTT	NWS
A/Washington/33/2007(H1N1)	NNT		NST	NHT	NIN	NNT	NSS	NGT		NGS				NTT	NWS
A/Washington/34/2007(H1N1)	NNT		NST	NHT	NIN	NNT	NSS	NGT		NGS				NTT	NWS
A/Washington/40/2007(H1N1)	NNT		NST	NHT	NIN	NNT	NSS	NGT		NGS				NTT	NWS
A/Washington/AF06/2007(H1N1)	NNT		NST	NHT	NIN	NNT	NSS	NGT		NGS				NTT	NWS
A/Wisconsin/35/2007(H1N1)	NNT		NST	NHT	NIN	NNT	NSS	NGT		NGS	NKS			NTT	NWS
A/Wisconsin/36/2007(H1N1)	NNT		NST	NHT	NIN	NNT	NSS	NGT		NGS				NTT	NWS
A/Austria/406721/2008(H1N1)	NNT		NST	NHT	NIN	NNT	NSS	NGT		NGS				NTT	NWS
A/Hong Kong/179/2008(H1N1)	NNT		NST	NHT	NIN	NNT	NSS	NGT		NGS				NTT	NWS
A/Johannesburg/36/2008(H1N1)	NNT		NST	NHT	NIN	NNT	NSS	NGT		NGS				NTT	NWS
A/Kyoto/07K415/2008(H1N1)	NNT		NST	NHT	NIN	NNT	NSS	NGT	NRS	NGS				NTT	NWS
A/Paris/1154/2008(H1N1)	NNT		NST	NHT	NIN	NNT	NSS	NGT		NGS				NTT	NWS
A/Alaska/02/2008(H1N1)	NNT		NST	NHT	NIN	NNT	NSS	NGT		NGS				NTT	NWS
A/Alaska/03/2008(H1N1)	NNT		NST	NHT	NIN	NNT	NSS	NGT		NGS				NTT	NWS
A/Alaska/05/2008(H1N1)	NNT		NST	NHT	NIN	NNT	NSS	NGT		NGS				NTT	NWS
A/Arizona/13/2008(H1N1)	NHT		NST	NHT	NIN	NNT	NSS	NGT		NGS				NAT	NWS
A/Arizona/13/2008(H1N1)	NST		NST	NHT	NIN	NNT	NSS	NGT		NGS				NTT	NWS
A/Athens/41/2008(H1N1)	NNT		NST	NHT	NIN	NNT	NSS	NGT		NGS				NTT	NWS
A/Austria/401927/2008(H1N1)	NNT		NST	NHT	NIN	NNT	NSS	NGT		NGS				NTT	NWS
A/Austria/402127/2008(H1N1)	NNT		NST	NHT	NIN	NNT	NSS	NGT		NGS				NTT	NWS
A/Austria/402129/2008(H1N1)	NNT		NST	NHT	NIN	NNT	NSS	NGT		NGS				NTT	NWS
A/Austria/402133/2008(H1N1)	NNT		NST	NHT	NIN	NNT	NSS	NGT		NGS				NTT	NWS
A/Austria/402641/2008(H1N1)	NNT		NST	NHT	NIN	NNT	NSS	NGT		NGS				NTT	NWS
A/Austria/402642/2008(H1N1)	NNT		NST	NHT	NIN	NNT	NSS	NGT		NGS				NTT	NWS
A/Austria/402647/2008(H1N1)	NNT		NST	NHT	NIN	NNT	NSS	NGT		NGS				NTT	NWS
A/Austria/402937/2008(H1N1)	NNT		NST	NHT	NIN	NNT	NSS	NGT		NGS				NTT	NWS
A/Austria/402939/2008(H1N1)	NNT		NST	NHT	NIN	NNT	NSS	NGT		NGS				NTT	NWS
A/Austria/402941/2008(H1N1)	NNT		NST	NHT	NIN	NNT	NSS	NGT		NGS				NTT	NWS
A/Austria/402943/2008(H1N1)	NNT		NST	NHT	NIN	NNT	NSS	NGT		NGS				NTT	NWS
A/Austria/402944/2008(H1N1)	NNT		NST	NHT	NIN	NNT	NSS	NGT		NGS				NTT	NWS
A/Austria/403615/2008(H1N1)	NNT		NST	NHT	NIN	NNT	NSS	NGT		NGS				NTT	NWS
A/Austria/403617/2008(H1N1)	NNT		NST	NHT	NIN	NNT	NSS	NGT		NGS				NTT	NWS
A/Austria/403621/2008(H1N1)	NNT		NST	NHT	NIN	NNT	NSS	NGT		NGS				NTT	NWS
A/Austria/403625/2008(H1N1)	NNT		NST	NHT	NIN	NNT	NSS	NGT		NGS				NTT	NWS
A/Austria/403908/2008(H1N1)	NNT		NST	NHT	NIN	NNT	NSS	NGT		NGS				NTT	NWS
A/Austria/403912/2008(H1N1)	NNT		NST	NHT	NIN	NNT	NSS	NGT		NGS				NTT	NWS
A/Austria/403918/2008(H1N1)	NNT		NST	NHT	NIN	NNT	NSS	NGT		NGS				NTT	NWS
A/Austria/403918/2008(H1N1)	NNT		NST	NHT	NIN	NNT	NSS	NGT		NGS				NTT	NWS
A/Austria/404287/2008(H1N1)	NNT		NST	NHT	NIN	NNT	NSS	NGT		NGS				NTT	NWS
A/Austria/404337/2008(H1N1)	NNT		NST	NHT	NIN	NNT	NSS	NGT		NGS				NTT	NWS
A/Austria/404339/2008(H1N1)	NNT		NST	NHT	NIN	NNT	NSS	NGT		NGS				NTT	NWS
A/Austria/404340/2008(H1N1)	NNT		NST	NHT	NIN	NNT	NSS	NGT		NGS				NTT	NWS
A/Austria/404342/2008(H1N1)	NNT		NST	NHT	NIN	NNT	NSS	NGT		NGS				NTT	NWS
A/Austria/404343/2008(H1N1)	NNT		NST	NHT	NIN	NNT	NSS	NGT		NGS				NTT	NWS
A/Austria/404579/2008(H1N1)	NNT		NST	NHT	NIN	NNT	NSS	NGT		NGS				NTT	NWS
A/Austria/404584/2008(H1N1)	NNT		NST	NHT	NIN	NNT	NSS	NGT		NGS				NTT	NWS
A/Austria/404586/2008(H1N1)	NNT		NST	NHT	NIN	NNT	NSS	NGT		NGS				NTT	NWS
A/Austria/404596/2008(H1N1)	NNT		NST	NHT	NIN	NNT	NSS	NGT		NGS				NTT	NWS
A/Austria/404738/2008(H1N1)	NHT		NST	NHT	NIN	NNT	NSS	NGT		NGS				NTT	NWS
A/Austria/404740/2008(H1N1)	NHT		NST	NHT	NIN	NNT	NSS	NGT		NGS				NTT	NWS
A/Austria/404794/2008(H1N1)	NNT		NST	NHT	NIN	NNT	NSS	NGT		NGS				NTT	NWS
A/Austria/404804/2008(H1N1)	NNT		NST	NHT	NIN	NNT	NSS	NGT		NGS				NTT	NWS
A/Austria/404805/2008(H1N1)	NNT		NST	NHT	NIN	NNT	NSS	NGT		NGS				NTT	NWS
A/Austria/404811/2008(H1N1)	NNT		NST	NHT	NIN	NNT	NSS	NGT		NGS				NTT	NWS
A/Austria/404811/2008(H1N1)	NNT		NST	NHT	NIN	NNT	NSS	NRT		NGS				NTT	NWS
A/Austria/404812/2008(H1N1)	NNT		NST	NHT	NIN	NNT	NSS	NGT		NGS				NTT	NWS
A/Austria/404817/2008(H1N1)	NNT		NST	NHT	NIN	NNT	NSS	NGT		NGS				NTT	NWS
A/Austria/404821/2008(H1N1)	NNT		NST	NHT	NIN	NNT	NSS	NRT		NGS				NTT	NWS
A/Austria/404822/2008(H1N1)	NNT		NST	NHT	NIN	NNT	NSS	NGT		NGS				NTT	NWS
A/Austria/405153/2008(H1N1)	NNT		NST	NHT	NIN	NNT	NSS	NGT		NGS				NTT	NWS
A/Austria/405156/2008(H1N1)	NNT		NST	NHT	NIN	NNT	NSS	NGT		NGS				NTT	NWS
A/Austria/405173/2008(H1N1)	NNT		NST	NHT	NIN	NNT	NSS	NGT		NGS				NTT	NWS
A/Austria/405174/2008(H1N1)	NNT		NST	NHT	NIN	NNT	NSS	NGT		NGS				NTT	NWS
A/Austria/405177/2008(H1N1)	NHT		NST	NHT	NIN	NNT	NSS	NGT		NGS				NTT	NWS	158 NNS
A/Austria/405179/2008(H1N1)	NNT		NST	NHT	NIN	NNT	NSS	NRT		NGS				NTT	NCS
A/Austria/405501/2008(H1N1)	NNT		NST	NHT	NIN	NNT	NSS	NGT		NGS				NTT	NWS
A/Austria/405507/2008(H1N1)	NNT		NST	NHT	NIN	NNT	NSS	NGT		NGS				NTT	NWS
A/Austria/405824/2008(H1N1)	NNT		NST	NHT	NIN	NNT	NSS	NGT		NGS				NTT	NWS
A/Austria/405830/2008(H1N1)	NNT		NST	NHT	NIN	NNT	NSS	NGT		NGS				NTT	NWS
A/Austria/405832/2008(H1N1)	NNT		NST	NHT	NIN	NNT	NSS	NGT		NGS				NTT	NWS	307 NQT
A/Austria/405834/2008(H1N1)	NNT		NST	NHT	NIN	NNT	NSS	NGT		NGS				NTT	NWS
A/Austria/405836/2008(H1N1)	NNT		NST	NHT	NIN	NNT	NSS	NGT		NGS				NTT	NWS
A/Austria/405845/2008(H1N1)	NNT		NST	NHT	NIN	NNT	NSS	NGT		NGS				NTT	NWS
A/Austria/406109/2008(H1N1)	NNT		NST	NHT	NIN	NNT	NSS	NRT		NGS				NTT	NWS
A/Austria/406113/2008(H1N1)	NNT		NST	NHT	NIN	NNT	NSS	NGT		NGS				NTT	NWS
A/Austria/406118/2008(H1N1)	NNT		NST	NHT	NIN	NNT	NSS	NGT		NGS				NTT	NWS
A/Austria/406119/2008(H1N1)	NNT		NST	NHT	NIN	NNT	NSS	NGT		NGS				NTT	NWS
A/Austria/406430/2008(H1N1)	NNT		NST	NHT	NIN	NNT	NSS	NGT		NGS				NTT	NWS
A/Austria/406434/2008(H1N1)	NNT		NST	NHT	NIN	NNT	NSS	NGT		NGS				NTT	NWS
A/Austria/406437/2008(H1N1)	NNT		NST	NHT	NIN	NNT	NSS	NGT		NGS				NTT	NWS
A/Austria/406447/2008(H1N1)	NNT		NST	NHT	NIN	NNT	NSS	NGT		NGS				NTT	NWS
A/Austria/406448/2008(H1N1)	NNT		NST	NHT	NIN	NNT	NSS	NGT		NGS				NTT	NWS
A/Austria/406449/2008(H1N1)	NNT		NST	NHT	NIN	NNT	NSS	NGT		NGS				NTT	NWS
A/Austria/406707/2008(H1N1)	NNT		NST	NHT	NIN	NNT	NSS	NGT		NGS				NTT	---
A/Austria/406724/2008(H1N1)	NNT		NST	NHT	NIN	NNT	NSS	NGT		NGS				NTT	NWS
A/Austria/406725/2008(H1N1)	NNT		NST	NHT	NIN	NNT	NSS	NGT		NGS				NTT	NWS
A/Austria/406726/2008(H1N1)	NNT		NST	NHT	NIN	NNT	NSS	NGT		NGS				NTT	NWS
A/Austria/406735/2008(H1N1)	NNT		NST	NHT	NIN	NNT	NSS	NGT		NGS				NTT	NWS
A/Austria/407000/2008(H1N1)	NNT		NST	NHT	NIN	NNT	NSS	NGT		NGS				NTT	NWS
A/Austria/407001/2008(H1N1)	NNT		NST	NHT	NIN	NNT	NSS	NGT		NGS				NTT	NWS
A/Austria/407003/2008(H1N1)	NNT		NST	NHT	NIN	NNT	NSS	NGT		NGS				NTT	NWS
A/Austria/407004/2008(H1N1)	NNT		NST	NHT	NIN	NNT	NSS	NGT		NGS				NTT	NWS
A/Austria/407005/2008(H1N1)	NNT		NST	NHT	NIN	NNT	NSS	NGT		NGS				NTT	NWS
A/Austria/407009/2008(H1N1)	NNT		NST	NHT	NIN	NNT	NSS	NGT		NGS				NTT	NWS
A/Austria/407236/2008(H1N1)	NNT		NST	NHT	NIN	NNT	NSS	NGT		NGS				NTT	NWS
A/Austria/407249/2008(H1N1)	NNT		NST	NHT	NIN	NNT	NSS	NGT		NGS				NTT	NWS
A/Austria/407251/2008(H1N1)	NNT		NST	NHT	NIN	NNT	NSS	NGT		NGS				NTT	NWS
A/Austria/407252/2008(H1N1)	NNT		NST	NHT	NIN	NNT	NSS	NGT		NGS				NTT	NWS
A/Austria/407253/2008(H1N1)	NNT		NST	NHT	NIN	NNT	NSS	NGT		NGS				NTT	NWS
A/Austria/407255/2008(H1N1)	NNT		NST	NHT	NIN	NNT	NSS	NGT		NGS				NTT	N--
A/Austria/407259/2008(H1N1)	NNT		NST	NHT	NIN	NNT	NSS	NGT		NGS				NTT	NWS
A/Austria/407262/2008(H1N1)	NNT		NST	NHT	NIN	NNT	NSS	NGT		NGS				NTT	NWS
A/Austria/407263/2008(H1N1)	NNT		NST	NHT	NIN	NNT	NSS	NGT		NGS				NTT	NWS
A/Austria/407490/2008(H1N1)	NNT		NST	NHT	NIN	NNT	NSS	NGT		NGS				NTT	NWS
A/Austria/407491/2008(H1N1)	NNT		NST	NHT	NIN	NNT	NSS	NGT		NGS				NTT	NWS
A/Austria/407493/2008(H1N1)	NNT		NST	NHT	NIN	NNT	NSS	NGT		NGS				NTT	NWS
A/Austria/407516/2008(H1N1)	NNT		NST	NHT	NIN	NNT	NSS	NGT		NGS				NTT	NWS
A/Austria/407517/2008(H1N1)	NNT		NST	NHT	NIN	NNT	NSS	NGT		NGS				NTT	NWS
A/Austria/407528/2008(H1N1)	NNT		NST	NHT	NIN	NNT	NSS	NGT		NGS				NTT	NWS
A/Austria/407530/2008(H1N1)	NNT		NST	NHT	NIN	NNT	NSS	NGT		NGS				NTT	NWS
A/Austria/407778/2008(H1N1)	NNT		NST	NHT	NIN	NNT	NSS	NGT		NGS				NTT	NWS
A/Austria/407780/2008(H1N1)	NNT		NST	NHT	NIN	NNT	NSS	NGT		NGS				NTT	NWS
A/Austria/407782/2008(H1N1)	NNT		NST	NHT	NIN	NNT	NSS	NGT		NGS				NTT	NWS
A/Austria/407784/2008(H1N1)	NNT		NST	NHT	NIN	NNT	NSS	NGT		NGS				NTT	NWS
A/Austria/408086/2008(H1N1)	NNT		NST	NHT	NIN	NNT	NSS	NGT		NGS				NTT	NWS
A/Austria/408089/2008(H1N1)	NNT		NST	NHT	NIN	NNT	NSS	NGT		NGS				NTT	NWS
A/Austria/408094/2008(H1N1)	NNT		NST	NHT	NIN	NNT	NSS	NGT		NGS				NTT	NWS
A/Austria/408099/2008(H1N1)	NNT		NST	NHT	NIN	NNT	NSS	NGT		NGS				NTT	NWS
A/Austria/408417/2008(H1N1)	NNT		NST	NHT	NIN	NNT	NSS	NGT		NGS				NTT	NWS
A/Barcelona/00083/2008(H1N1)	NNT		NST	NHT	NIN	NNT	NSS	NGT		NGS				NTT	NWS
A/Belgium/G257/2008(H1N1)	NNT		NST	NHT	NIN	NNT	NSS	NGT		NGS				NTT	NWS
A/Berlin/1/08(H1N1)	NNT		NST	NHT	NIN	NNT	NSS	NGT		NGS				NTT	NWS
A/Berlin/47/2008(H1N1)	NNT		NST	NHT	NIN	NNT	NSS	NGT		NGS				NTT	NWS
A/Boston/12/2008(H1N1)	NNT		NST	NHT	NIN	NNT	NSS	NGT		NGS				NTT	NWS
A/Boston/26/2008(H1N1)	NNT		NST	NHT	NIN	NNT	NSS	NGT		NGS				NTT	NWS
A/Boston/27/2008(H1N1)	NNT		NST	NHT	NIN	NNT	NSS	NGT		NGS				NTT	NWS
A/Boston/34/2008(H1N1)	NNT		NST	NHT	NIN	NNT	NSS	NGT		NGS				NTT	NWS
A/Boston/35/2008(H1N1)	NNT		NST	NHT	NIN	NNT	NSS	NGT		NGS				NTT	NWS
A/Boston/49/2008(H1N1)	NNT		NST	NHT	NIN	NNT	NSS	NGT		NGS				NTT	NWS
A/Boston/52/2008(H1N1)	NNT		NST	NHT	NIN	NNT	NSS	NGT		NGS				NTT	NWS
A/Bucuresti/137/2008(H1N1)	NNT		NST	NHT	NIN	NNT	NSS	NGT		NGS				NTT	NWS
A/Bucuresti/229/2008(H1N1)	NNT		NST	NHT	NIN	NNT	NSS	NGT		NGS				NTT	NWS
A/Bulgaria/155/2008(H1N1)	NNT		NST	NHT	NIN	NNT	NSS	NGT		NGS				NTT	NWS
A/California/05/2008(H1N1)	NNT		NST	NHT	NIN	NNT	NSS	NXT		NGS				NTT	NWS
A/California/06/2008(H1N1)	NHT		NST	NHT	NIN	NNT	NSS	NGT		NGS				NTT	NWS
A/California/07/2008(H1N1)	NHT		NST	NHT	NIN	NNT	NSS	NGT		NGS				NTT	NWS
A/California/11/2008(H1N1)	NHT		NST	NHT	NIN	NNT	NSS	NGT		NGS				NTT	NWS
A/Canada/35/2008(H1N1)	NNT		NST	NHT	NIN	NNT	NSS	NGT		NGS				GAT	AWS
A/CapeTown/26/2008(H1N1)	NNT		NNT	NHT	NIN	NNT	NSS	NGT		NGS				NTT	NWS
A/Colorado/01/2008(H1N1)	NNT		NST	NHT	NIN	NNT	NSS	NGT		NGS				NTT	NWS
A/Colorado/08/2008(H1N1)	NNT		NST	NHT	NIN	NNT	NSS	NGT		NGS				NTT	NWS
A/Colorado/17/2008(H1N1)	NNT		NST	NHT	NIN	NNT	NSS	NGT		NGS				NTT	NWS
A/Colorado/17/2008(H1N1)	NNT		NST	NHT	NIN	NNT	NSS	NGT		NGS				NTT	NWS
A/Delaware/01/2008(H1N1)	NNT		NST	NHT	NIN	NNT	NSS	NGT		NGS				NTT	NWS
A/Denmark/01/2008(H1N1)	NNT		NST	NHT	NIN	NNT	NSS	NGT		NGS				NTT	NWS
A/Denmark/02/2008(H1N1)	NNT		NST	NHT	NIN	NNT	NSS	NGT		NGS				NTT	NWS
A/Denmark/04/2008(H1N1)	NNT		NST	NHT	NIN	NNT	NSS	NGT		NGS				NTT	NWS
A/Denmark/05/2008(H1N1)	NNT		NST	NHT	NIN	NNT	NSS	NGT		NGS				NTT	NWS
A/Denmark/06/2008(H1N1)	NNT		NST	NHT	NIN	NNT	NSS	NGT		NGS				NTT	NWS
A/Denmark/07/2008(H1N1)	NNT		NST	NHT	NIN	NNT	NSS	NGT		NGS				NTT	NWS
A/Denmark/09/2008(H1N1)	NNT		NST	NHT	NIN	NNT	NSS	NGT		NGS				NTT	NWS
A/Denmark/122/2008(H1N1)	NNT		NST	NHT	NIN	NNT	NSS	NGT		NGS				NTT	NWS
A/Denmark/13/2008(H1N1)	NNT		NST	NHT	NIN	NNT	NSS	NGT		NGS				NTT	NWS
A/Denmark/14/2008(H1N1)	NNT		NST	NHT	NIN	NNT	NSS	NGT		NGS				NTT	NWS
A/Denmark/15/2008(H1N1)	NNT		NST	NHT	NIN	NNT	NSS	NGT		NGS				NTT	NWS
A/Denmark/151/2008(H1N1)	NNT		NST	NHT	NIN	NNT	NSS	NGT		NGS				NTT	NWS
A/Denmark/16/2008(H1N1)	NNT		NST	NHT	NIN	NNT	NSS	NGT		NGS				NTT	NWS
A/Denmark/17/2008(H1N1)	NNT		NST	NHT	NIN	NNT	NSS	NGT		NGS				NTT	NWS
A/Denmark/18/2008(H1N1)	NNT		NST	NHT	NIN	NNT	NSS	NGT		NGS				NTT	NWS
A/Denmark/23/2008(H1N1)	NNT		NST	NHT	NIN	NNT	NSS	NGT		NGS				NTT	NWS
A/Denmark/27/2008(H1N1)	NNT		NST	NHT	NIN	NNT	NSS	NGT		NGS				NTT	NWS
A/Denmark/30/2008(H1N1)	NNT		NST	NHT	NIN	NNT	NSS	NGT		NGS				NTT	NWS
A/Denmark/33/2008(H1N1)	NNT		NST	NHT	NIN	NNT	NSS	NGT		NGS				NTT	NWS
A/Denmark/34/2008(H1N1)	NNT		NST	NHT	NIN	NNT	NSS	NGT		NGS				NTT	NWS
A/Denmark/36/2008(H1N1)	NNT		NST	NHT	NIN	NNT	NSS	NGT		NGS				NTT	NWS
A/Denmark/37/2008(H1N1)	NNT		NST	NHT	NIN	NNT	NSS	NGT		NGS				NTT	NWS
A/Denmark/38/2008(H1N1)	NNT		NST	NHT	NIN	NNT	NSS	NGT		NGS				NTT	NWS
A/Denmark/4/2008(H1N1)	NNT		NST	NHT	NIN	NNT	NSS	NGT		NGS				NTT	NWS
A/Denmark/41/2008(H1N1)	NNT		NST	NHT	NIN	NNT	NSS	NGT		NGS				NTT	NWS
A/Denmark/43/2008(H1N1)	NNT		NST	NHT	NIN	NNT	NSS	NGT		NGS				NTT	NWS
A/Denmark/46/2008(H1N1)	NNT		NST	NHT	NIN	NNT	NSS	NGT		NGS				NTT	NWS
A/Denmark/47/2008(H1N1)	NNT		NST	NHT	NIN	NNT	NSS	NGT		NGS				NTT	NWS
A/Denmark/52/2008(H1N1)	NNT		NST	NHT	NIN	NNT	NSS	NGT		NGS				NTT	NWS
A/District of Columbia/WRAMC-1154047/2008(H1N1)	NNT		NST	NHT	NIN	NNT	NSS	NGT		NGS				NTT	NWS
A/District of Columbia/WRAMC-1154048/2008(H1N1)	NNT		NST	NHT	NIN	NNT	NSS	NGT		NGS				NTT	NWS
A/England/26/2008(H1N1)	NNT		NST	NHT	NIN	NNT	NSS	NGT		NGS				NTT	NWS
A/Esfahan/708/2008(H1N1)	NNT		NST	NHT	NIN	NNT	NSS	NGT		NGS				NTT	NWS
A/Finland/11/2008(H1N1)	NNT		NST	NHT	NIN	NNT	NSS	NGT		NGS				NTT	NWS
A/Florida/02/2008(H1N1)	NNT		NST	NHT	NIN	NNT	NSS	NGT		NGS				NTT	NWS
A/Florida/06/2008(H1N1)	NNT		NST	NHT	NIN	NNT	NSS	NGT		NGS				NTT	NWS
A/Florida/08/2008(H1N1)	NNT		NST	NHT	NIN	NNT	NSS	NGT		NGS				NTT	NWS
A/Florida/09/2008(H1N1)	NNT		NST	NHT	NIN	NNT	NSS	NGT		NGS				NTT	NWS
A/Florida/17/2008(H1N1)	NNT		NST	NHT	NIN	NNT	NSS	NGT		NGS				NTT	NWS
A/Florida/17/2008(H1N1)	NNT		NST	NHT	NIN	NNT	NSS	NGT		NGS				NTT	NWS
A/Florida/18/2008(H1N1)	NNT		NST	NHT	NIN	NNT	NSS	NGT		NGS				NTT	NWS
A/Florida/19/2008(H1N1)	NNT		NST	NHT	NIN	NNT	NSS	NGT		NGS				NTT	NWS
A/Florida/19/2008(H1N1)	NNT		NST	NHT	NIN	NNT	NSS	NGT		NGS				NTT	NWS
A/Florida/21/2008(H1N1)	NNT		NST	NHT	NIN	NNT	NSS	NGT		NGS				NTT	NWS
A/Florida/24/2008(H1N1)	NNT		NST	NHT	NIN	NNT	NSS	NGT		NGS				NTT	NWS
A/Florida/28/2008(H1N1)	NNT		NST	NHT	NIN	NNT	NSS	NGT		NGS				NTT	NWS
A/Florida/UR07-0022/2008(H1N1)	NNT		NST	NHT	NIN	NNT	SSS	NGT		NGS				NTT	NWS
A/Geneva/9296/2008(H1N1))	NNT		NST	NHT	NIN	NNT	NSS	NGT		NGS				NTT	NWS
A/Georgia/05/2008(H1N1)	NNT		NST	NHT	NIN	NNT	NSS	NGT		NGS				NTT	NWS
A/Georgia/08/2008(H1N1)	NNT		NST	NHT	NIN	NNT	NSS	NGT		NGS				NTT	NWS
A/Gunma/07G002/2008(H1N1)	NHT		NST	NHT	NIN	NNT	NSS	NGT		NGS				NTT	NWS
A/Gunma/07G006/2008(H1N1)	NNT		NST	NHT	NIN	NNT	NSS	NGT		NGS				NTT	NWS
A/Gunma/07G011/2008(H1N1)	NHT		NST	NHT	NIN	NNT	NSS	NGT		NGS				NTT	NWS
A/Gunma/07G019/2008(H1N1)	NHT		NST	NHT	NIN	NNT	NSS	NGT		NGS				NTT	NWS
A/Gunma/08G004/2008(H1N1)	NNT		NST	NHT	NIN	NNT	NSS	NGT		NGS				NTT	NWS
A/Gunma/08G005/2008(H1N1))	NNT		NST	NHT	NIN	NNT	NSS	NGT		NGS				NTT	NWS
A/Hawaii/01/2008(H1N1)	NNT		NST	NHT	NIN	NNT	NSS	NGT		NGS				NTT	NWS
A/Hawaii/02/2008(H1N1)	NNT		NST	NHT	NIN	NNT	NSS	NGT		NGS				NTT	NWS
A/Hawaii/05/2008(H1N1)	NHT		NST	NHT	NIN	NNT	NSS	NGT		NGS				NTT	NWS
A/Hawaii/06/2008(H1N1)	NNT		NST	NHT	NIN	NNT	NSS	NGT		NGS				NTT	NWS
A/Hawaii/19/2008(H1N1)	NNT		NST	NHT	NIN	NNT	NSS	NGT		NGS				NTT	NWS
A/Hawaii/19/2008(H1N1)	NNT		NST	NHT	NIN	NNT	NSS	NGT		NGS				NTT	NWS
A/Hawaii/20/2008(H1N1)	NNT		NST	NHT	NIN	NNT	NSS	NGT		NGS				NTT	NWS
A/Hawaii/20/2008(H1N1)	NNT		NST	NHT	NIN	NNT	NSS	NGT		NGS				NTT	NWS
A/Hawaii/20/2008(H1N1)	NNT		NST	NHT	NIN	NNT	NSS	NGT		NGS				NTT	NWS
A/Hawaii/21/2008(H1N1)	NNT		NST	NHT	NIN	NNT	NSS	NGT		NGS				NTT	NWS
A/Hawaii/21/2008(H1N1)	NNT		NST	NHT	NIN	NNT	NSS	NGT		NGS				NTT	NWS
A/Hawaii/38/2008(H1N1)	NNT		NST	NHT	NIN	NNT	NSS	NGT		NGS				NTT	NWS
A/Hawaii/38/2008(H1N1)	NNT		NST	NHT	NIN	NNT	NSS	NGT		NGS				NTT	NWS
A/Hawaii/41/2008(H1N1)	NNT		NST	NHT	NIN	NNT	NSS	NGT		NGS				NTT	NWS
A/Hawaii/42/2008(H1N1)	NNT		NST	NHT	NIN	NNT	NSS	NGT		NGS				NTT	NWS
A/Hawaii/46/2008(H1N1)	NNT		NST	NHT	NIN	NNT	NSS	NGT		NGS				NTT	NWS
A/Hawaii/55/2008(H1N1)	NNT		NST	NHT	NIN	NNT	NSS	NGT		NGS				NTT	NWS
A/Hawaii/58/2008(H1N1)	NNT		NST	NHT	NIN	NNT	NSS	NGT		NGS				NTT	NWS
A/Hawaii/59/2008(H1N1)	NNT		NST	NHT	NIN	NNT	NSS	NGT		NGS				NTT	NWS
A/Hawaii/59/2008(H1N1)	NNT		NST	NHT	NIN	NNT	NSS	NGT		NGS				NTT	NWS
A/Hokkaido/08H003/2008(H1N1)	NNT		NST	NHT	NIN	NNT	NSS	NGT	NRS	NGS				NTT	NWS
A/Hokkaido/08H006/2008(H1N1)	NNT		NST	NHT	NIN	NNT	NSS	NGT	NRS	NGS				NTT	NWS
A/Hokkaido/08H009/2008(H1N1)	NNT		NST	NHT	NIN	NNT	NSS	NGT		NGS				NTT	NWS
A/Hong Kong/17/2008(H1N1)	NNT		NST	NHT	NIN	NNT	NSS	NGT		NGS				NTT	NWS
A/Hong Kong/17/2008(H1N1)	NNT		NST	NHT	NIN	NNT	NSS	NGT		NGS				NTT	NWS
A/Hong Kong/179/2008(H1N1)	NNT		NST	NHT	NIN	NNT	NSS	NGT		NGS				NTT	NWS
A/Hong Kong/349/2008(H1N1)	NNT		NST	NHT	NIN	NNT	NSS	NGT		NGS				NTT	NWS
A/Hong Kong/349/2008(H1N1)	NNT		NST	NHT	NIN	NNT	NSS	NGT		NGS				NTT	NWS
A/Hong Kong/36/2008(H1N1)	NNT		NST	NHT	NIN	NNT	NSS	NGT		NGS				NTT	NWS
A/Hong Kong/36/2008(H1N1)	NHT		NST	NHT	NIN	NNT	NSS	NGT		NGS				NTT	NWS
A/Hungary/13/2008(H1N1)	NNT		NST	NHT	NIN	NNT	NSS	NGT		NGS				NTT	NWS
A/Hyogo/07K036/2008(H1N1)	NNT		NST	NHT	NIN	NNT	NSS	NGT		NGS				NTT	NWS
A/Hyogo/07K084/2008(H1N1)	NNT		NST	NHT	NIN	NNT	NSS	NGT		NGS				NTT	NWS
A/Idaho/01/2008(H1N1)	NNT		NST	NHT	NIN	NNT	NSS	NXT		NGS				NTT	NWS
A/Idaho/02/2008(H1N1)	NNT		NST	NHT	NIN	NNT	NSS	NGT		NGS				NTT	NWS
A/Idaho/09/2008(H1N1)	NNT		NST	NHT	NIN	NNT	NSS	NGT		NGS				NTT	NWS
A/Idaho/23/2008(H1N1)	NNT		NST	NHT	NIN	NNT	NSS	NGT		NGS				NTT	NWS
A/Illinois/06/2008(H1N1)	NNT		NST	NHT	NIN	NNT	NSS	NGT		NGS				NTT	NWS
A/Illinois/15/2008(H1N1)	NNT		NST	NHT	NIN	NNT	NSS	NGT		NGS				NTT	NWS
A/Illinois/16/2008(H1N1)	NNT		NST	NHT	NIN	NNT	NSS	NGT		NGS				NTT	NWS
A/Illinois/17/2008(H1N1)	NNT		NST	NHT	NIN	NNT	NSS	NGT		NGS				NTT	NWS
A/Indiana/01/2008(H1N1)	NNT		NST	NHT	NIN	NNT	NSS	NGT		NGS				NTT	NWS
A/Indiana/04/2008(H1N1)	NNT		NST	NHT	NIN	NNT	NSS	NGT		NGS				NTT	NWS
A/Ireland/v1088/2008(H1N1)	NNT		NST	NHT	NIN	NNT	NSS	NGT		NGS				NTT	NWS
A/Japan/763/2008(H1N1)	NHT		NST	NHT	NIN	NNT	NSS	NGT	NRS	NGS				NTT	NWS
A/Japan/AF07/2008(H1N1)	NNT		NST	NHT	NIN	NNT	NSS	NGT		NGS				NTT	NWS
A/Johannesburg/12/2008(H1N1)	NNT		NST	NHT	NIN	NNT	NSS	NGT		NGS				NTT	NWS
A/Johannesburg/14/2008(H1N1)	NNT		NST	NHT	NIN	NNT	NSS	NGT		NGS				NTT	NWS
A/Johannesburg/21/2008(H1N1)	NNT		NNT	NHT	NIN	NNT	NSS	NGT		NGS				NTT	NWS
A/Johannesburg/279/2008(H1N1)	NNT		NST	NHT	NIN	NNT	NSS	NRT		NGS				NTT	NWS
A/Johannesburg/28/2008(H1N1)	NNT		NNT	NHT	NIN	NNT	NSS	NGT		NGS				NTT	NWS
A/Johannesburg/33/2008(H1N1)	NNT		NST	NHT	NIN	NNT	NSS	NGT		NGS				NTT	NWS
A/Johannesburg/35/2008(H1N1)	NNT		NST	NHT	NIN	NNT	NSS	NGT		NGS				NTT	NWS
A/Johannesburg/37/2008(H1N1)	NNT		NST	NHT	NIN	NNT	NSS	NGT		NGS				NTT	NWS
A/Johannesburg/45/2008(H1N1)	NNT		NST	NHT	NIN	NNT	NSS	NGT		NGS				NTT	NWS
A/Kentucky/UR07-0061/2008(H1N1)	NNT		NST	NHT	NIN	NNT	NSS	NGT		NGS				NTT	NWS
A/Khorasan/512/2008(H1N1)	NNT		NST	NHT	NIN	NNT	NSS	NGT		NGS				NTT	NWS
A/Khorasan/527/2008(H1N1)	NNT		NST	NHT	NIN	NNT	NSS	NGT		NGS				NTT	NWS
A/Khorasan-Jonoobi/511/2008(H1N1)	NNT		NST	NHT	NIN	NNT	NSS	NGT		NGS				NTT	NWS
A/Kiev/245/2008(H1N1)	NNT		NST	NHT	NIN	NNT	NSS	NGT		NGS				NTT	NWS
A/Kiev/313/2008(H1N1)	NNT		NST	NHT	NIN	NNT	NSS	NGT		NGS				NTT	NWS
A/Kyoto/07K008/2008(H1N1)	NHT		NST	NHT	NIN	NNT	NSS	NGT		NGS				NTT	NWS
A/Kyoto/07K018/2008(H1N1)	NHT		NST	NHT	NIN	NNT	NSS	NGT		NGS				NTT	NWS
A/Kyoto/07K088/2008(H1N1)	NHT		NST	NHT	NIN	NNT	NSS	NGT		NGS				NTT	NWS
A/Kyoto/07K112/2008(H1N1)	NNT		NST	NHT	NIN	NNT	NSS	NGT		NGS				NTT	NWS
A/Kyoto/07K145/2008(H1N1)	NNT		NST	NHT	NIN	NNT	NSS	NGT	NRS	NGS				NTT	NWS
A/Kyoto/07K225/2008(H1N1)	NNT		NST	NHT	NIN	NNT	NSS	NGT		NGS				NTT	NWS
A/Kyoto/07K232/2008(H1N1)	NHT		NST	NHT	NIN	NNT	NSS	NGT		NGS				NTT	NWS
A/Kyoto/07K303/2008(H1N1)	NHT		NST	NHT	NIN	NNT	NSS	NGT		NGS				NTT	NWS
A/Kyoto/07K316/2008(H1N1)	NNT		NST	NHT	NIN	NNT	NSS	NGT		NGS				NTT	NWS
A/Kyoto/07K350/2008(H1N1)	NHT		NST	NHT	NIN	NNT	NSS	NGT		NGS				NTT	NWS
A/Kyoto/07K364/2008(H1N1)	NHT		NST	NHT	NIN	NNT	NSS	NGT		NGS				NTT	NWS
A/Kyoto/07K431/2008(H1N1)	NHT		NST	NHT	NIN	NNT	NSS	NGT		NGS				NTT	NWS
A/Kyoto/07K454/2008(H1N1)	NNT		NST	NHT	NIN	NNT	NSS	NGT	NRS	NGS				NTT	NWS
A/Kyoto/07K466/2008(H1N1)	NHT		NST	NHT	NIN	NNT	NSS	NGT		NGS				NTT	NWS
A/Kyoto/07K520/2008(H1N1)	NHT		NST	NHT	NIN	NNT	NSS	NGT		NGS				NTT	NWS
A/Kyoto/08K008/2008(H1N1)	NNT		NST	NHT	NIN	NNT	NSS	NGT		NGS				NAT	NWS
A/Kyoto/08K026/2008(H1N1)	NNT		NST	NHT	NIN	NNT	NSS	NGT		NGS				NTT	NWS
A/Kyoto/08K072/2008(H1N1)	NNT		NST	NHT	NIN	NNT	NSS	NGT		NGS				NTT	NWS
A/Latvia/1-938/2008(H1N1)	NNT		NST	NHT	NIN	NNT	NSS	NGT		NGS				NTT	NWS
A/Leiden/10320/2008(H1N1)	NNT		NST	NHT	NIN	NNT	NSS	NGT		NGS				NTT	NWS
A/Leiden/11693/2008(H1N1)	NNT		NST	NHT	NIN	NNT	NSS	NGT		NGS				NTT	NWS
A/Leiden/12178/2008(H1N1)	NNT		NST	NHT	NIN	NNT	NSS	NGT		NGS				NTT	NWS
A/Leiden/13892/2008(H1N1)	NNT		NST	NHT	NIN	NNT	NSS	NGT		NGS				NTT	NWS
A/Lisbon/15/2008(H1N1)	NNT		NST	NHT	NIN	NNT	NSS	NGT		NGS				NTT	NWS
A/Lisbon/3/2008(H1N1)	NNT		NST	NHT	NIN	NNT	NSS	NGT		NGS				NTT	NWS
A/Louisiana/03/2008(H1N1)	NNT		NST	NHT	NIN	NNT	NSS	NGT		NGS				NTT	NWS
A/Luxembourg/030/2008(H1N1)	NNT		NST	NHT	NIN	NNT	NSS	NGT		NGS				NTT	NWS
A/Luxembourg/056/2008(H1N1)	NNT		NST	NHT	NIN	NNT	NSS	NGT		NGS				NTT	NWS
A/Luxembourg/086/2008(H1N1)	NNT		NST	NHT	NIN	NNT	NSS	NGT		NGS				NTT	NWS
A/Luxembourg/090/2008(H1N1)	NNT		NST	NHT	NIN	NNT	NSS	NGT		NGS				NTT	NWS
A/Luxembourg/110/2008(H1N1)	NHT		NST	NHT	NIN	NNT	NSS	NGT		NGS				NAT	NWS
A/Luxembourg/115/2008(H1N1)	NNT		NST	NHT	NIN	NNT	NSS	NGT		SGS				NTT	NWS
A/Luxembourg/116/2008(H1N1)	NNT		NST	NHT	NIN	NNT	NSS	NGT		NGS				NTT	NWS
A/Luxembourg/164/2008(H1N1)	NNT		NST	NHT	NIN	NNT	NSS	NGT		NGS				NTT	NWS
A/Luxembourg/176/2008(H1N1))	NNT		NST	NHT	NIN	NNT	NSS	NGT		NGS				NTT	NWS
A/Luxembourg/181/2008(H1N1)	NNT		NST	NHT	NIN	NNT	NSS	NGT		NGS				NTT	NWS
A/Luxembourg/182/2008(H1N1)	NNT		NST	NHT	NIN	NNT	NSS	NGT		NGS				NTT	NWS
A/Luxembourg/184/2008(H1N1)	NNT		NST	NHT	NIN	NNT	NSS	NGT		NRS				NTT	NWS
A/Luxembourg/185/2008(H1N1)	NNT		NST	NHT	NIN	NNT	NSS	NGT		NGS				NTT	NWS
A/Luxembourg/187/2008(H1N1)	NNT		NST	NHT	NIN	NNT	NSS	NGT		NGS				NTT	NWS
A/Luxembourg/198/2008(H1N1)	NNT		NST	NHT	NIN	NNT	NSS	NGT		NGS				NTT	NWS
A/Luxembourg/20/08(H1N1)	NNT		NST	NHT	NIN	NNT	NSS	NGT		NGS				NTT	NWS
A/Luxembourg/215/2008(H1N1)	NNT		NST	NHT	NIN	NNT	NSS	NGT		SGS				NTT	NWS
A/Luxembourg/222/2008(H1N1)	NNT		NST	NHT	NIN	NNT	NSS	NGT		NGS				NTT	NWS
A/Luxembourg/234/2008(H1N1)	NNT		NST	NHT	NIN	NNT	NSS	NGT		NGS				NTT	NWS
A/Luxembourg/249/2008(H1N1)	NNT		NST	NHT	NIN	NNT	NSS	NGT		NGS				NTT	NWS
A/Luxembourg/257/2008(H1N1)	NNT		NST	NHT	NIN	NNT	NSS	NGT		NGS				NTT	NWS
A/Luxembourg/261/2008(H1N1)	NNT		NST	NHT	NIN	NNT	NSS	NGT		NGS				NTT	NWS
A/Luxembourg/265/2008(H1N1)	NNT		NST	NHT	NIN	NNT	NSS	NGT		NGS				NTT	NWS
A/Luxembourg/270/2008(H1N1)	NNT		NST	NHT	NIN	NNT	NSS	NGT		NGS				NTT	NWS
A/Luxembourg/288/2008(H1N1)	NNT		NST	NHT	NIN	NNT	NSS	NGT		NGS				NTT	NWS
A/Luxembourg/296/2008(H1N1)	NNT		NST	NHT	NIN	NNT	NSS	NGT		NGS				NTT	NWS
A/Luxembourg/398/2008(H1N1)	NNT		NST	NHT	NIN	NNT	NSS	NGT		NGS				NTT	NWS
A/Luxembourg/433/2008(H1N1)	NNT		NST	NHT	NIN	NNT	NSS	NGT		NGS				NTT	NWS
A/Luxembourg/442/2008(H1N1)	NNT		NST	NHT	NIN	NNT	NSS	NGT		NGS				NTT	NWS
A/Luxembourg/492/2008(H1N1)	NNT		NST	NHT	NIN	NNT	NSS	NGT		NGS				NTT	NWS	307 NQT
A/Luxembourg/525/2008(H1N1)	NNT		NST	NHT	NIN	NNT	NSS	NGT		NGS				NTT	NWS	93 NNS
A/Luxembourg/572/2008(H1N1)	NNT		NST	NHT	NIN	NNT	NSS	NGT		NGS				NTT	NWS
A/Macau/229/2008(H1N1)	NNT		NST	NHT	NIN	NNT	NSS	NGT		NGS				NTT	NWS
A/Managua/1038.01/2008(H1N1)	NNT		NST	NHT	NIN	NNT	NSS	NGT		NGS				NTT	NWS
A/Managua/1225.02/2008(H1N1)	NNT		NST	NHT	NIN	NNT	NSS	NGT		NGS				NTT	NWS
A/Managua/156.01/2008(H1N1)	NNT		NST	NHT	NIN	NNT	NSS	NGT		NGS				NTT	NWS
A/Managua/1985.01/2008(H1N1)	NNT		NST	NHT	NIN	NNT	NSS	NGT		NGS				NTT	NWS
A/Managua/2055.01/2008(H1N1)	NNT		NST	NHT	NIN	NNT	NSS	NGT		NGS				NTT	NWS
A/Managua/2512.01/2008(H1N1)	NNT		NST	NHT	NIN	NNT	NSS	NGT		NGS	NKT			NTT	NWS
A/Managua/2860.01/2008(H1N1)	NNT		NST	NHT	NIN	NNT	NSS	NGT		NGS				NTT	NWS
A/Managua/3027.01/2008(H1N1)	NNT		NST	NHT	NIN	NNT	NSS	NGT		NGS				NTT	NWS
A/Managua/309.01/2008(H1N1)	NNT		NST	NHT	NIN	NNT	NSS	NGT		NGS				NTT	NWS
A/Managua/3153.01/2008(H1N1)	NNT		NST	NHT	NIN	NNT	NSS	NGT		NGS				NTT	NWS
A/Managua/3180.01/2008(H1N1)	NNT		NST	NHT	NIN	NNT	NSS	NGT		NGS				NTT	NWS
A/Managua/3307.01/2008(H1N1)	NNT		NST	NHT	NIN	NNT	NSS	NGT		NGS				NTT	NWS
A/Managua/3418.01/2008(H1N1)	NNT		NST	NHT	NIN	NNT	NSS	NGT		NGS				NTT	NWS
A/Managua/3570.01/2008(H1N1)	NNT		NST	NHT	NIN	NNT	NSS	NGT		NGS				NTT	NWS
A/Managua/3759.02/2008(H1N1)	NNT		NST	NHT	NIN	NNT	NSS	NGT		NGS				NTT	NWS
A/Managua/4017.02/2008(H1N1)	NNT		NST	NHT	NIN	NNT	NSS	NGT		NGS				NTT	NWS
A/Managua/4032.01/2008(H1N1)	NNT		NST	NHT	NIN	NNT	NSS	NGT		NGS				NTT	NWS
A/Managua/4070.01/2008(H1N1)	NNT		NST	NHT	NIN	NNT	NSS	NGT		NGS				NTT	NWS
A/Managua/4086.02/2008(H1N1)	NNT		NST	NHT	NIN	NNT	NSS	NGT		NGS				NTT	NWS
A/Managua/4315.04/2008(H1N1)	NNT		NST	NHT	NIN	NNT	NSS	NGT		NGS				NTT	NWS
A/Managua/4341.01/2008(H1N1)	NNT		NST	NHT	NIN	NNT	NSS	NGT		NGS				NTT	NWS
A/Managua/4359.01/2008(H1N1)	NNT		NST	NHT	NIN	NNT	NSS	NGT		NGS				NTT	NWS
A/Managua/4412.01/2008(H1N1)	NNT		NST	NHT	NIN	NNT	NSS	NGT		NGS				NTT	NWS
A/Managua/4444.01/2008(H1N1)	NNT		NST	NHT	NIN	NNT	NSS	NGT		NGS				NTT	NWS
A/Managua/4924.01/2008(H1N1)	NNT		NST	NHT	NIN	NNT	NSS	NGT		NGS				NTT	NWS
A/Managua/496.01/2008(H1N1)	NNT		NST	NHT	NIN	NNT	NSS	NGT		NGS				NTT	NWS
A/Managua/5007.01/2008(H1N1)	NNT		NST	NHT	NIN	NNT	NSS	NGT		NGS				NTT	NWS
A/Managua/5214.01/2008(H1N1)	NNT		NST	NHT	NIN	NNT	NSS	NGT		NGS				NTT	NWS
A/Managua/5751.01/2008(H1N1)	NNT		NST	NHT	NIN	NNT	NSS	NGT		NGS				NTT	NWS
A/Managua/954.02/2008(H1N1)	NNT		NST	NHT	NIN	NNT	NSS	NGT		NGS				NTT	NWS
A/Maryland/01/2008(H1N1)	NNT		NST	NHT	NIN	NNT	NSS	NGT		NGS				NTT	NWS
A/Maryland/04/2008(H1N1)	NNT		NST	NHT	NIN	NNT	NSS	NGT		NGS				NTT	NWS
A/Maryland/05/2008(H1N1)	NNT		NST	NHT	NIN	NNT	NSS	NGT		NGS				NTT	NWS
A/Maryland/07/2008(H1N1)	NNT		NST	NHT	NIN	NNT	NSS	NGT		NGS				NTT	NWS
A/Massachusetts/01/2008(H1N1)	NHT		NST	NHT	NIN	NNT	NSS	NGT		NGS				NTT	NWS
A/Massachusetts/08/2008(H1N1)	NNT		NST	NHT	NIN	NNT	NSS	NGT		NGS				NTT	NWS
A/Massachusetts/08/2008(H1N1)	NNT		NST	NHT	NIN	NNT	NSS	NGT		NGS				NTT	NWS
A/Massachusetts/09/2008(H1N1)	NNT		NST	NHT	NIN	NNT	NSS	NGT		NGS				NTT	NWS
A/Massachusetts/12/2008(H1N1)	NNT		NST	NHT	NIN	NNT	NSS	NGT		NGS				NTT	NWS
A/Mazandaran/510/2008(H1N1)	NNT		NST	NHT	NIN	NNT	NSS	NGT		NGS				NTT	NWS
A/Memphis/03/2008(H1N1)	NNT		NST	NHT	NIN	NNT	NSS	NGT		NGS				NTT	NWS
A/Memphis/07/2008(H1N1)	NNT		NST	NHT	NIN	NNT	NSS	NGT		NGS				NTT	NWS
A/Michigan/05/2008(H1N1)	NNT		NST	NHT	NIN	NNT	NSS	NGT		NGS				NTT	NWS
A/Michigan/06/2008(H1N1)	NNT		NST	NHT	NIN	NNT	NSS	NGT		NGS				NTT	NWS
A/Michigan/10/2008(H1N1)	NNT		NST	NHT	NIN	NNT	NSS	NGT		NGS				NTT	NWS
A/Minnesota/01/2008(H1N1)	NNT		NST	NHT	NIN	NNT	NSS	NGT		NGS				NTT	NWS
A/Minnesota/24/2008(H1N1)	NHT		NST	NHT	NIN	NNT	NSS	NGT		NGS				NTT	NWS
A/Minnesota/27/2008(H1N1)	NNT		NST	NHT	NIN	NNT	NSS	NGT		NGS				NTT	NWS
A/Minnesota/33/2008(H1N1)	NNT		NST	NHT	NIN	NNT	NSS	NGT		NGS				NTT	NWS
A/Minnesota/34/2008(H1N1)	NNT		NST	NHT	NIN	NNT	NSS	NGT		NGS				NTT	NWS
A/Mississippi/06/2008(H1N1)	NNT		NST	NHT	NIN	NNT	NSS	NGT		NGS				NTT	NWS
A/Mississippi/06/2008(H1N1)	NNT		NST	NHT	NIN	NNT	NSS	NGT		NGS				NTT	NWS
A/Missouri/06/2008(H1N1)	NHT		NST	NHT	NIN	NNT	NSS	NGT		NGS				NTT	NWS
A/Montana/01/2008(H1N1)	NNT		NST	NHT	NIN	NNT	NSS	NGT		NGS				NTT	NWS
A/Montserrat/1448/2008(H1N1)	NNT		NST	NHT	NIN	NNT	NSS	NGT	NRS	NGS				NTT	NWS
A/Montserrat/1448/2008(H1N1)	NNT		NST	NHT	NIN	NNT	NSS	NGT		NGS				NTT	NWS
A/Nagasaki/07N005/2008(H1N1)	NHT		NST	NHT	NIN	NNT	NSS	NGT		NGS				NTT	NWS	398 NWS
A/Nagasaki/07N006/2008(H1N1)	NNT		NST	NHT	NIN	NNT	NSS	NGT		NGS				NTT	NWS
A/Nagasaki/07N010/2008(H1N1)	NHT		NST	NHT	NIN	NNT	NSS	NGT		NGS				NTT	NWS
A/Nagasaki/07N011/2008(H1N1)	NNT		NST	NHT	NIN	NNT	NSS	NGT		NGS				NTT	NWS
A/Nagasaki/07N014/2008(H1N1)	NHT		NST	NHT	NIN	NNT	NSS	NGT		NGS				NTT	NWS
A/Nagasaki/07N016/2008(H1N1)	NNT		NST	NHT	NIN	NNT	NSS	NGT	NRS	NGS				NTT	NWS
A/Nagasaki/07N020/2008 (H1N1)	NNT		NST	NHT	NIN	NNT	NSS	NGT		NGS				NTT	NWS
A/Nagasaki/07N035/2008(H1N1)	NNT		NST	NHT	NIN	NNT	NSS	NGT		NGS				NTT	NWS
A/Nagasaki/08N001/2008(H1N1)	NNT		NST	NHT	NIN	NNT	NSS	NGT		NGS				NTT	NWS
A/Nagasaki/08N004/2008(H1N1)	NNT		NST	NHT	NIN	NNT	NSS	NGT		NGS				NTT	NWS
A/Nagasaki/08N005/2008(H1N1)	NNT		NST	NHT	NIN	NNT	NSS	NGT		NGS				NTT	NWS
A/Naypyitaw/M499/2008(H1N1))	NHT		NST	NHT	NIN	NNT	NSS	NGT		NGS				NTT	NWS
A/Naypyitaw/M721/2008(H1N1)	NHT		NST	NHT	NIN	NNT	NSS	NGT		NGS				NTT	NWS
A/Naypyitaw/M783/2008(H1N1)	NHT		NST	NHT	NIN	NNT	NSS	NGT		NGS				NTT	NWS
A/Nebraska/01/2008(H1N1)	NNT		NST	NHT	NIN	NNT	NSS	NGT		NGS				NTT	NWS
A/Nebraska/07/2008(H1N1))	NNT		NST	NHT	NIN	NNT	NSS	NGT		NGS				NTT	NWS
A/Netherlands/159/2008(H1N1)	NNT		NST	NHT	NIN	NNT	NSS	NGT		NGS				NTT	NWS
A/New Caledonia/6/2008(H1N1)	NNT		NST	NHT	NIN	NNT	NSS	NGT		NGS				NTT	NWS
A/New Jersey/01/2008(H1N1)	NNT		NST	NHT	NIN	NNT	NSS	NGT		NGS				NTT	NWS
A/New Jersey/02/2008(H1N1)	NNT		NST	NHT	NIN	NNT	NSS	NGT		NGS				NTT	NWS
A/New Jersey/03/2008(H1N1)	NNT		NST	NHT	NIN	NNT	NSS	NGT		NGS				NTT	NWS
A/New Jersey/04/2008(H1N1)	NNT		NST	NHT	NIN	NNT	NSS	NGT		NGS				NTT	NWS
A/New Jersey/05/2008(H1N1)	NNT		NST	NHT	NIN	NNT	NSS	NGT		NGS				NTT	NWS
A/New Jersey/06/2008(H1N1)	NNT		NST	NHT	NIN	NNT	NSS	NGT		NGS				NTT	NWS
A/New Jersey/06/2008(H1N1)	NNT		NST	NHT	NIN	NNT	NSS	NGT		NGS				NTT	NWS
A/New Jersey/08/2008(H1N1)	NNT		NST	NHT	NIN	NNT	NSS	NGT		NGS				NTT	SWS
A/New Jersey/09/2008(H1N1)	NNT		NST	NHT	NIN	NNT	NSS	NGT		NGS				NTT	NWS
A/New Jersey/10/2008(H1N1)	NNT		NST	NHT	NIN	NNT	NSS	NGT		NGS				NTT	NWS
A/New Jersey/13/2008(H1N1)	NNT		NST	NHT	NIN	NNT	NSS	NGT		NGS				NTT	NWS
A/New Jersey/16/2008(H1N1)	NNT		NST	NHT	NIN	NNT	NSS	NGT		NGS				NTT	NWS
A/New Jersey/20/2008(H1N1)	NNT		NST	NHT	NIN	NNT	NSS	NGT		NGS				NTT	NWS
A/New Jersey/23/2008(H1N1)	NNT		NST	NHT	NIN	NNT	NSS	NGT		NGS				NTT	NWS
A/New Jersey/30/2008(H1N1)	NKT		NST	NHT	NIN	NNT	NSS	NGT		NGS				NTT	NWS
A/New Jersey/32/2008(H1N1)	NNT		NST	NHT	NIN	NNT	NSS	NGT		NGS				NTT	NWS
A/New Jersey/32/2008(H1N1)	NNT		NST	NHT	NIN	NNT	NSS	NGT		NGS				NTT	NWS
A/New Jersey/AF09/2008(H1N1)	NNT		NST	NHT	NIN	NNT	NSS	NGT		NGS				NTT	NWS
A/New Mexico/01/2008(H1N1)	NNT		NST	NHT	NIN	NNT	NSS	NGT		NGS				NTT	NWS
A/New York/01/2008(H1N1)	NNT		NST	NHT	NIN	NNT	NSS	NGT		NGS				NTT	NWS
A/New York/03/2008(H1N1)	NNT		NST	NHT	NIN	NNT	NSS	NGT		NGS				NTT	NWS
A/New York/05/2008(H1N1)	NNT		NST	NHT	NIN	NNT	NSS	NGT		NGS				NTT	NWS
A/Niigata/07F006/2008(H1N1)	NNT		NST	NHT	NIN	NNT	NSS	NGT		NGS				NTT	NWS
A/Niigata/07F042/2008(H1N1)	NHT		NST	NHT	NIN	NNT	NSS	NGT		NGS				NTT	NWS
A/Niigata/07F071/2008(H1N1)	NNT		NST	NHT	NIN	NNT	NSS	NGT		NGS				NTT	NWS
A/Niigata/07F081/2008(H1N1)	NHT		NST	NHT	NIN	NNT	NSS	NGT		NGS				NTT	NWS
A/Niigata/07F102/2008(H1N1)	NNT		NST	NHT	NIN	NNT	NSS	NGT		NGS				NTT	NWS
A/Niigata/07F125/2008(H1N1)	NHT		NST	NHT	NIN	NNT	NSS	NGT		NGS				NTT	NWS
A/Niigata/07F144/2008(H1N1))	NNT		NST	NHT	NIN	NNT	NSS	NGT	NRS	NGS				NTT	NWS
A/Niigata/07F168/2008(H1N1)	NNT		NST	NHT	NIN	NNT	NSS	NGT		NGS				NTT	NWS
A/Niigata/07F191/2008(H1N1)	NHT		NST	NHT	NIN	NNT	NSS	NGT		NGS				NTT	NWS
A/Niigata/07F203/2008(H1N1)	NHT		NST	NHT	NIN	NNT	NSS	NGT		NGS				NTT	NWS
A/North Carolina/02/2008(H1N1)	NNT		NST	NHT	NIN	NNT	NSS	NGT		NGS				NTT	NWS
A/North Carolina/04/2008(H1N1)	NNT		NST	NHT	NIN	NNT	NSS	NGT		NGS				NTT	NWS
A/North Carolina/05/2008(H1N1)	NNT		NST	NHT	NIN	NNT	NSS	NGT		NGS				NTT	NWS
A/North Carolina/06/2008(H1N1)	NNT		NST	NHT	NIN	NNT	NSS	NGT		NGS				NTT	NWS
A/North Carolina/06/2008(H1N1)	NNT		NST	NHT	NIN	NNT	NSS	NGT		NGS				NTT	NWS
A/North Carolina/07/2008(H1N1)	NNT		NST	NHT	NIN	NNT	NSS	NGT		NGS				NTT	NWS
A/North Dakota/01/2008(H1N1))	NNT		NST	NHT	NIN	NNT	NSS	NGT		NGS				NTT	NWS
A/Ohio/02/2008(H1N1)	NNT		NST	NHT	NIN	NNT	NSS	NGT		NGS				NTT	NWS
A/Oklahoma/02/2008(H1N1)	NNT		NST	NHT	NIN	NNT	NSS	NGT		NGS				NTT	NWS
A/Oklahoma/03/2008(H1N1)	NNT		NST	NHT	NIN	NNT	NSS	NGT		NGS				NTT	NWS
A/Oklahoma/1108/2008(H1N1)	NNT		NST	NHT	NIN	NNT	NSS	NGT		NGS				NTT	NWS
A/Oklahoma/447/2008(H1N1)	NHT		NST	NHT	NIN	NNT	NSS	NGT		NGS				NTT	NWS
A/Ostrava/79/2008(H1N1)	NNT		NST	NHT	NIN	NNT	NSS	NGT		NGS				NTT	NWS
A/Panama/1310/2008(H1N1)	NNT		NST	NHT	NIN	NNT	NSS	NGT		NGS				NTT	NWS
A/Panama/1310/2008(H1N1)	NNT		NST	NHT	NIN	NNT	NSS	NGT		NGS				NTT	NWS
A/Paris/1149/2008(H1N1)	NNT		NST	NHT	NIN	NNT	NSS	NGT		NGS				NTT	NWS
A/Paris/1157/2008(H1N1)	NNT		NST	NHT	NIN	NNT	NSS	NGT		NGS				NTT	NWS
A/Paris/1170/2008(H1N1)	NNT		NST	NHT	NIN	NNT	NSS	NGT		NGS				NTT	NWS
A/Paris/1208/2008(H1N1)	NNT		NST	NHT	NIN	NNT	NSS	NGT		NGS				NTT	NWS
A/Paris/963/2008(H1N1)	NNT		NST	NHT	NIN	NNT	NSS	NGT		NGS				NTT	NWS
A/Parma/34/2008(H1N1)	NNT		NST	NHT	NIN	NNT	NSS	NGT		NGS				NTT	NWS
A/Pennsylvania/01/2008(H1N1)	NNT		NST	NHT	NIN	NNT	NSS	NGT		NGS				NTT	SWS
A/Pennsylvania/02/2008(H1N1)	NNT		NST	NHT	NIN	NNT	NSS	NGT		NGS				NTT	NWS
A/Pennsylvania/05/2008(H1N1)	NNT		NST	NHT	NIN	NNT	NSS	NGT		NGS				NTT	NWS
A/Pennsylvania/08/2008(H1N1)	NNT		NST	NHT	NIN	NNT	NSS	NGT		NGS				NTT	NWS
A/Pennsylvania/08/2008(H1N1)	NNT		NST	NHT	NIN	NNT	NSS	NGT		NGS				NTT	NWS
A/Pennsylvania/08/2008(H1N1)	NNT		NST	NHT	NIN	NNT	NSS	NGT		NGS				NTT	NWS
A/Pennsylvania/08/2008(H1N1)	NNT		NST	NHT	NIN	NNT	NSS	NGT		NGS				NTT	NWS
A/Pennsylvania/09/2008(H1N1)	NNT		NST	NHT	NIN	NNT	NSS	NGT		NGS				NTT	NWS
A/Pennsylvania/09/2008(H1N1)	NNT		NST	NHT	NIN	NNT	NSS	NGT		NGS				NTT	NWS
A/Pennsylvania/12/2008(H1N1)	NNT		NST	NHT	NIN	NNT	NSS	NGT		NGS				NTT	NWS
A/Pennsylvania/14/2008(H1N1)	NNT		NST	NHT	NIN	NNT	NSS	NGT		NGS				NTT	NWS	297 NGS
A/Pennsylvania/14/2008(H1N1)	NNT		NST	NHT	NIN	NNT	NSS	NGT		NGS				NTT	NWS
A/Pennsylvania/15/2008(H1N1)	NNT		NST	NHT	NIN	NNT	NSS	NGT		NGS				NTT	NWS
A/Pennsylvania/15/2008(H1N1)	NNT		NST	NHT	NIN	NNT	NSS	NGT		NGS				NTT	NWS
A/Perth/33/2008(H1N1)	NNT		NST	NHT	NIN	NNT	NSS	NGT		NGS				NTT	NWS
A/Perth/46/2008(H1N1)	NNT		NST	NHT	NIN	NNT	NSS	NGA		NGS				NTT	NWS
A/Philippines/1159/2008(H1N1)	NNT		NST	NHT	NIN	NNT	NSS	NGT		NGS				NTT	NWS
A/Slovenia/123/2008(H1N1)	NNT		NST	NHT	NIN	NNT	NSS	NGT		NGS				NTT	NWS
A/Slovenia/131/2008(H1N1)	NNT		NST	NHT	NIN	NNT	NSS	NGT		NGS				NTT	NWS
A/South Australia/1/2008(H1N1)	NNT		NST	NHT	NIN	NNT	NSS	NGT		NGS				NTT	NWS
A/South Carolina/01/2008(H1N1)	NNT		NST	NHT	NIN	NNT	NSS	NGT		NGS				NTT	NWS
A/South Carolina/06/2008(H1N1)	NNT		NST	NHT	NIN	NNT	NSS	NGT		NGS				NTT	NWS
A/South Carolina/06/2008(H1N1)	NNT		NST	NHT	NIN	NNT	NSS	NGT		NGS				NTT	NWS
A/South Dakota/02/2008(H1N1)	NNT		NST	NHT	NIN	NNT	NSS	NGT		NGS				NTT	NWS
A/South Korea/AF10/2008(H1N1)	NHT		NST	NHT	NIN	NNT	NSS	NGT		NGS				NTT	NWS
A/Stockholm/6/2008(H1N1)	NNT		NST	NHT	NIN	NNT	NSS	NGT		NGS				NTT	NWS
A/Sydney/7/2008(H1N1)	NNT		NST	NHT	NIN	NNT	NSS	NGT		NGS				NTT	NWS
A/Taiwan/401/2008(H1N1)	NNT		NST	NHT	NIN	NNT	NSS	NGT		NGS				NTT	NWS
A/Taiwan/70013/2008(H1N1)	NNT		NST	NHT	NIN	NNT	NSS	NGT		NGS				NTT	NWS
A/Taiwan/70132/2008(H1N1)	NNT		NST	NHT	NIN	NNT	NSS	NGT		NGS				NTT	NWS
A/Taiwan/70167/2008(H1N1)	NNT		NST	NHT	NIN	NNT	NSS	NGT		NGS				NTT	NWS
A/Tehran/523/2008(H1N1)	NNT		NST	NHT	NIN	NNT	NSS	NGT		NGS				NTT	NWS
A/Tennessee/03/2008(H1N1)	NNT		NST	NHT	NIN	NNT	NSS	NGT		NGS				NTT	NWS
A/Tennessee/11/2008(H1N1)	NNT		NST	NHT	NIN	NNT	NSS	NGT		NGS				NTT	NWS
A/Texas/08/2008(H1N1)	NNT		NST	NHT	NIN	NNT	NSS	NGT		NGS				NTT	NWS
A/Texas/09/2008(H1N1)	NNT		NST	NHT	NIN	NNT	NSS	NGT		NGS				NTT	NWS
A/Texas/10/2008(H1N1)	NNT		NST	NHT	NIN	NNT	NSS	NGT		NGS				NTT	NWS
A/Texas/11/2008(H1N1)	NNT		NST	NHT	NIN	NNT	NSS	NGT		NGS				NTT	NWS
A/Texas/15/2008(H1N1)	NNT		NST	NHT	NIN	NNT	NSS	NGT		NGS				NTT	NWS
A/Texas/16/2008(H1N1)	NNT		NST	NHT	NIN	NNT	NSS	NGT		NGS				NTT	NWS
A/Texas/17/2008(H1N1)	NNT		NST	NHT	NIN	NNT	NSS	NGT		NGS				NTT	NWS
A/Texas/18/2008(H1N1)	NNT		NST	NHT	NIN	NNT	NSS	NGT		NGS				NTT	NWS
A/Texas/23/2008(H1N1)	NNT		NST	NHT	NIN	NNT	NSS	NGT		NGS				NTT	NWS
A/Texas/23/2008(H1N1)	NNT		NST	NHT	NIN	NNT	NSS	NGT		NGS				NTT	NWS
A/Texas/27/2008(H1N1)	NNT		NST	NHT	NIN	NNT	NSS	NGT		NGS				NTT	NWS
A/Texas/29/2008(H1N1)	NNT		NST	NHT	NIN	NNT	NSS	NGT		NGS				NTT	NWS
A/Texas/32/2008(H1N1)	NNT		NST	NHT	NIN	NNT	NSS	NGT		NGS				NTT	NWS
A/Texas/35/2008(H1N1)	NNT		NST	NHT	NIN	NNT	NSS	NGT		NGS				NTT	NWS
A/Texas/36/2008(H1N1	NNT		NST	NHT	NIN	NNT	NSS	NGT		NGS				NTT	NWS
A/Thailand/1035/2008(H1N1)	NNT		NST	NNT	NIN	NNT	NSS	NGT		NGS				NTT	NWS
A/Thailand/309/2008(H1N1)	NNT		NST	NHT	NIN	NNT	NSS	NGT		NGS				NTT	NWS
A/Thailand/332/2008(H1N1))	NNT		NST	NHT	NIN	NNT	NSS	NGT		NGS				NTT	NWS
A/Thailand/469/2008(H1N1)	NNT		NST	NHT	NIN	NNT	NSS	NGT		NGS				NTT	NWS
A/Thailand/496/2008(H1N1)	NNT		NST	NHT	NIN	NNT	NSS	NGT		NGS				NTT	NWS
A/Thailand/530/2008(H1N1)	NNT		NST	NHT	NIN	NNT	NSS	NGT		NGS				NTT	NWS
A/Thailand/56/2008(H1N1)	NNT		NST	NHT	NIN	NNT	NSS	NGT		NGS				NTT	NWS
A/Thailand/669/2008(H1N1)	NNT		NST	NHT	NIN	NNT	NSS	NGT		NGS				NTT	NWS
A/Thailand/778/2008(H1N1)	NNT		NST	NHT	NIN	NNT	NSS	NGT		NGS				NTT	NWS
A/Thailand/829/2008(H1N1)	NNT		NST	NHT	NIN	NNT	NSS	NGT		NGS				NTT	NWS
A/Thailand/839/2008(H1N1)	NNT		NST	NHT	NIN	NNT	NSS	NGT		NGS				NTT	NWS
A/Tottori/08T001/2008(H1N1)	NNT		NST	NHT	NIN	NNT	NSS	NGT		NGS	NKT			NTT	NWS
A/Tottori/08T010/2008(H1N1)	NNT		NST	NHT	NIN	NNT	NSS	NGT		NGS				NTT	NWS
A/Trieste/16/2008(H1N1)	NNT		NST	NHT	NIN	NNT	NSS	NGT		NGS				NTT	NWS
A/Uruguay/03/2008(H1N1)	NNT		NST	NHT	NIN	NNT	NSS	NGT		NGS				NTT	NWS
A/Uruguay/03/2008(H1N1)	NNT		NST	NHT	NIN	NNT	NSS	NGT		NGS				NTT	NWS
A/Vermont/01/2008(H1N1)	NNT		NST	NHT	NIN	NNT	NSS	NGT		NGS				NTT	NWS
A/Vermont/03/2008(H1N1)	NNT		NST	NHT	NIN	NNT	NSS	NXT		NGS				NTT	NWS
A/Victoria/501/2008(H1N1)	NNT		NST	NHT	NIN	NNT	NSS	NGT		NGS				NTT	NWS
A/Virginia/03/2008(H1N1)	NNT		NST	NHT	NIN	NNT	NSS	NGT		NGS				NTT	NWS
A/Virginia/07/2008(H1N1)	NNT		NST	NHT	NIN	NNT	NSS	NGT		NGS				NTT	NWS
A/Vladivostok/08R03/2008(H1N1)	NNT		NST	NHT	NIN	NNT	NSS	NGT		NGS				NTT	NWS
A/Vladivostok/08R93/2008(H1N1)	NNT		NST	NHT	NIN	NNT	NSS	NGT		NGS				NTT	NWS
A/Washington/01/2008(H1N1)	NNT		NST	NHT	NIN	NNT	NSS	NGT		NGS				NTT	NWS
A/Washington/05/2008(H1N1)	NNT		NST	NHT	NIN	NNT	NSS	NGT		NGS				NTT	NWS
A/Washington/06/2008(H1N1)	NNT		NST	NHT	NIN	NNT	NSS	NGT		NGS	NKT			NTT	NWS
A/Washington/08/2008(H1N1)	NNT		NST	NHT	NIN	NNT	NSS	NGT		NGS				NTT	NWS
A/Washington/10/2008(H1N1)	NHT		NST	NHT	NIN	NNT	NSS	NGT		NGS				NTT	NWS
A/Washington/12/2008(H1N1)	NNT		NST	NHT	NIN	NNT	NSS	NGT		NGS				NTT	NWS
A/Wisconsin/01/2008(H1N1)	NNT		NST	NHT	NIN	NNT	NSS	NGT		NGS				NTT	NWS
A/Wisconsin/12/2008(H1N1)	NNT		NST	NHT	NIN	NNT	NSS	NGT		NGS				NTT	NWS
A/Wisconsin/16/2008(H1N1)	NNT		NST	NHT	NIN	NNT	NSS	NGT		NGS				NTT	NWS
A/Wisconsin/17/2008(H1N1)	NNT		NST	NHT	NIN	NNT	NSS	NGT		NGS				NTT	NWS
A/Wisconsin/20/2008(H1N1)	NNT		NST	NHT	NIN	NNT	NSS	NGT		NGS				NTT	NWS
A/Wyoming/10/2008(H1N1)	NNT		NST	NHT	NIN	NNT	NSS	NGT		NGS				NTT	NWS
A/Yamagata/1/2008(H1N1)	NNT		NST	NHT	NIN	NNT	NSS	NGT		NGS				NTT	NWS
A/Yamagata/12/2008(H1N1)	NNT		NST	NHT	NIN	NNT	NSS	NGT		NGS				NTT	NWS
A/Yamagata/120/2008(H1N1)	NNT		NST	NHT	NIN	NNT	NSS	NGT		NGS				NTT	NWS
A/Yamagata/125/2008(H1N1)	NNT		NST	NHT	NIN	NNT	NSS	NGT		NGS				NTT	NWS
A/Yamagata/126/2008(H1N1)	NNT		NST	NHT	NIN	NNT	NSS	NGT		NGS				NTT	NWS
A/Yamagata/128/2008(H1N1)	NNT		NST	NHT	NIN	NNT	NSS	NGT		NGS				NTT	NWS
A/Yamagata/13/2008(H1N1)	NNT		NST	NHT	NIN	NNT	NSS	NGT		NGS				NTT	NWS
A/Yamagata/133/2008(H1N1)	NNT		NST	NHT	NIN	NNT	NSS	NGT		NGS				NTT	NWS
A/Yamagata/137/2008(H1N1)	NNT		NST	NHT	NIN	NNT	NSS	NGT		NGS				NTT	NWS
A/Yamagata/39/2008(H1N1)	NNT		NST	NHT	NIN	NNT	NSS	NGT		NGS				NTT	NWS
A/Yamagata/50/2008(H1N1)	NNT		NST	NHT	NIN	NNT	NSS	NGT		NGS				NTT	NWS
A/Yamagata/63/2008(H1N1)	NHT		NST	NHT	NIN	NNT	NSS	NGT		NGS				NTT	NWS
A/Yamagata/66/2008(H1N1)	NNT		NST	NHT	NIN	NNT	NSS	NGT		NGS				NTT	NWS
A/Yamagata/67/2008(H1N1)	NNT		NST	NHT	NIN	NNT	NSS	NGT		NGS				NTT	NWS
A/Yamagata/68/2008(H1N1)	NNT		NST	NHT	NIN	NNT	NSS	NGT		NGS				NTT	NWS
A/Yamagata/69/2008(H1N1)	NHT		NST	NHT	NIN	NNT	NSS	NGT		NGS				NTT	NWS
A/Yamagata/71/2008(H1N1)	NHT		NST	NHT	NIN	NNT	NSS	NGT		NGS				NTT	NWS
A/Yamagata/74/2008(H1N1)	NNT		NST	NHT	NIN	NNT	NSS	NGT		NGS				NTT	NWS
A/Yamagata/81/2008(H1N1)	NHT		NST	NHT	NIN	NNT	NSS	NGT		NGS				NTT	NWS
A/Yangon/M195/2008(H1N1)	NNT		NST	NHT	NIN	NNT	NSS	NGT		NGS				NTT	NWS
A/Yangon/M285/2008(H1N1)	NHT		NST	NHT	NIN	NNT	NSS	NGT		NGS				NTT	NWS
A/Yokohama/22/2008(H1N1)	NNT		NST	NHT	NIN	NNT	NSS	NGT		NGS				NTT	NWS
A/Yokohama/30/2008(H1N1)	NNT		NST	NHT	NIN	NNT	NSS	NRT		NGS				NTT	NWS
A/Yokohama/31/2008(H1N1)	NNT		NST	NHT	NIN	NNT	NSS	NGT		NGS				NTT	NWS
A/Yokohama/34/2008(H1N1)	NNT		NST	NHT	NIN	NNT	NSS	NGT		NGS				NTT	NWS
A/Yokohama/35/2008(H1N1)	NNT		NST	NHT	NIN	NNT	NSS	NGT		NGS				NTT	NWS
A/Yokohama/77/2008(H1N1)	NNT		NST	NHT	NIN	NNT	NSS	NGT		NGS				NTT	NWS
A/Yokohama/78/2008(H1N1)	NNT		NST	NHT	NIN	NNT	NSS	NGT		NGS				NTT	NWS
A/Yokohama/78/2008(H1N1)	NNT		NST	NHT	NIN	NNT	NSS	NGT		NGS				NTT	NWS
A/Yokohama/79/2008(H1N1)	NNT		NST	NHT	NIN	NNT	NSS	NGT		NGS				NTT	NWS
A/Zagreb/1982/2008(H1N1)	NNT		NST	NHT	NIN	NNT	NSS	NGT		NGS				NTT	NWS
A/Indiana/03/2009(H1N1)	NNT		NST	NHT	NIN	NNT	NSS	NGT		NGS				NTT	NWS
A/Vladivostok/08R55/2009(H1N1)	NNT		NST	NHT	NIN	NNT	NSS	NGT		NGS				NAT	NWS
A/Alaska/01/2009(H1N1)	NNT		NST	NHT	NIN	NNT	NSS	NGT		NGS				NTT	NWS
A/Alaska/02/2009(H1N1)	NNT		NST	NHT	NIN	NNT	NSS	NGT		NGS				NTT	NWS
A/Alaska/03/2009(H1N1)	NNT		NST	NHT	NIN	NNT	NSS	NGT		NGS				NTT	NWS
A/Arizona/10/2009(H1N1)	NNT		NST	NHT	NIN	NNT	NSS	NGT		NGS				NTT	NWS
A/Arizona/10/2009(H1N1)	NNT		NST	NHT	NIN	NNT	NSS	NGT		NGS				NTT	NWS
A/Arkansas/01/2009(H1N1)	NNT		NST	NHT	NIN	NNT	NSS	NGT		NGS	NKT			NTT	NWS
A/Arkansas/02/2009(H1N1)	NNT		NST	NHT	NIN	NNT	NSS	NGT		NGS				NTT	NWS
A/California/01/2009(H1N1)	NNT		NST	NHT	NIN	NNT	NSS	NGT		NGS				NTT	NWS
A/California/02/2009(H1N1)	NNT		NST	NHT	NIN	NNT	NSS	NGT		NGS				NTT	NWS
A/California/03/2009(H1N1)	NNT		NST	NHT	NIN	NNT	NSS	NGT		NGS				NTT	NWS
A/California/26/2009(H1N1)	NNT		NST	NHT	NIN	NNT	NSS	NGT		NGS				NTT	NWS
A/California/26/2009(H1N1)	NNT		NST	NHT	NIN	NNT	NSS	NGT		NGS				NTT	NWS
A/Colorado/02/2009(H1N1)	NNT		NST	NHT	NIN	NNT	NSS	NGT		NGS				NTT	NWS
A/Colorado/07/2009(H1N1)	NNT		NST	NHT	NIN	NNT	NSS	NGT		NGS				NTT	NWS
A/Colorado/08/2009(H1N1)	NNT		NST	NHT	NIN	NNT	NSS	NGT		NGS				NTT	NWS
A/Delaware/01/2009(H1N1)	NHT		NST	NHT	NIN	NNT	NSS	NGT		NGS				NTT	NWS
A/Florida/02/2009(H1N1)	NNT		NST	NHT	NIN	NNT	NSS	NGT		NGS				NTT	NWS
A/Florida/03/2009(H1N1)	NNT		NST	NHT	NIN	NNT	NSS	NGT		NGS				NTT	NWS
A/Florida/07/2009(H1N1)	NNT		NST	NHT	NIN	NNT	NSS	NGT		NGS				NTT	NWS
A/Gunma/08G006/2009(H1N1)	NNT		NST	NHT	NIN	NNT	NSS	NGT		NGS				NTT	NWS
A/Gunma/08G011/2009(H1N1)	NNT		NST	NHT	NIN	NNT	NSS	NGT	NRS	NGS				NTT	NWS
A/Gunma/08G014/2009(H1N1)	NNT		NST	NHT	NIN	NNT	NSS	NGT		NGS				NTT	NWS
A/Hawaii/01/2009(H1N1)	NNT		NST	NHT	NIN	NNT	NSS	NGT		NGS				NTT	NWS
A/Hawaii/03/2009(H1N1)	NNT		NST	NHT	NIN	NNT	NSS	NGT		NGS				NTT	NWS
A/Hawaii/03/2009(H1N1)	NNT		NST	NHT	NIN	NNT	NSS	NGT		NGS				NTT	NWS
A/Hawaii/04/2009(H1N1)	NNT		NST	NHT	NIN	NNT	NSS	NGT		NGS				NTT	NWS
A/Hawaii/04/2009(H1N1)	NNT		NST	NHT	NIN	NNT	NSS	NGT		NGS				NTT	NWS
A/Hawaii/13/2009(H1N1)	NNT		NST	NHT	NIN	NNT	NSS	NGT		NGS				NTT	NWS
A/Hawaii/17/2009(H1N1)	NNT		NST	NHT	NIN	NNT	NSS	NGT		NGS				NTT	NWS
A/Hokkaido/08H015/2009(H1N1)	NNT		NST	NHT	NIN	NNT	NSS	NGT		NGS				NTT	NWS
A/Hokkaido/08H017/2009(H1N1)	NNT		NST	NHT	NIN	NNT	NSS	NGT		NGS				NTT	NWS
A/Hokkaido/08H024/2009(H1N1)	NNT		NST	NHT	NIN	NNT	NSS	NGT		NGS				NTT	NWS
A/Hokkaido/08H026/2009(H1N1)	NNT		NST	NHT	NIN	NNT	NSS	NGT		NGS				NTT	NWS
A/Hokkaido/08H033/2009(H1N1)	NNT		NST	NHT	NIN	NNT	NSS	NGT	NRS	DGS				NTT	NWS
A/Hong Kong/84/2009(H1N1)	NHT		NST	NHT	NIN	NNT	NSS	NGT		NGS				NTT	NWS
A/Hyogo/08K416/2009(H1N1)	NNT		NST	NHT	NIN	NNT	NSS	NGT		NGS				NTT	NWS
A/Hyogo/08K498/2009(H1N1)	NNT		NST	NHT	NIN	NNT	NSS	NGT		NGS				NTT	NWS
A/Hyogo/08K500/2009(H1N1)	NNT		NST	NHT	NIN	NNT	NSS	NGT		NGS				NTT	NWS
A/Illinois/06/2009(H1N1)	NNT		NST	NHT	NIN	NNT	NSS	NGT		NRS				NTT	NWS
A/Indiana/01/2009(H1N1)	NNT		NST	NHT	NIN	NNT	NSS	NGT		NGS				NTT	NWS
A/Indiana/04/2009(H1N1)	NNT		NST	NHT	NIN	NNT	NSS	NGT		NGS				NTT	NWS
A/Indiana/05/2009(H1N1)	NNT		NST	NHT	NIN	NNT	NSS	NGT		NGS				NTT	NWS
A/Indiana/07/2009(H1N1)	NNT		NST	NHT	NIN	NNT	NSS	NGT		NGS				NTT	NWS
A/Indiana/11/2009(H1N1)	NNT		NST	NHT	NIN	NNT	NSS	NGT		NGS				NTT	NWS
A/Iowa/01/2009(H1N1)	NNT		NST	NHT	NIN	NNT	NSS	NGT		NGS				NTT	NWS
A/Iowa/01/2009(H1N1)	NNT		NST	NHT	NIN	NNT	NSS	NGT		NGS				NTT	NWS
A/Kansas/01/2009(H1N1)	NNT		NST	NHT	NIN	NNT	NSS	NGT		NGS				NTT	NWS
A/Kentucky/01/2009(H1N1)	NNT		NST	NHT	NIN	NNT	NSS	NGT		NGS				NTT	NWS
A/Kentucky/03/2009(H1N1)	NNT		NST	NHT	NIN	NNT	NSS	NGT		NGS				NTT	NWS
A/Kentucky/08/2009(H1N1)	NNT		NST	NHT	NIN	NNT	NSS	NRT		NGS				NTT	NWS
A/Kentucky/08/2009(H1N1)	NNT		NST	NHT	NIN	NNT	NSS	NRT		NGS				NTT	NWS
A/Kyoto/08K056/2009(H1N1)	NNT		NST	NHT	NIN	NNT	NSS	NGT		NGS				NTT	NWS
A/Kyoto/08K098/2009(H1N1)	NNT		NST	NHT	NIN	NNT	NSS	NGT	NRS	NGS				NTT	NWS
A/Kyoto/08K250/2009(H1N1)	NNT		NST	NHT	NIN	NNT	NSS	NGT		NGS				NTT	NWS
A/Kyoto/08K273/2009(H1N1)	NNT		NST	NHT	NIN	NNT	NSS	NGT		NGS				NTT	NWS
A/Kyoto/08K281/2009(H1N1)	NNT		NST	NHT	NIN	NNT	NSS	NGT		NGS				NTT	NWS
A/Kyoto/08K410/2009(H1N1)	NNT		NST	NHT	NIN	NNT	NSS	NGT		NGS				NTT	NWS
A/Maryland/01/2009(H1N1)	NNT		NST	NHT	NIN	NNT	NSS	NGT		NGS				NTT	NWS
A/Maryland/03/2009(H1N1)	NNT		NST	NHT	NIN	NNT	NSS	NGT		NGS				NTT	NWS
A/Maryland/04/2009(H1N1)	NNT		NST	NHT	NIN	NNT	NSS	NGT		NGS				NTT	NWS
A/Massachusetts/04/2009(H1N1)	NNT		NST	NHT	NIN	NNT	NSS	NGT		NGS				NTT	NWS
A/Massachusetts/05/2009(H1N1)	NNT		NST	NHT	NIN	NNT	NSS	NGT		NGS				NAT	NWS
A/Michigan/07/2009(H1N1)	NNT		NST	NHT	NIN	NNT	NSS	NGT		NGS	NKT			NTT	NWS
A/Minnesota/01/2009(H1N1)	NNT		NST	NHT	NIN	NNT	NSS	NGT		NGS				NTT	NWS
A/Minnesota/01/2009(H1N1)	NNT		NST	NHT	NIN	NNT	NSS	NGT		NGS				NTT	NWS
A/Minnesota/04/2009(H1N1)	NNT		NST	NHT	NIN	NNT	NSS	NGT		NGS				NTT	NWS
A/Montana/01/2009(H1N1)	NNT		NST	NHT	NIN	NNT	NSS	NGT		NGS				NTT	NWS
A/Montana/02/2009(H1N1)	NNT		NST	NHT	NIN	NNT	NSS	NGT		NGS				NTT	NWS
A/Montana/03/2009(H1N1)	NNT		NST	NHT	NIN	NNT	NSS	NGT		NGS				NTT	NWS
A/Nagasaki/08N006/2009(H1N1)	NNT		NST	NHT	NIN	NNT	NSS	NGT	NRS	NGS				NTT	NWS
A/Nagasaki/08N011/2009(H1N1)	NNT		NST	NHT	NIN	NNT	NSS	NGT		NGS				NTT	NWS
A/Nagasaki/08N024/2009(H1N1)	NNT		NST	NHT	NIN	NNT	NSS	NGT		NGS				NTT	NWS
A/Nagasaki/08N026/2009(H1N1)	NNT		NST	NHT	NIN	NNT	NSS	NGT		NGS				NTT	NWS
A/Nagasaki/08N027/2009(H1N1)	NNT		NST	NHT	NIN	NNT	NSS	NGT		NGS				NTT	NWS
A/Nagasaki/08N029/2009(H1N1)	NNT		NST	NHT	NIN	NNT	NSS	NGT		NGS				NTT	NWS
A/Nagasaki/08N072/2009(H1N1)	NNT		NST	NHT	NIN	NNT	NSS	NGT		NGS				NTT	NWS
A/Nebraska/01/2009(H1N1)	NNT		NST	NHT	NIN	NNT	NSS	NGT		NGS				NTT	NWS
A/Nebraska/05/2009(H1N1)	NNT		NST	NHT	NIN	NNT	NSS	NGT		NGS				NTT	NWS
A/Nebraska/06/2009(H1N1)	NNT		NST	NHT	NIN	NNT	NSS	NGT		NGS				NTT	NWS
A/Nevada/01/2009(H1N1)	NNT		NST	NHT	NIN	NNT	NSS	NGT		NGS				NTT	NWS
A/Nevada/02/2009(H1N1)	NNT		NST	NHT	NIN	NNT	NSS	NGT		NGS				NTT	NWS
A/New Mexico/01/2009(H1N1)	NNT		NST	NHT	NIN	NNT	NSS	NGT		NGS				NTT	NWS
A/New Mexico/02/2009(H1N1)	NNT		NST	NHT	NIN	NNT	NSS	NGT		NGS				NTT	NWS
A/New York/01/2009(H1N1)	NNT		NST	NHT	NIN	NNT	NSS	NXT		NGS				NTT	NWS
A/New York/02/2009(H1N1)	NNT		NST	NHT	NIN	NNT	NSS	NGT		NGS	NKT			NTT	NWS
A/New York/1692/2009(H1N1)	NNT		NST	NHT	NIN	NNT	NSS	NGT		NGS				NTT	NWS
A/New York/3052/2009(H1N1)	NNT		NST	NHT	NIN	NNT	NSS	NGT		NGS				NTT	NWS
A/New York/3095/2009(H1N1)	NNT		NST	NHT	NIN	NNT	NSS	NGT		NGS				NTT	NWS
A/New York/3150/2009(H1N1)	NNT		NST	NHT	NIN	NNT	NSS	NGT		NGS				NTT	NWS
A/New York/3315/2009(H1N1)	NNT		NST	NHT	NIN	NNT	NSS	NGT		NGS				NTT	NWS
A/New York/3442/2009(H1N1)	NNT		NST	NHT	NIN	NNT	NSS	NGT		NGS				NTT	NWS
A/New York/3467/2009(H1N1)	NNT		NST	NHT	NIN	NNT	NSS	NGT		NGS				NTT	NWS
A/New York/3768/2009(H1N1)	NNT		NST	NHT	NIN	NNT	NSS	NGT		NGS				NTT	NWS
A/New York/56/2009(H1N1)	NNT		NST	NHT	NIN	NNT	NSS	NGT		NGS				NTT	NWS
A/New York/62/2009(H1N1)	NNT		NST	NHT	NIN	NNT	NSS	NGT		NGS				NTT	NWS
A/New York/63/2009(H1N1)	NNT		NST	NHT	NIN	NNT	NSS	NGT		NGS				NTT	NWS
A/New York/64/2009(H1N1)	NNT		NST	NHT	NIN	NNT	NSS	NGT		NGS				NTT	NWS
A/New York/65/2009(H1N1)	NNT		NST	NHT	NIN	NNT	NSS	NGT		NGS				NTT	NWS
A/New York/66/2009(H1N1)	NNT		NST	NHT	NIN	NNT	NSS	NGT		NGS				NTT	NWS
A/Niigata/08F002/2009(H1N1)	NNT		NST	NHT	NIN	NNT	NSS	NGT	NRS	NGS				NTT	NWS
A/Niigata/08F009/2009(H1N1)	NNT		NST	NHT	NIN	NNT	NSS	NGT		NGS				NTT	NWS
A/Niigata/08F031/2009(H1N1)	NNT		NST	NHT	NIN	NNT	NSS	NGT		NGS				NTT	NWS
A/Niigata/08F036/2009(H1N1)	NNT		NST	NHT	NIN	NNT	NSS	NGT		NGS				NTT	NWS
A/Niigata/08F067/2009(H1N1)	NNT		NST	NHT	NIN	NNT	NSS	NGT		NGS				NTT	NWS
A/Niigata/08F093/2009(H1N1)	NNT		NST	NHT	NIN	NNT	NSS	NGT		NGS				NTT	NWS
A/Niigata/08F188/2009(H1N1)	NNT		NST	NHT	NIN	NNT	NSS	NRT		NGS				NTT	NWS
A/Niigata/08F306/2009(H1N1)	NNT		NST	NHT	NIN	NNT	NSS	NGT		NGS				NTT	NWS
A/Niigata/08F483/2009(H1N1)	NNT		NST	NHT	NIN	NNT	NSS	NGT		NGS				NTT	NWS
A/Niigata/08F491/2009(H1N1)	NNT		NST	NHT	NIN	NNT	NSS	NGT		NGS				NTT	NWS
A/Niigata/08F549/2009(H1N1)	NNT		NST	NHT	NIN	NNT	NSS	NGT		NGS				NTT	NWS
A/Niigata/08F631/2009(H1N1)	NNT		NST	NHT	NIN	NNT	NSS	NGT		NGS				NTT	NWS
A/Niigata/08F717/2009(H1N1)	NNT		NST	NHT	NIN	NNT	NSS	NGT	NRS	NGS				NTT	NWS
A/North Carolina/01/2009(H1N1)	NNT		NST	NHT	NIN	NNT	NSS	NGT		NGS				NTT	NWS
A/North Carolina/02/2009(H1N1)	NHT		NST	NHT	NIN	NNT	NSS	NGT		NGS				NTT	NWS
A/North Dakota/01/2009(H1N1)	NNT		NST	NHT	NIN	NNT	NSS	NGT		NGS				NTT	NWS
A/North Dakota/02/2009(H1N1)	NNT		NST	NHT	NIN	NNT	NSS	NGT		NGS				NTT	NWS
A/North Dakota/03/2009(H1N1)	NNT		NST	NHT	NIN	NNT	NSS	NGT		NGS				NTT	NWS
A/Novosibirsk/1062/2009(H1N1)	NNT		NST	NHT	NIN	NNT	NSS	NGT		NGS				NTT	NWS
A/Novosibirsk/151/2009(H1N1)	NNT		NST	NHT	NIN	NNT	NSS	NGT		NGS				NTT	NWS
A/Novosibirsk/2/2009(H1N1)	NNT		NST	NHT	NIN	NNT	NSS	NGT		NGS				NTT	NWS
A/Novosibirsk/3/2009(H1N1)	NNT		NST	NHT	NIN	NNT	NSS	NRT		NGS				NTT	NWS
A/Novosibirsk/4/2009(H1N1)	NNT		NST	NHT	NIN	NNT	NSS	NGT		NGS				NTT	NWS
A/Novosibirsk/653/2009(H1N1)	NHT		NST	NHT	NIN	NNT	NSS	NGT		NGS				NTT	NWS
A/Novosibirsk/7/2009(H1N1)	NNT		NST	NHT	NIN	NNT	NSS	NGT		NGS				NTT	NWS
A/Novosibirsk/716/2009(H1N1)	NNT		NST	NHT	NIN	NNT	NSS	NGT		NGS				NTT	NWS
A/Novosibirsk/8/2009(H1N1)	NNT		NST	NHT	NIN	NNT	NSS	NGT		NGS				NTT	NWS
A/Ohio/01/2009(H1N1)	NNT		NST	NHT	NIN	NNT	NSS	NGT		NGS				NTT	NWS
A/Ohio/03/2009(H1N1)	NNT		NST	NHT	NIN	NNT	NSS	NGT		NGS				NTT	NWS
A/Ohio/04/2009(H1N1)	NNT		NST	NHT	NIN	NNT	NSS	NGT		NGS				NTT	NWS
A/Ohio/05/2009(H1N1)	NNT		NST	NHT	NIN	NNT	NSS	NGT		NGS				NTT	NWS
A/Ohio/06/2009(H1N1)	NNT		NST	NHT	NIN	NNT	NSS	NGT		NGS				NTT	NWS
A/Oklahoma/1138/2009(H1N1)	NNT		NST	NHT	NIN	NNT	NSS	NGT		NGS				NTT	NWS
A/Oklahoma/V205S/2009(H1N1)	NNT		NST	NHT	NIN	NNT	NSS	NGT		NGS				NTT	NWS
A/Oregon/01/2009(H1N1)	NNT		NST	NHT	NIN	NNT	NSS	NGT		NGS				NTT	NWS
A/Oregon/02/2009(H1N1)	NNT		NST	NHT	NIN	NNT	NSS	NGT		NGS				NTT	NWS
A/Pennsylvania/01/2009(H1N1)	NNT		NST	NHT	NIN	NNT	NSS	NGT		NGS				NTT	NWS
A/Pennsylvania/01/2009(H1N1)	NNT		NST	NHT	NIN	NNT	NSS	NGT		NGS				NTT	NWS
A/Pennsylvania/03/2009(H1N1)	NNT		NST	NHT	NIN	NNT	NSS	NGT		NGS				NTT	NWS
A/Pennsylvania/11/2009(H1N1)	NNT		NST	NHT	NIN	NNT	NSS	NGT		NGS				NTT	NWS
A/Pennsylvania/12/2009(H1N1)	NNT		NST	NHT	NIN	NNT	NSS	NGT		NGS				NTT	NWS
A/Rhode Island/01/2009(H1N1)	NNT		NST	NHT	NIN	NNT	NSS	NGT		NGS				NTT	NWS
A/Saskatchewan/5131/2009(H1N1)	NNT		NST	NHT	NIN	NNT	NSS	NGT		NGS				NTT	NWS
A/Saskatchewan/5350/2009(H1N1)	NNT		NST	NHT	NIN	NNT	NSS	NGT		NGS				NTT	NWS
A/Saskatchewan/5351/2009(H1N1)	NNT		NST	NHT	NIN	NNT	NSS	NGT		NGS				NTT	NWS
A/Shanghai/LWS1/2009(H1N1)	NNT		NST	NHT	NIN	NNT	NSS	NGT		NGS				NTT	NWS
A/Singapore/DSO20090018/2009(H1N1)	NNT		NST	NHT	NIN	NNT	NSS	NGT		NGS				NTT	NWS
A/Singapore/DSO20090024/2009(H1N1)	NNT		NST	NHT	NIN	NNT	NSS	NGT		NGS				NTT	NWS
A/South Dakota/01/2009(H1N1)	NNT		NST	NHT	NIN	NNT	NSS	NGT		NGS				NTT	NWS
A/South Dakota/02/2009(H1N1)	NNT		NST	NHT	NIN	NNT	NSS	NGT		NGS				NTT	NWS
A/Tehran/310/2009(H1N1)	NNT		NST	NHT	NIN	NNT	NSS	NGT		NGS				NTT	NWS
A/Tehran/345/2009(H1N1)	NNT		NST	NHT	NIN	NNT	NSS	NGT		NGS				NTT	NWS
A/Tehran/359/2009(H1N1)	NNT		NST	NHT	NIN	NNT	NSS	NGT		NGS				NTT	NWS
A/Tennessee/01/2009(H1N1)	NNT		NST	NHT	NIN	NNT	NSS	NGT		NGS				NTT	NWS
A/Tennessee/02/2009(H1N1)	NNT		NST	NHT	NIN	NNT	NSS	NGT		NGS				NTT	NWS
A/Tennessee/04/2009(H1N1)	NNT		NST	NHT	NIN	NNT	NSS	NGT		NGS				NTT	NWS
A/Texas/01/2009(H1N1)	NNT		NST	NHT	NIN	NNT	NSS	NGT		NGS				NTT	NWS
A/Texas/01/2009(H1N1)	NNT		NST	NHT	NIN	NNT	NSS	NGT		NGS				NTT	NWS
A/Texas/38/2009(H1N1)	NNT		NST	NHT	NIN	NNT	NSS	NGT		NGS				NTT	NWS
A/Thailand/CU-B267/2009(H1N1)	NNT		NNT	NHT	NIN	NNT	NSS	NGT		NGS				NTT	NWS
A/Thailand/CU-B42/2009(H1N1)	NNT		NST	NHT	NIN	NNT	NSS	NGT		NGS				NTT	NWS
A/Thailand/CU-B589/2009(H1N1)	NNT		NST	NHT	NIN	NNT	NSS	NGT		NGS				NTT	NWS
A/Thailand/CU-B685/2009(H1N1)	NNT		NST	NHT	NIN	NNT	NSS	NGT		NGS				NTT	NWS
A/Thailand/CU-B97/2009(H1N1)	NNT		NST	NHT	NIN	NNT	NSS	NGT		NGS				NTT	NWS
A/Thailand/CU-H17/2009(H1N1)	NNT		NST	NHT	NIN	NNT	NSS	NGT		NGS				NTT	NWS
A/Thailand/CU-H223/2009(H1N1)	NNT		NST	NHT	NIN	NNT	NSS	NGT		NGS				NTT	NWS
A/Thailand/CU-H565/2009(H1N1)	NNT		NST	NHT	NIN	NNT	NSS	NGT		NGS	NKT			NTT	NWS
A/Tottori/08T027/2009(H1N1)	NNT		NST	NHT	NIN	NNT	NSS	NGT		NGS				NTT	NWS
A/Tottori/08T047/2009(H1N1)	NNT		NST	NHT	NIN	NNT	NSS	NGT		NGS				NTT	NWS
A/Tottori/08T099/2009(H1N1)	NNT		NST	NHT	NIN	NNT	NSS	NGT	NRS	NGS				NTT	NWS
A/Tottori/08T121/2009(H1N1)	NNT		NST	NHT	NIN	NNT	NSS	NGT		NGS				NTT	NWS
A/Tottori/08T125/2009(H1N1)	NNT		NST	NHT	NIN	NNT	NSS	NGT		NGS				NTT	NWS
A/Utah/12/2009(H1N1)	NNT		NST	NHT	NIN	NNT	NSS	NGT		NGS				NTT	NWS
A/Utah/12/2009(H1N1)	NNT		NST	NHT	NIN	NNT	NSS	NGT		NGS				NTT	NWS
A/Vermont/01/2009(H1N1)	NNT		NST	NHT	NIN	NNT	NSS	NGT		NGS				NTT	NWS
A/Virginia/03/2009(H1N1)	NNT		NST	NHT	NIN	NNT	NSS	NGT		NGS				NTT	NWS
A/Virginia/06/2009(H1N1)	NNT		NST	NHT	NIN	NNT	NLS	NGT		NGS				NTT	NWS
A/Vladivostok/08R06/2009(H1N1)	NNT		NST	NHT	NIN	NNT	NSS	NGT		NGS				NTT	NWS
A/Vladivostok/08R07/2009(H1N1)	NNT		NST	NHT	NIN	NNT	NSS	NGT		NGS				NTT	NWS
A/Vladivostok/08R12/2009(H1N1)	NNT		NST	NHT	NIN	NNT	NSS	NGT	NRS	NGS				NTT	NWS
A/Vladivostok/08R14/2009(H1N1)	NHT		NST	NHT	NIN	NNT	NSS	NGT		NGS				NTT	NWS
A/Vladivostok/08R15/2009(H1N1)	NNT		NST	NHT	NIN	NNT	NSS	NGT		NGS				NTT	NWS
A/Vladivostok/08R16/2009(H1N1)	NHT		NST	NHT	NIN	NNT	NSS	NGT		NGS				NTT	NWS
A/Vladivostok/08R17/2009(H1N1)	NNT		NST	NHT	NIN	NNT	NSS	NGT		NGS				NTT	NWS
A/Vladivostok/08R18/2009(H1N1)	NNT		NST	NHT	NIN	NNT	NSS	NGT		NGS				NAT	NWS
A/Vladivostok/08R19/2009(H1N1)	NHT		NST	NHT	NIN	NNT	NSS	NGT		NGS				NTT	NWS
[truncated: 52 more rows]

## Sheet: Human pandemic
Potential glycosites on NA in human pandemic 2009 A/H1N1 viruses
Location	Stalk				Head
Strains	50	58	63	68	88	146	235	386
A/Brevig Mission/1/1918(H1N1)	NQS	NNT	NQT	NIS	NSS	NGT	NGS
Pandemic 2009 strains (702)	NQS	NNT	NQT	NIS	NSS	NGT	NGS	NFS
Numbers of strains that have corresponding glycosites	702	702	702	702	701	712	702	697
Conservation (%)	100	100	100	100	99.8575	101.425	100	99.2877
A/Xian/009/2009(H1N1)					NFS
A/Canada-QC/RV1759/2009(H1N1)						NET
A/Orenburg/IIV-13/2010(H1N1)								XFS
A/Karasuk/01/2010(H1N1)								KFS
A/Tomsk/08/2009(H1N1)								KFS
A/Salekhard/01/2009(H1N1)								KFS
A/Tver/IIV-183/2009(H1N1))								KFS
The sequence in each unit of table represents the corresponding sequon of each site. The potential glycosites were highlighted by filling the units in yellow.

## Sheet: Avian
Potential glycosites on NA in avian influenza A/H1N1 viruses
Location	Stalk						Head
Strains	44	50	58	63	68	70	88	146	235	365	434	455	Note
A/Duck/Ohio/175/86 (H1N1)		NQS	NNT	NQT	NIS		NSS	NGT	NGS
A/Duck/Ohio/30/86 (H1N1)		NQS	NNT	NQT	NIS		NSS	NGT	NGS
A/Duck/Ohio/194/86 (H1N1)		NQS	NNT	NQT	NIS		NSS	NGT	NGS
A/Duck/Ohio/118C/93 (H1N1)		NQS	NNT	NQT	NIS		NSS	NGT	NGS
A/mallard/Alberta/35/1976(H1N1)		NQS	NNT	NQT	NIS		NSS	NGT	NGS
A/quail/Nanchang/12-340/2000(H1N1)	NHT	NQR	NST	NHT	NIN	NNT	NSS	NGT	NGS		NTT	NWS
A/duck/Miyagil/9/1977(H1N1)		NQS	NNT	NQT	NIS		NSS	NGT	NGS
A/mallard/Alberta/99/91(H1N1)		NQS	NNT	NQT	NIS		NSS	NGT	NGS
A/turkey/France/87075/87(H1N1)		NQS	NNT	NQT	NIS		NSS	NGT	NGS
A/mallard/Alberta/211/98(H1N1)		NQS	NNT	NQT	NIS		NSS	NGT	NGS
A/mallard/Alberta/65/1976(H1N1)		NQS	NNT	NQT	NIS		NSS	NGT	NGS
A/mallard/Alberta/46/1977(H1N1)		NQS	NNT	NQT	NIS		NSS	NGT	NGS
A/pintail duck/ALB/219/1977(H1N1)		NQS	NNT	NQT	NIS		NSS	NGT	NGS
A/pintail duck/ALB/238/1979(H1N1)		NQS	NNT	NQT	NIS		NSS	NGT	NGS				221NNT
A/mallard/Alberta/965/1979(H1N1)		NQS	NNT	NQT	NIS		NSS	NGT	NGS
A/mallard/Alberta/267/1996(H1N1)		NQS	NNT	NQT	DIS		NSS	NGT	NGS
A/mallard/ALB/201/1998(H1N1)		NQS	NNT	NQT	NIS		NSS	NGT	NGS
A/mallard/Alberta/322/1988(H1N1)		NQS	NNT	NQT	NIS		NSS	NGT	NGS
A/pintail duck/Alberta/210/2002(H1N1)		NQS	NNT	NQT	NIS		NSS	NGT	NGS
A/mallard/Alberta/127/1977(H1N1)		NQS	NNT	NQT	NIS		NSS	NGT	NGS
A/quail/Nanchang/12-340/2000(H1N1)	NHT	NQR	NST	NHT	NIN	NNT	NSS	NGT	NGS		NTT	NWS
A/duck/Australia/749/1980(H1N1)		NQS	NNT	NQT	NIS		NSS	NGT	NGS
A/mallard/Alberta/35/1976(H1N1)		NQS	NNT	NQT	NIS		NSS	NGT	NGS
A/pigeon/MN/1407/1981(H1N1)		NQS	NNT	NQT	NIS		NSS	NGT	NGS
A/Pekin Duck/France/M-2060/01 (H1N1)		NQS	NNT	NQT	NIS		NSS	NGT	NGS
A/Mallard/France/D-691/02 (H1N1)		NQS	NNT	NQT	NIS		NSS	NGT	NGS
A/Mallard/France/D-710/02 (H1N1)		NQS	NNT	NQT	NIS		NSS	NGT	NGS
A/mallard/Ohio/171/1990(H1N1)		NQS	NNT	NQT	NIS		NSS	NGT	NGS
A/green-winged teal/Ohio/430/1987(H1N1)		NQS	NNT	NQT	NIS		NSS	NGT	NGS
A/mallard/Ohio/56/1999(H1N1)		NQS	NNT	NQT	NIS		NSS	NGT	NGS
A/duck/Miyagi/66/1977(H1N1)		NQS	NNT	NQT	NIS		NSS	NGT	NGS
A/swan/Hokkaido/55/1996(H1N1)		NQS	NNT	NQT	NIS		NSS	NGT	NGS
A/blue-winged teal/Alberta/141/1992(H1N1)		NQS	NNT	NQT	NIS		NSS	NGT	NGS
A/mallard/Tennessee/11464/1985(H1N1)		NQS	NNT	NQT	NIS		NSS	NGT	NGS
A/black duck/Ohio/95/1993(H1N1)		NQS	NNT	NQT	NIS		NSS	NGT	NGS
A/mallard/Ohio/66/1999(H1N1)		NQS	NNT	NQT	NIS		NSS	NGT	NGS
A/green-winged teal/Ohio/72/1999(H1N1)		NQS	NNT	NQT	NIS		NSS	NGT	NGS
A/pintail/Ohio/25/1999(H1N1)		NQS	NNT	NQT	NIS		NSS	NGT	NGS
A/mallard/Ohio/118/1993(H1N1)		NQS	NNT	NQT	NIS		NSS	NGT	NGS
A/mallard/Maryland/161/2002(H1N1)		NQS	NNT	NQT	NIS		NSS	NGT	NGS
A/mallard/Maryland/168/2002(H1N1)		NQS	NNT	NQT	NIS		NSS	NGT	NGS
A/mallard/Maryland/170/2002(H1N1)		NQS	NNT	NQT	NIS		NSS	NGT	NGS
A/mallard/Maryland/352/2002(H1N1)		NQS	NNT	NQT	NIS		NSS	NGT	NGS
A/mallard/Maryland/369/2002(H1N1)		NQS	NNT	NQT	NIS		NSS	NGT	NGS
A/mallard/Maryland/382/2002(H1N1)		NQS	NNT	NQT	NIS		NSS	NGT	NGS
A/mallard/Maryland/390/2002(H1N1)		NQS	NNT	NQT	NIS		NSS	NGT	NGS
A/mallard/Maryland/403/2002(H1N1)		NQS	NNT	NQT	NIS		NSS	NGT	NGS
A/duck/NY/13152-13/1994(H1N1)		NQS	NNT	NQT	NIS		NSS	NGT	NGS
A/mallard/Maryland/406/2002(H1N1)		NQS	NNT	NQT	NIS		NSS	NGT	NGS
A/duck/NJ/7717-70/1995(H1N1)		NQS	NNT	NQT	NIS		NSS	NGT	NGS
A/blue-winged teal/LA/B228/1986(H1N1)		NQS	NNT	NQT	NIS		NSS	NGT	NGS
A/duck/NJ/7717-70/1995(H1N1)		NQS	NNT	NQT	NIS		NSS	NGT	NGS
A/duck/NY/13152-13/1994(H1N1)		NQS	NNT	NQT	NIS		NSS	NGT	NGS
A/duck/NY/15024-21/1996(H1N1)		NQS	NNT	NQT	NIS		NSS	NGT	NGS
A/green-winged teal/Louisiana/213GW/1987(H1N1)		NQS	NNT	NQT	NIS		NSS	NGT	NGS
A/mallard/Maryland/321/2002(H1N1)		NQS	NNT	NQT	NIS		NSS	NGT	NGS
A/quail/IN/38685/1993(H1N1)		NQS	NNT	NQT	NIS		NSS	NGT	NGS
A/mallard/Maryland/163/2002(H1N1)		NQS	NNT	NQT	NIS		NSS	NGT	NGS
A/mallard/Maryland/168/2002(H1N1)		NQS	NNT	NQT	NIS		NSS	NGT	NGS
A/mallard/Maryland/170/2002(H1N1)		NQS	NNT	NQT	NIS		NSS	NGT	NGS
A/mallard/Maryland/181/2002(H1N1)		NQS	NNT	NQT	NIS		NSS	NGT	NGS
A/mallard/Maryland/307/2002(H1N1)		NQS	NNT	NQT	NIS		NSS	NGT	NGS
A/mallard/Maryland/322/2002(H1N1)		NQS	NNT	NQT	NIS		NSS	NGT	NGS
A/mallard/Maryland/334/2002(H1N1)		NQS	NNT	NQT	NIS		NSS	NGT	NGS
A/mallard/Maryland/352/2002(H1N1)		NQS	NNT	NQT	NIS		NSS	NGT	NGS
A/mallard/Maryland/369/2002(H1N1)		NQS	NNT	NQT	NIS		NSS	NGT	NGS
(A/mallard/Maryland/382/2002(H1N1)		NQS	NNT	NQT	NIS		NSS	NGT	NGS
A/mallard/Maryland/390/2002(H1N1)		NQS	NNT	NQT	NIS		NSS	NGT	NGS
A/mallard/Maryland/403/2002(H1N1)		NQS	NNT	NQT	NIS		NSS	NGT	NGS
A/mallard/Maryland/304/2002(H1N1)		NQS	NNT	NQT	NIS		NSS	NGT	NGS
A/mallard/Maryland/350/2002(H1N1)		NQS	NNT	NQT	NIS		NSS	NGT	NGS
A/mallard/Maryland/02-163/2002(H1N1)		NQS	NNT	NQT	NIS		NSS	NGT	NGS
A/mallard/Maryland/02-358/2002(H1N1)		NQS	NNT	NQT	NIS		NSS	NGT	NGS
A/muscovy duck/New York/21211-5/2005(H1N1)		NQS	NNT	NQT	NIS		NSS	NGT	NGS
A/duck/Eastern China/103/2003(H1N1)		NQS	NNT	NQT	NIS		NSS	NGT	NGS
A/duck/Eastern China/152/2003(H1N1)		NQS	NNT	NQT	NIS		NSS	NGT	NGS
A/mallard/Maryland/350/2002(H1N1)		NQS	NNT	NQT	NIS		NSS	NGT	NGS
A/turkey/Kansas/4880/1980 (H1N1)		NQS	NNT	NQT	NIS		NSS	NGT	NGS
A/quail/IN/38685/1993(H1N1)		NQS	NNT	NQT	NIS		NSS	NGT	NGS
A/chicken/PA/35154/1991(H1N1)		NQS	NNT	NQT	NIS		NSS	NGT	NGS
A/turkey/NC/19762/1988(H1N1)	NHS	SQN	NNT	NQT	NIS		NSS	NGT	NGS
A/chicken/NY/21665-73/1998(H1N1)	NHS	NQN	NKT	NQT	NIS		NSS	NGT	NGS
A/mallard/Maryland/02-375/2002(H1N1)		NQS	NNT	NQT	NIS		NSS	NGT	NGS
A/mallard/Maryland/02-359/2002(H1N1)		NQS	NNT	NQT	NIS		NSS	NGT	NGS
A/mallard/Maryland/02-184/2002(H1N1)		NQS	NNT	NQT	NIS		NSS	NGT	NGS
A/mallard/Maryland/02-181/2002(H1N1)		NQS	NNT	NQT	NIS		NSS	NGT	NGS
A/blue winged teal/LA/B228/1986(H1N1)		NQS	NNT	NQT	NIS		NSS	NGT	NGS
A/turkey/SD/7034/1986(H1N1)		NQS	NNT	NQT	NIS		NSS	NGT	NGS				386NFS
A/turkey/IA/21089-3/1992(H1N1)	NHS	NQN	NNT	NQT	NIS		NSS	NGT	NGS
A/turkey/IA/10271-3/1990(H1N1)	NHS	SQN	NNT	NQT	NIS		NSP	NGT	NGS
A/turkey/MO/21939/1987(H1N1)	NHP	NQN	NNT	NQT	NIS		NSS	NGT	NGS
A/mallard/Maryland/199/2003(H1N1)		NQS	NNT	NQT	NIS		NSS	NGT	NGS
A/mallard/Maryland/11/2003(H1N1)		NQS	NNT	NQT	NIS		NSS	NGT	NGS
A/mallard/Maryland/53/2003(H1N1)		NQS	NNT	NQT	NIS		NSS	NGT	NGS
A/mallard/Maryland/42/2003(H1N1)		NQS	NNT	NQT	NIS		NSS	NGT	NGS
A/mallard/Maryland/41/2003(H1N1)		NQS	NNT	NQT	NIS		NSS	NGT	NGS
A/mallard/Maryland/26/2003(H1N1)		NQS	NNT	NQT	NIS		NSS	NGT	NGS
A/turkey/NC/17026/1988(H1N1)	NHS	SQN	NNT	NQT	NIS		NSS	NGT	NGS
A/blue winged teal/TX/43/2002(H1N1)		NQS	NNT	NQT	NIS		NSS	NGT	NGS
A/blue winged teal/TX/27/2002(H1N1)		NQS	NNT	NQT	NIS		NSS	NGT	NGS
A/duck/Italy/69238/2007(H1N1)		NQS	NNT	NQT	NIS		NSS	NGT	NGS
A/duck/Italy/281904/2006(H1N1)		NQS	NNT	NQT	NIS		NSS	NGT	NGS
A/goose/Italy/296426/2003(H1N1)		NQS	NNT	NQT	NIS		NSS	NGT	NGS
A/mallard/France/691/2002(H1N1)		NQS	NNT	NQT	NIS		NSS	NGT	NGS
A/duck/Hokkaido/83/2004(H1N1)		NQS	NNT	NQT	NIS		NSS	NGT	NGS
A/duck/Hokkaido/w73/2007(H1N1)		NQS	NNT	NQT	NIS		NSS	NGT	NGS
A/duck/Mongolia/116/2002(H1N1)		NQS	NNT	NQT	NIS		NSS	NGT	NGS
A/duck/Mongolia/253/2003(H1N1)		NQS	NNT	NQT	NIS		NSS	NGT	NGS
A/duck/Mongolia/540/2001(H1N1)		NQS	NNT	NQT	NIS		NSS	NGT	NGS
A/duck/Mongolia/610/2002(H1N1)		NQS	NNT	NQT	NIS		NSS	NGT	NGS
A/northern pintail/Interior Alaska/1/2007(H1N1)		NQS	NNT	NQT	NIS		NSS	NGT	NGS
A/duck/Tsukuba/67/2005(H1N1)		NQS	NNT	NQT	NIS		NSS	NGT	NGS
A/duck/Tsukuba/718/2005(H1N1)		NQS	NNT	NQT	NIS		NSS	NGT	NGS
A/red-winged tinamou/Argentina/MP1/2008(H1N1)		NQS	NNT	NQT	NIS		NSS	NGT	NGS
A/Anas plathyrhynchos/Spain/1266/2007(H1N1)		NQS	NNT	NQT	NIS		NAS	NGT	NGS
A/Anas plathyrhynchos/Spain/1365/2007(H1N1)		NQS	NNT	NQT	NIS		NAS	NGT	NGS
A/Anas crecca/Spain/1384/2007(H1N1)		NQS	NNT	NQT	NIS		NAS	NGT	NGS
A/Anas crecca/Spain/1402/2007(H1N1)		NQS	NNT	NQT	NIS		NAS	NGT	NGS
A/Anas crecca/Spain/1404/2007(H1N1)		NQS	NNT	NQT	NIS		NAS	NGT	NGS
A/dunlin/Alaska/44421-660/2008(H1N1)		NQS	NNT	NQT	NIS		NSS	NGT	NGS
A/green-winged teal/Louisiana/Sg-00090/2007(H1N1)		NQS	NNT	NQT	NIS		NSS	NGT	NGS
A/mallard duck/Minnesota/Sg-00121/2007(H1N1)		NQS	NNT	NQT	NIS		NSS	NGT	NGS
A/mallard/Minnesota/Sg-00122/2007(H1N1)		NQS	NNT	NQT	NIS		NSS	NGT	NGS
A/redheaded duck/Minnesota/Sg-00123/2007(H1N1)		NQS	NNT	NQT	NIS		NSS	NGT	NGS
A/green-winged teal/Minnesota/Sg-00137/2007(H1N1)		NQS	NNT	NQT	NIS		NSS	NGT	NGS
A/northern shoveler/Minnesota/Sg-00141/2007(H1N1)		NQS	NNT	NQT	NIS		NSS	NGT	NGS
A/mallard/Minnesota/Sg-00146/2007(H1N1)		NQS	NNT	NQT	NIS		NSS	NGT	NGS
A/mallard/Minnesota/Sg-00148/2007(H1N1)		NQS	NNT	NQT	NIS		NSS	NGT	NGS
A/mallard/Minnesota/Sg-00151/2007(H1N1)		NQS	NNT	NQT	NIS		NSS	NGT	NGS
A/redheaded duck/Minnesota/Sg-00152/2007(H1N1)		NQS	NNT	NQT	NIS		NSS	NGT	NGS
A/mallard/Minnesota/Sg-00217/2007(H1N1)		NQS	NNT	NQT	NIS		NSS	NGT	NGS
A/northern pintail/Minnesota/Sg-00227/2006(H1N1)		NQS	NNT	NQT	NIS		NSS	NGT	NGS
A/shorebird/Delaware/246/2006(H1N1)		NQS	NNT	NQT	NIS		NSS	NGT	NGS
A/shorebird/Delaware/558/2006(H1N1)		NQS	NNT	NQT	NIS		NSS	NGT	NGS
A/pintail/Alberta/21/2006(H1N1)		NQS	NNT	NQT	NIS		NSS	NGT	NGS
A/mallard/Bavaria/42/2006(H1N1)		NQS	NNT	NQT	NIS		NSS	NGT	NGS
A/wild duck/Bavaria/43/2006(H1N1)		NQS	NNT	NQT	NIS		NSS	NGT	NGS
A/wild duck/Bavaria/45/2006(H1N1)		NQS	NNT	NQT	NIS		NSS	NGT	NGS
A/mallard/Marquenterre/Z237/1983(H1N1))		NQS	NNT	NQT	NIS		NSS	NGT	NGS
A/mallard/Minnesota/Sg-00147/2007(H1N1)		NQS	NNT	NQT	NIS		NSS	NGT	NGS
A/mallard/Minnesota/Sg-00447/2008(H1N1)		NQS	NNT	NQT	NIS		NSS	NGT	NGS
A/mallard/Minnesota/Sg-00627/2008(H1N1)		NQS	NNT	NQT	NIS		NSS	NGT	NGS
A/northern shoveler/Minnesota/Sg-00651/2008(H1N1)		NQS	NNT	NQT	NIS		NSS	NGT	NGS
A/northern shoveler/Minnesota/Sg-00655/2008(H1N1)		NQS	NNT	NQT	NIS		NSS	NGT	NGS
A/northern pintail/Alaska/44344-745/2007(H1N1)		NQS	NNT	NQT	NIS		NSS	NGT	NGS
A/northern pintail/Alaska/44344-864/2007(H1N1)		NQS	NNT	NQT	NIS		NSS	NGT	NGS
A/northern pintail/Alaska/44344-801/2007(H1N1)		NQS	NNT	NQT	NIS		NSS	NGT	NGS
A/northern pintail/Alaska/44344-728/2007(H1N1)		NQS	NNT	NQT	NIS		NSS	NGT	NGS
A/northern pintail/Alaska/44344-718/2007(H1N1)		NQS	NNT	NQT	NIS		NSS	NGT	NGS
A/northern pintail/Alaska/44344-785/2007(H1N1)		NQS	NNT	NQT	NIS		NSS	NGT	NGS
A/northern pintail/Alaska/44344-787/2007(H1N1)		NQS	NNT	NQT	NIS		NSS	NGT	NGS
A/northern pintail/Alaska/44344-762/2007(H1N1)		NQS	NNT	NQT	NIS		NSS	NGT	NGS
A/duck/Alberta/35/1976(H1N1)		NQS	NNT	NQT	NIS		NSS	NGT	NGS
A/mallard/North Dakota/Sg-00722/2008(H1N1)		NQS	NNT	NQT	NIS		NSS	NGT	NGS
A/mallard/Minnesota/Sg-00579/2008(H1N1)		NQS	NNT	NQT	NIS		NSS	NGT	NGS
A/mallard/Alberta/88/2004(H1N1)		NQS	NNT	NQT	NIS		NSS	NGT	NGS
A/common teal/Netherlands/10/2000(H1N1)		NQS	NNT	NQT	NIS		NSS	NGT	NGS
A/mallard/Sweden/57/2003(H1N1)		NQS	NNT	NQT	NIS		NSS	NGT	NGS
A/Mallard/Norway/10_1671/2007(H1N1)		NQS	NNT	NQT	NIS		NSS	NGT	NGS
Total 159	7	151	159	159	156	2	158	159	159	0	2	2
Conservation (%)	4.40252	94.9686	100	100	98.1132	1.25786	99.3711	100	100	0	1.25786	1.25786
The sequence in each unit of table represents the corresponding sequon of each site. The potential glycosites were highlighted by filling the units in yellow.

## Sheet: Swine
Potential glycosites on NA in swine influenza A/H1N1 viruses
Location	Stalk						Head
Strains	44	50	58	63	68	70	88	146	235	341	365	386	398	434	449	455	Note
A/swine/Iowa/15/1930		NQS	NNT	NQT	NIS		NSS	NGT	NGS							GWS
A/swine/Iowa/15/1930		NQS	NNT	NQT	NIS		NSS	NGT	NGS							GWS
A/swine/USA/1976-MA/1931		NQS	NNT	NQT	NIS		NSS	NGT	NGS							GWS
A/swine/USA/1976/1931		NQS	NNT	NQT	NIS		NSS	NGT	NGS							GWS
A/swine/1931		NQS	NNT	NQT	NIS		NSS	NGT	NGS							GWS
A/swine/Ohio/23/1935		NQS	NNT	NQT	NIS		NSS	NGT	NGS							DWS
A/swine/Jamesburg/1942		NQS	NNT	NQT	NIS		NSS	NGT	NGS							GWS
A/swine/Iowa/1945		NQS	---	---	NIS		NSS	NGT	NGS							GWS
A/swine/Wisconsin/1/1957		NQS	NNT	NQT	NIS		NSS	NGT	NGS							NWS
A/swine/Wisconsin/1/1961		NQS	NNT	NQT	NIS		NSS	NGT	NGS							NWS
A/swine/Wisconsin/2/1966		NQS	NNT	NQT	NIS		NSS	NGT	NGS							NWS
A/swine/Wisconsin/1/1967		NQS	NNT	NQT	NIS		NSP	NGT	NGS							NWS
A/swine/Wisconsin/1/1968		NQS	NNT	NQT	NIS		NSS	NGT	NGS							NWS
A/swine/Wisconsin/2/1970		NQS	NNT	NQT	NIS		NSS	NGT	NGS							SWS
A/swine/Wisconsin/1/1971		NQS	NNT	NQT	NIS		NSS	NGT	NGS							SWS
A/swine/Iowa/1973		NQS	NNT	NQT	NIS		NSS	NGT	NGS							GWS
A/swine/Minnesota/24/1975		NQS	NNT	NQT	NIS		NSS	NGT	NGS
A/swine/Tennessee/1/1975		KQS	NNT	NQT	NIS		NSS	NGT	NGS
A/swine/Illinois/1/1975		KQS	NNT	NQT	NIS		NSS	NGT	NGS
A/swine/Wisconsin/30747/1976		NQS	NNT	NQT	NIS		NSS	NGT	NGS
A/swine/Iowa/1/1976		NQS	NNT	NQT	NIS		NSS	NGT	NGS
A/swine/Tennessee/19/1976		NQS	NNT	NQT	NIS		NSS	NGT	NGS
A/swine/Iowa/4/1976		NQS	NNT	NQT	NIS		NSS	NGT	NGS
A/swine/Tennessee/17/1976		NQS	NNT	NQT	NIS		NSS	NGT	NGS
A/swine/Tennessee/15/1976		NQS	NNT	NQT	NIS		NSS	NGT	NGS
A/swine/Tennessee/23/1976		NQS	NNT	NQT	NIS		NSS	NGT	NGS						NSS
A/swine/Tennessee/10/1976		NQS	NNT	NQT	NIS		NSS	NGT	NGS
A/swine/Tennessee/7/1976		NQS	NNT	NQT	NIS		NSS	NGT	NGS
A/swine/Tennessee/3/1976		NQS	NNT	NQT	NIS		NSS	NGT	NGS
A/swine/Kentucky/1/1976		NQS	NNT	NQT	NIS		NSS	NGT	NGS
A/swine/Minnesota/27/1976		NQS	NNT	NQT	NIS		NSS	NGT	NGS
A/swine/Wisconsin/30954/1976		NQS	NNT	NQT	NIS		NSS	NGT	NGS
A/swine/New Jersey/11/1976		NQS	NNT	NQT	NIS		NSS	NGT	NGS
A/swine/Tennessee/107/1977		NQS	NNT	NQT	NIS		NSS	NGT	NGS
A/swine/Iowa/1/1977		NQS	NNT	NQT	NIS		NSS	NGT	NGS
A/swine/Niigata/1/1977		NQS	NNT	NQT	NIS		NSS	NGT	NGS
A/swine/Tennessee/10/1977		NQS	NNT	NQT	NIS		NSS	NGT	NGS
A/swine/Iowa/100/1977		NQS	NNT	NQT	NIS		NSS	NGT	NGS
A/swine/Tennessee/105/1977		NQS	NNT	NQT	NIS		NSS	NGT	NGS
A/swine/Tennessee/106/1977		NQS	NNT	NQT	NIS		NSS	NGT	NGS
A/swine/Tennessee/112/1977		NQS	NNT	NQT	NIS		NSS	NGT	NGS
A/swine/Tennessee/118/1977		NQS	NNT	NQT	NIS		NSS	NGT	NGS
A/swine/Tennessee/61/1977		NQS	NNT	NQT	NIS		NSS	NGT	NGS
A/swine/Tennessee/96/1977		NQS	NNT	NQT	NIS		NSS	NGT	NGS
A/swine/Tennessee/84/1977		NQS	NNT	NQT	NIS		NSS	NGT	NGS
A/swine/Tennessee/86/1977		NQS	NNT	NQT	NIS		NSS	NGT	NGS
A/swine/Tennessee/87/1977		NQS	NNT	NQT	NIS		NSS	NGT	NGS
A/swine/Tennessee/88/1977		NQS	NNT	NQT	NIS		NSS	NGT	NGS
A/swine/Tennessee/19/1977		NQS	NNT	NQT	NIS		NSS	NGT	NGS
A/swine/Tennessee/21/1977		NQS	NNT	NQT	NIS		NSS	NGT	NGS
A/swine/Tennessee/31/1977		NQS	NNT	NQT	NIS		NSS	NGT	NGS
A/swine/Tennessee/49/1977		NQS	NNT	NQT	NIS		NSS	NGT	NGS
A/swine/Tennessee/64/1977		NQS	NNT	NQT	NIS		NSS	NGT	NGS
A/swine/Tennessee/37/1977		NQS	NNT	NQT	NIS		NSS	NGT	NGS
A/swine/Tennessee/109/1977		NQS	NNT	NQT	NIS		NSS	NGT	NGS
A/swine/Arizona/148/1977		NQS	NNT	NQT	NIS		NSS	NGT	NGS
A/swine/Tennessee/48/1977		NQS	NNT	NQT	NIS		NSS	NGT	NGS
A/swine/Tennessee/62/1977		NQS	NNT	NQT	NIS		NSS	NGT	NGS
A/swine/Tennessee/79/1977		NQS	NNT	NQT	NIS		NSS	NGT	NGS
A/swine/Tennessee/82/1977		NQS	NNT	NQT	NIS		NSS	NGT	NGS
A/swine/Tennessee/65/1977		NQS	NNT	NQT	NIS		NSS	NGT	NGS
A/swine/Nebraska/123/1977		NQS	NNT	NQT	NIS		NSS	NGT	NGS						NSS
A/swine/Tennessee/25/1977		NQS	NNT	NQT	NIS		NSS	NGT	NGS
A/swine/Tennessee/10/1978		NQS	NNT	NQT	NIS		NSS	NGT	NGS
A/swine/Tennessee/5/1978		NQS	NNT	NQT	NIS		NSS	NGT	NGS
A/swine/Tennessee/8/1978		NQS	NNT	NQT	NIS		NSS	NGT	NGS
A/swine/Tennessee/3/1978		NRS	NNT	NQT	NIS		NSS	NGT	NGS
A/swine/Tennessee/4/1978		NQS	NNT	NQT	NIS		NSS	NGT	NGS
A/swine/Tennessee/7/1978		NQS	NNT	NQT	NIS		NSS	NGT	NGS
A/swine/Tennessee/11/1978		NQS	NNT	NQT	NIS		NSS	NGT	NGS
A/swine/Tennessee/2/1978		NQS	NNT	NQT	NIS		NSS	NGT	NGS
A/swine/Tennessee/9/1978		NQS	NNT	NQT	NIS		NSS	NGT	NGS
A/swine/Belgium/WVL1/1979		NQS	NNT	NQT	NIS		NSS	NGT	NGS
A/swine/Kyoto/3/1979		NQS	NNT	NQT	NIS		NSS	NGT	NGS
A/swine/Minnesota/5892-7/1979		NQS	NNT	NQT	NIS		NSS	NGT	NGS
A/swine/Wisconsin/11/1980		NQS	NNT	NQT	NIS		NSS	NGT	NGS
A/swine/Wisconsin/641/1980		NQS	NNT	NQT	NIS		NSS	NGT	NGS
A/swine/Wisconsin/661/1980		NQS	NNT	NQT	NIS		NSS	NGT	NGS
A/swine/Wisconsin/8/1980		NQS	NNT	NQT	NIS		NSS	NGT	NGS
A/swine/Wisconsin/663/1980		NQS	NNT	NQT	NIS		NSS	NGT	NGS
A/swine/Wisconsin/629/1980		NQS	NNT	NQT	NIS		NSS	NGT	NGS
A/swine/Ontario/1/1981		NQS	NNT	NQT	NIS		NSP	NGT	NGS
A/swine/Hokkaido/2/1981		NQS	NNT	NQT	NIS		NSS	NGT	NGS
A/swine/Ontario/4/1981		NQS	NNT	NQT	NIS		NSP	NGT	NGS
A/swine/Ontario/7/1981		NQS	NNT	NQT	NIS		NSP	NGT	NGS
A/swine/Quebec/192/81		NQS	NNT	NQT	NIS		NSP	NGT	NGS
A/swine/Ontario/2/1981		NQS	NNT	NQT	NIS		NSP	NGT	NGS
A/swine/Ontario/3/1981		NQS	NNT	NQT	NIS		NSP	NGT	NGS
A/swine/Ontario/6/1981		NQS	NNT	NQT	NIS		NSP	NGT	NGS
A/swine/Lot/2979/82		NQS	NNT	NQT	NIS		NSS	NGT	NGS
A/swine/Belgium/1/83		NQS	NNT	NQT	NIS		NSS	NGT	NGS
A/swine/Belgium/WVL2/1983		NQS	NNT	NQT	NIS		NSS	NGT	NGS
A/swine/Skane/1321/1983		NQS	NNT	NQT	NIS		NSS	NGT	NGS
A/swine/France/WVL3/1984		NQS	NNT	NQT	NIS		NSS	NGT	NGS
A/swine/FiNIStere/3616/1984		NQS	NNT	NQT	NIS		NSS	NGT	NGS		NIS
A/swine/Belgium/74/85		NQS	NNT	NQT	NIS		NSS	NGT	NGS
A/swine/France/WVL4/1985		NQS	NNT	NQT	NIS		NSS	NGT	NGS
A/swine/Iowa/3/1985		NQN	NNT	NQT	NIS		NSS	NGT	NGS
A/swine/Iowa/1/1985		NQN	NNT	NQT	NIS		NSS	NGT	NGS
A/swine/Iowa/2/1985		NQN	NNT	NQT	NIS		NSS	NGT	NGS
A/swine/Iowa/1/1986		NQS	NNT	NQT	NIS		NSS	NGT	NGS
A/swine/Iowa/1/1987		NQS	NNT	NQT	NIS		NSS	NGT	NGS
A/swine/Kansas/3024/1987		SQN	NNT	NQT	NIS		NSS	NGT	NGS
A/swine/Italy/670/1987		NQS	NNI	NQT	NIS		NSS	NGT	NGS
A/swine/Iowa/2/1987		NQN	NNT	NQT	NIS		NSS	NGT	NGS
A/swine/Kansas/3228/1987		SQN	NNT	NQT	NIS		NSS	NGT	NGS
A/swine/Italy/671/1987		NQS	NNT	NQT	NIS		NSS	NGT	NGS
A/Swine/Indiana/1726/1988		SQN	NNT	NQT	NIS		NSS	NGT	NGS
A/swine/Wisconsin/1915/1988		SQN	NNT	NQT	NIS		NSS	NGT	NGS
A/swine/Iowa/31483/1988	NHS	SQN	NNT	NQT	NIS		NSS	NGT	NGS
A/Swine/Indiana/1726/1988		SQN	NNT	NQT	NIS		NSS	NGT	NGS
A/swine/Wisconsin/1915/1988		SQN	NNT	NQT	NIS		NSS	NGT	NGS
A/swine/Iowa/17672/1988		SQN	NNT	NQT	NIS		NSS	NGT	NGS
A/swine/Belgium/WVL5/1989		NQS	NNT	NQT	NIS		NSS	NGT	NGS
A/swine/Memphis/1/1990	NHS	SQN	NNT	NQT	NIS		NSS	NGT	NGS
A/swine/Quebec/5393/91	NHS	NQN	NNT	NQT	NIS		NSS	NGT	NGS
A/swine/Maryland/23239/1991	NHS	NQN	NNT	NQT	NIS		NSS	NGT	NGS
A/swine/Iowa/24297/1991	NHS	NQN	NNT	NQT	NIS		NSS	NGT	NGS
A/swine/Spain/WVL6/1991		NQS	NNT	NQT	NIS		NSS	NGT	NGS
A/swine/California/T9001707/1991	NHS	SQN	NNT	NQT	NIS		NSS	NGT	NGS
A/sw/Obihiro/5/1992	NHT	NQR	NST	NQT	NIS		NSS	NGT	NGS
A/swine/England/WVL7/1992		NQS	NNT	NQT	NIS		NSS	NGT	NGS			NFS
A/swine/France/WVL8/1992		NQS	NNT	NQT	NIS		NSS	NGT	NGS
A/swine/England/195852/1992		NQS	NNT	NQT	NIS		NSS	NGT	NGS			NFS
A/swine/England/WVL10/1993		NQS	NNT	NQT	NIS		NSS	NGT	NGS			NFS
A/swine/Denmark/WVL9/1993		NQS	NNT	NQT	NIS		NSS	NGT	NGS			NFS
A/swine/Hong Kong/103/1993		NQN	NNT	NQT	NIS		NSS	NGT	NGS
A/swine/England/WVL11/1994		NQS	NNT	NQT	NIS		NSS	NGT	NGS
A/swine/France/WVL13/1995		NQS	NNT	NQT	NIS		NSS	NGT	NGS
A/swine/Italy/1424-4/95		NQS	NNT	NQT	NIS		NSS	NGT	NGS			NFS
A/swine/Germany/Vi5698/1995		NHS	NNT	NQT	NIS		NSS	NGT	NGS			NFS
A/swine/England/WVL14/1996		NQS	NNT	NQT	NIS		NSS	NGT	NGS			NFS
A/swine/England/WVL15/1997		NQS	NNT	NQT	NIS		NSS	NGT	NGS
A/swine/Italy/1509-6/97		NQS	NNT	NQT	NIS		NSS	NGT	NGS			NFS
A/swine/Wisconsin/238/97		NQN	NKT	NQT	NIS		NSS	NGT	NGS
A/swine/Belgium/1/1998		NQS	NNT	NQT	NIS		SSS	NGT	NGS			NFS
A/swine/England/WVL16/1998		NKS	NNT	NQT	NIS		NSS	NGT	NGS
A/swine/Cotes d'Armor/1488/1999		NQS	NNT	NQT	NIS		NSS	NGT	NGS			NFS
A/swine/Ille et Vilaine/1455/1999		NQS	NNT	NQT	NIS		NSS	NGT	NGS			NFS
A/swine/Cotes d'Armor/1482/1999		NQS	NNT	NQT	NIS		NSS	NGT	NGS
A/swine/Cotes d'Armor/1515/1999		NQS	HNT	NQT	NIS		NSS	NGT	NGS
A/swine/Minnesota/37866/1999	NHS	NQN	NNT	NQT	NIS		NSS	NGT	NGS
A/swine/Scotland/WVL17/1999		NQS	NNT	NQT	NIS		NSS	NGT	NGS			NFS
A/swine/Ratchaburi/NIAH1481/2000		NRS	NNT	NQT	NIS		NSS	NGT	NGS			NFS
A/swine/Cotes d'Armor/98574/2001		NQS	NNT	NQT	NIS		NSS	NGT	NGS			NFS
A/swine/Cotes d'Armor/60293/2001		NQS	NNT	NQT	NIS		NSS	NGT	NGS			NFS
A/swine/Hong Kong/8512/2001		NQS	NNT	NQT	NIS		NSS	NGT	NGS			NFS
A/swine/Hong Kong/NS837/2001	NHS	NQN	NNT	NQT	NIS		NSS	NGT	NGS
A/swine/Hong Kong/9656/2001	NHS	NQN	NKT	NQT	NIS		SSS	NGT	NGS
A/swine/Hong Kong/NS1659/2001	NHS	NQN	NNT	NQT	NVS		NSS	NGT	NGS
A/swine/Guangdong/103/2002	NHS	NRN	NST	NQT	NIS		NSS	NGT	NGS
A/swine/North Carolina/36883/2002	NHS	SQN	NNT	NQT	NIS		NSS	NGT	NGS
A/swine/Saskatchewan/18789/02		NQS	NNT	NQT	NIS		NSS	NGT	NGS						35NHS
A/swine/MN/48683/2002	NHT	NQN	NNT	NRT	TIS		NSS	NGT	NGS
A/swine/Ontario/57561/03	NHS	NQN	NNT	NRT	NIS		NSS	NGT	NGS
A/swine/Alberta/56626/03	NHS	SQN	NNT	NQT	NIS		NSS	NGT	NGS
A/swine/Ontario/53518/03	NHS	NQN	NNT	NRT	NIS		NSS	NGT	NGS
A/swine/Spain/51915/2003	NQT	NQS	NNT	NQT	NIS		SSP	NGT	NGS
A/swine/North Carolina/43951/2003		NQN	NNT	NQT	NIS		NSS	NGT	NGS
A/swine/North Carolina/44012/2003	NHS	SQN	NNT	NQT	NIS		NSS	NGT	NGS
A/swine/North Carolina/43110/2003		SQN	NNT	NQT	NIS		NSS	NGT	NGS
A/swine/North Carolina/7571/2003		NQN	NNT	NQT	NIS		NSS	NGT	NGS
A/swine/Spain/50047/2003		NQS	NNT	NQT	NIN		NSS	NGT	NGS			NFS
A/swine/Ratchaburi/NIAH550/2003		NQS	NNT	NQT	NIS		NSS	NGT	NGS			NFS
A/swine/North Carolina/46203/2003		SQN	NNT	NQT	NIS		NSS	NGT	NGS
A/swine/North Carolina/46858/2003		NQN	NNT	NQT	NIS		NSS	NGT	NGS
A/swine/North Carolina/47437/2003		SQN	NNT	NQT	NIS		NSS	NGT	NGS
A/swine/North Carolina/9647/2003	NYS	SQS	NNT	NQT	NIS		NSS	NGT	NGS
A/swine/North Carolina/28126/2003		SQN	NNT	NQT	NIS		NSS	NGT	NGS
A/swine/North Carolina/43904/2003		SQN	NNT	NQT	NIS		NSS	NGT	NGS
A/swine/North Carolina/46130/2003		SQN	NNT	NQT	NIS		NSS	NGT	NGS
A/swine/North Carolina/901/2003		SQN	NNT	NQT	NIS		NSS	NGT	NGS
A/swine/North Carolina/34562/2003 2003// N		SQN	NNT	NQT	NIS		NSS	NGT	NGS
A/swine/North Carolina/12869/2003		SQN	NNT	NQT	NIS		NSS	NGT	NGS
A/swine/North Carolina/26292/2003		SQN	NNT	NQT	NIS		NSS	NGT	NGS
A/swine/North Carolina/35002/2003		SQN	NNT	NQT	NIS		NSS	NGT	NGS
A/swine/North Carolina/38767/2003		SQN	NNT	NQT	NIS		NSS	NGT	NGS
A/swine/North Carolina/42577/2003		NQN	NNT	NQT	NIS		NSS	NGT	NGS
A/swine/North Carolina/43110/2003		SQN	NNT	NQT	NIS		NSS	NGT	NGS
A/swine/Haseluenne/IDT2617/2003		---	---	---	---		---	NGT	NGS			NFS
A/swine/Haseluenne/IDT2617/2003	NQT	NQS	NNT	NQT	NIS		SSP	NGT	NGS			NFS
A/swine/Haseluenne/IDT2617/2003	NQT	NQS	NNT	NQT	NIS		SSP	NGT	NGS			NFS
A/swine/Chonburi/NIAH9469/2004		NQS	NNT	NQT	NIS		NSS	NGT	NGS			NFS
A/swine/Chonburi/NIAH977/2004		NQS	NNT	NQT	NIS		NSS	NGT	NGS			NFS
A/swine/North Carolina/7386/2004		SQN	NNT	NQT	NIS		NSS	NGT	NGS
A/swine/Iowa/00239/2004	NHT	NQN	NNT	NRT	NIS		NSS	NGT	NGS
A/swine/Ontario/23866/04	NHS	NQN	NNT	NRT	NIS		NSS	NGT	NGS						35NHS
A/swine/Ontario/11112/2004	NHS	NQN	NNT	NRT	NIS		NSS	NGT	NGS
A/swine/Spain/53207/2004	NQT	NQS	NNT	NQT	NIS		SSS	NGT	NGS
A/swine/Tianjin/01/2004	NYT	NQR	NST	NQT	NIN		NSS	NGT	NGS
A/swine/Ohio/75004/2004	NYS	SQS	NNT	NQT	NIG		NSS	NGT	NGS
A/swine/Korea/CAN01/2004	NHS	NQN	NNT	NRT	NIS		NSS	NGT	NGS
A/swine/Italy/53949/2004	NQT	NQS	NNT	NQT	NIS		SSS	NGT	NGS
A/swine/Italy/65296/2004	NQT	NQS	NNT	NQT	NIS		SSS	NGT	NGS
A/swine/Italy/247578/2004	NQT	NQS	NNT	NQT	NIS		SSS	NGT	NGS
A/swine/Greven/IDT2889/2004	NQT	NQS	NNT	NQT	NIS		SSF	NGT	NGS
A/swine/Chonburi/NIAH589/2005	NQT	NQR	NNT	NQT	NIS		NSS	NGT	NGS			NFS
A/swine/ChachoeNGSao/NIAH587/2005	NQT	NQR	NNT	NQT	NIS		NSS	NGT	NGS			NFS
A/swine/Chonburi/05CB1/2005		NRS	NNT	NQT	NIN		NSS	NGT	NGS			NFS
A/swine/Shanghai/1/2005	NHS	NRN	NST	NQT	NIS		NSS	NGT	NGS			NFS
A/swine/Korea/CAS08/2005	NHT	NQN	NNT	NRT	NIS		NSS	NGT	NGS
A/swine/NC/00573/2005	NHT	NKR	NST	NYT	NIS		NSS	NGT	NGS
A/swine/IL/00685/2005	NHT	NKR	NST	NYT	NIN		NSS	NGT	NGS
A/swine/Chonburi/NIAH589/2005	NQT	NQR	NNT	NQT	NIS		NSS	NGT	NGS
A/swine/ChachoeNGSao/NIAH587/2005	NQT	NQR	NNT	NQT	NIS		NSS	NGT	NGS
A/swine/Illinois/40043/2005	NHT	NQN	NNT	NRT	NNS		NSS	NGT	NGS
A/swine/North Carolina/41265/2005		SQN	NNT	NQT	NIS		NSS	NGT	NGS
A/swine/Texas/36440-2/2005	NHT	SQN	NNT	NRT	NIS		NSS	NGT	NGS
A/swine/Shanghai/3/2005	NHS	SQN	NST	NQT	NIS		NSS	NGT	NGS			NFS
A/swine/Shanghai/2/2005	NHS	SQN	NST	NQT	NIS		NSS	NGT	NGS			NFS
A/swine/Cotes d'Armor/016007/2005	NQT	NQS		NQT	NIS		SSS	NGT	NGS			NFS
A/swine/Thailand/HF6/2005		NRS	NNT	NQT	NIS		NSS	NGT	NGS			NFS
A/swine/Cotes d'Armor/0227/2005	NQT	NQS	NNT	NQT	NIS		SSS	NGT	NGS			NFS
A/swine/Henan/01/2006	NYT	SQN	NST	NQT	NIN	NNT	NSS	NGT	NGS							NWS		NTT
A/swine/Cotes d'Armor/0190/2006	NQT	NQS	NNT	NQT	NIS		SSS	NGT	NGS			NFS
A/swine/Cotes d'Armor/002007/2006	NQT	NQS	NNT	NQT	NIS		SSS	NGT	NGS
A/swine/Chonburi/06CB2/2006		NQS	NNT	NQT	NIN	NNT	NSS	NGT	NGS			NFS
A/swine/Ohio/C62006/2006		SQN	NNT	NQT	NIS		NSS	NGT	NGS
A/swine/Ohio/K1130/2006	NHT	SQN	NNT	NHT	SIN	NNT	NSS	NGT	NGS					NTT		NWS
A/swine/Ohio/K1207/2006	NHT	SQN	NNT	NHT	SIN	NNT	NSS	NGT	NGS
A/swine/Cotes d'Armor/0136_18/2006	NQT	NQS	NNT	NQT	NIS		SSS	NGT	NGS			NFS
A/swine/Hungary/19774/2006	NQT	NQS	NNT	NQT	NIS		SSP	NGT	NGS			NFS
A/swine/Ennigerloh/IDT5803/2006	NQT	NQS	NNT	NQT	NIS		SSP	NGT	NGS
A/swine/Minnesota/07002083/2007	NHT	SQN	NRT	NHT	NIN	NNT	NSS	NGT	NGS					NTT		NWS
A/swine/Ohio/24366/2007	NHS	SQN	NNT	NQT	NIS		NSS	NGT	NGS
A/swine/OH/511445/2007	NHS	SQN	NNT	NQT	NIS		NSS	NGT	NGS
A/swine/Fujian/204/2007		SQN	NNT	NQT	NIS		NSS	NGT	NGS
A/swine/Zhejiang/1/2007		SQN	NNT	NQT	NIS		NSS	NGT	NGS
A/swine/Germany/SIV05/2007	NQT	SQN	NNT	NQT	NIS		SSP	NGT	NGS			NFS
A/swine/Kansas/77778/2007		SQN	NNT	NQT	NIS		NSS	NGT	NGS
A/swine/Hong Kong/NS1179/2007		SQN	NNT	NQT	NIS		NSS	NGT	NGS
A/swine/Shandong/62/2008		SQN	NNT	NQT	NIS		NSS	NGT	NGS
A/swine/Fujian/58/2008		SQN	NNT	NQT	NIS		NSS	NGT	NGS
A/swine/Ratchaburi/NIAH101942/2008		SQN	NNT	NQT	NIS		NSS	NGT	NGS			NFS
A/swine/Guangdong/02/2008	NHS	SQN	NNT	NQT	NIS		NSS	NGT	NGS			NFS
A/swine/Shandong/187/2008		SQN	NNT	NQT	NIS		NSS	NGT	NGS
A/swine/Shandong/128/2008		SQN	NNT	NQT	NIS		NSS	NGT	NGS
A/swine/Beijing/26/2008		SQN	NNT	NQT	NIS		NSS	NGT	NGS
A/swine/Beijing/21/2008		SQN	NNT	NQT	NIS		NSS	NGT	NGS
A/swine/Shandong/692/2008		SQN	NNT	NQT	NIS		NSS	NGT	NGS
A/swine/Shandong/443/2008		SQN	NNT	NQT	NIS		NSS	NGT	NGS
A/swine/Shandong/1012/2008		SQN	NNT	NQT	NIS		NSS	NGT	NGS
A/swine/Germany/SIV04/2008	NQT	NQS	NNT	NQT	NIS		SSP	NGT	NGS			NFS
A/swine/Guangdong/07/2008	NHS	SQN	NNT	NQT	NIS		NSS	NGT	NGS			NFS
A/swine/Guangdong/09/2008	NHS	SQN	NNT	NQT	NIS		NSS	NGT	NGS			NFS
A/swine/Alberta/OTH-33-8/2009		NQS	NNT	NQT	NIS		NSS	NGT	NGS			NFS
A/swine/Indiana/27007/2009		NQS	NNT	NQT	NIS		NSS	NGT	NGS			NFS
A/swine/Hong Kong/NS29/2009		SQN	NNT	NQT	NIS		NTS	NGT	NGS
A/swine/Guangdong/2/2009	NHS	SQN	NNT	NQT	NIS		NSS	NGT	NGS			NFS
A/swine/Hubei/S1/2009		SQN	NNT	NQT	NIS		NSS	NGT	YGS						186NGT	171NST	143NHS	8个
A/swine/4/Mexico/2009		NQS	NNT	NQT	NIS		NSS	NGT	NGS			NFS
A/swine/Alberta/OTH-33-25/2009		NQS	NNT	NQT	NIS		NSS	NGT	NGS			NFS
A/swine/Alberta/OTH-33-1/2009		NQS	NNT	NQT	NIS		NSS	NGT	NGS			NFS
A/swine/Alberta/OTH-33-2/2009		NQS	NNT	NQT	NIS		NSS	NGT	NGS			NFS			369NGS
A/swine/Alberta/OTH-33-3/2009		NQS	NNT	NQT	NIS		NSS	NGT	NGS			NFS
A/swine/Alberta/OTH-33-23/2009		NQS	NNT	NQT	NIS		NSS	NGT	NGS			NFS
A/swine/Alberta/OTH-33-24/2009		NQS	NNT	NQT	NIS		NSS	NGT	NGS			NFS
A/swine/Alberta/OTH-33-7/2009		NQS	NNT	NQT	NIS		NSS	NGT	NGS			NFS
A/swine/Alberta/OTH-33-14/2009		NQS	NNT	NQT	NIS		NSS	NGT	NGS			NFS
A/swine/Alberta/OTH-33-21/2009		NQS	NNT	NQT	NIS		NSS	NGT	NGS			NFS
A/swine/Alberta/OTH-33-22/2009		NQS	NNT	NQT	NIS		NSS	NGT	NGS			NFS
A/swine/Guangdong/05/2009	NHS	SQN	NNT	NQT	NIS		NSS	NGT	NGS			NFS
A/swine/MN/23506/2009	NHT	SQN	NNT	NRT	NIS		NSS	NGT	NGS
A/swine/Guangdong/06/2009	NHS	SQN	NNT	NQT	NIS		NSS	NGT	NGS			NYS
A/swine/Hong Kong/NS613/2009		NQS	NNT	NQT	NIS		NSS	NGT	NGS	NGT			NWS
A/swine/Argentina/SAGiles-31215/2009		NQS	NNT	NQT	NIS		NSS	NGT	NGS			NFS
A/swine/Hong Kong/1105/2009		NQT	NNT	NQT	NIS		NSS	NGT	NGS
A/swine/Guangdong/07/2009	NHS	SQN	NNT	NQT	NIS		NSS	NGT	NGS			NFS
A/swine/Hong Kong/1422/2009		NQS	NNT	NQT	NIS		NSS	NGT	NGS				NWS
A/swine/Singapore-Q/M168/2009		NQS	NNT	NQT	NIS		NSS	NGT	NGS			NFS
A/swine/Hong Kong/NS1071/2009		NQS	NNT	NQT	NIS		NSS	NGT	NGS				NWS
A/swine/Hong Kong/NS1075/2009		NQS	NNT	NQT	NIS		NSS	NGT	NGS				NWS
A/swine/Hong Kong/1532/2009		NQS	NNT	NQT	NIS		NSS	NGT	NGS				NWS
A/swine/Hong Kong/NS1054/2009		NQS	NNT	NQT	NIS		NSS	NGT	NGS				NWS
A/swine/Hong Kong/NS1065/2009		NQS	NNT	NQT	NIS		NSS	NGT	NGS				NWS
A/swine/Hong Kong/1539/2009		NQS	NNT	NQT	NIS		NSS	NGT	NGS				NWS
A/swine/Hong Kong/1535/2009		NQS	NNT	NQT	NIS		NSS	NGT	NGS				NWS
A/swine/Guangdong/09/2009		SQN	NNT	NQT	NIS		NSS	NGT	NGS			NFS
A/swine/Osaka/1/2009		NQS	NNT	NQT	NIS		NSS	NGT	NGS			NFS
A/swine/Hong Kong/NS1583/2009		NQS	NNT	NQT	NIS		NSS	NGT	NGS			NFS
A/swine/Hong Kong/2299/2009		NQS	NNT	NQT	NIS		NSS	NGT	NGS			NFS
A/swine/Thailand/CU-RA4/2009		NQS	NNT	NQT	NIS		NSS	NGT	NGS			NFS
A/swine/Thailand/CU-RA9/2009		NQS	NNT	NQT	NIS		NSS	NGT	NGS			NFS
A/swine/Guangdong/11/2009	NHS	SQN	NNT	NQT	NIS		NSS	NGT	NGS			NFS
A/swine/Taiwan/TD-4119B2/2009		NQS	NNT	NQT	NIS		NSS	NGT	NGS			NFS
A/swine/Hong Kong/2433/2009		NQT	NNT	NQT	NIS		NSS	NGT	NGS
A/swine/Hong Kong/2481/2009		NQS	NNT	NQT	NIS		NSS	NGT	NGS	NGT			NWS
A/swine/IL/32974/2009		NQS	NNT	NQT	NIS		NSS	NGT	NGS			NFS
A/swine/NC/34543/2009		NQS	NNT	NQT	NIS		NSS	NGT	NGS			NFS
A/swine/Italy/290271/2009		NQS	NNT	NQT	NIS		NSS	NGT	NGS			NFS
A/swine/Thailand/CU-RA20/2009		SQN	NNT	NQT	NIS		NSS	NGT	NGS			NFS
A/swine/Thailand/CU-RA29/2009		NQS	NNT	NQT	NIS		NSS	NGT	NGS			NFS
A/swine/Hong Kong/NS1809/2009		NQS	NNT	NQT	NIS		NSS	NGT	NGS			NFS
A/swine/Hong Kong/NS1810/2009		NQS	NNT	NQT	NIS		NSS	NGT	NGS			NFS
A/swine/Italy/85437/2009		NQS	NNT	NQT	NIS		NSS	NGT	NGS			NFS
A/swine/Italy/85429/2009		NQS	NNT	NQT	NIS		NSS	NGT	NGS			NFS
A/swine/NC/34752/2009		NQS	NNT	NQT	NIS		NSS	NGT	NGS			NFS
A/swine/IA/35572/2009		NQS	NNT	NQT	NIS		NSS	NGT	NGS			NFS
A/swine/IA/35573/2009		NQS	NNT	NQT	NIS		NSS	NGT	NGS			NFS
A/swine/Hong Kong/3001/2009		SQN	NNT	NQT	NIS		NSS	NGT	NGS
A/swine/Hong Kong/2885/2009		NQS	NNT	NQT	NIS		NSS	NGT	NGS			NFS
A/swine/Hong Kong/2886/2009		NQS	NNT	NQT	NIS		NSS	NGT	NGS			NFS
A/swine/Hong Kong/2894/2009		NQS	NNT	NQT	NIS		NSS	NGT	NGS			NFS
A/swine/Hong Kong/2974/2009		NQS	NNT	NQT	NIS		NSS	NGT	NGS			NFS
A/swine/Hong Kong/2995/2009		NQS	NNT	NQT	NIS		NSS	NGT	NGS			NFS
A/swine/Hong Kong/2896/2009		NQT	NKT	NQT	NIS		NSS	NGT	NGS			NFS
A/swine/Hong Kong/2990/2009		NQT	NKT	NQT	NIS		NSS	NGT	NGS
A/swine/IL/10-001551-1/2009		NQS	NNT	NQT	NIS		NSS	NGT	NGS			NFS
A/swine/IL/10-001551-2/2009		NQS	NNT	NQT	NIS		NSS	NGT	NGS			NFS
A/swine/IL/10-001550/2009		NQS	NNT	NQT	NIS		NSS	NGT	NGS			NFS
A/swine/OR/10-004060/2009		SQN	NNT	NQT	NIS		NSS	NGT	NGS
A/swine/Thailand/CU-RA114/2010		NQS	NNT	NQT	NIS		NSS	NGT	NGS			NFS
A/swine/Thailand/CU-RA15/2010		NQS	NNT	NQT	NIS		NSS	NGT	NGS			NFS
A/swine/Thailand/CU-RA75/2010		NQS	NNT	NQT	NIS		NSS	NGT	NGS			NFS
A/swine/Thailand/CU-RA204/2010		NRS	NNT	NQT	NIS		NSS	NGT	NGS			NFS
A/swine/Hong Kong/189/2010		NQS	NNT	NQT	NIS		NSS	NGT	NGS			NFS
A/swine/Hong Kong/201/2010		NQS	NNT	NQT	NIS		NSS	NGT	NGS			NFS
A/swine/IL/3910/2010		NQS	NNT	NQT	NIS		NSS	NGT	NGS			NFS
A/swine/Guangdong/1/2010		NQS	NNT	NQT	NIS		NSS	NGT	NGS	NGT			NWS
A/swine/IL/5265-1/2010		NQS	NNT	NQT	NIS		NSS	NGT	NGS			NFS
A/swine/IL/5265-2/2010		NQS	NNT	NQT	NIS		NSS	NGT	NGS			NFS
A/swine/MN/8761/2010		NQS	NNT	NQT	NIS		NSS	NGT	NGS			NFS
A/swine/MN/8762-1/2010		NQS	NNT	NQT	NIS		NSS	NGT	NGS			NFS
A/swine/MN/8762-2/2010		NQS	NNT	NQT	NIS		NSS	NGT	NGS			NFS
A/swine/IL/12660/2010		NQS	NNT	NQT	NIS		NSS	NGT	NGS			NFS
A/swine/NC/13598/2010		NQS	NNT	NQT	NIS		NSS	NGT	NGS			NFS
A/swine/IN/17311/2010		NQS	NNT	NQT	NIS		NSS	NGT	NGS			NFS
A/swine/IL/17315-1/2010		NQS	NNT	NQT	NIS		NSS	NGT	NGS			NFS
A/swine/IL/17315-3/2010		NQS	NNT	NQT	NIS		NSS	NGT	NGS			NFS
A/swine/MO/15534/2010		NQS	NNT	NQT	NIS		NSS	NGT	NGS			NFS
A/swine/MO/17314/2010		NQS	NNT	NQT	NIS		NSS	NGT	NGS			NFS
A/swine/NC/19646/2010		NQS	NNT	NKT	NIS		NSS	NGT	NGS			NFS
	44	50	58	63	68	70	88	146	235	341	365	386	398	434	449	455
Number of strains	69	224	327	330	320	5	304	332	331	3	1	110	11	2	2	8
Conservation (%)	20.7831	67.4699	98.494	99.3976	96.3855	1.50602	91.5663	100	99.6988	0.903614	0.301205	33.1325	3.31325	0.60241	0.60241	2.40964
												After april 2009, 79.3%
Possible human seasonal influenza viruses isolated from swine were highlighted in red	3 strians
The sequence in each unit of table represents the corresponding sequon of each site. The potential glycosites were highlighted by filling the units in yellow.

## Sheet: Others
Potential glycosites on NA in swine influenza A/H1N1 viruses
Location	Stalk						Head
Strains	44	50	58	63	68	70	88	146	235	341	365	386	398	434	449	455	Note
A/cat/IA/26991/2009		NQS	NNT	NQT	NIS		NSS	NGT	NGS			NFS
A/cat/Italy/304678-1/2009		NQS	NNT	NQT	NIS		NSS	NGT	NGS			NFS
A/cat/Italy/304678-2/2009		NQS	NNT	NQT	NIS		NSS	NGT	NGS			NFS
A/cat/OR/29573/2009		NQS	NNT	NQT	NIS		NSS	NGT	NGS			NFS
A/cat/PA/30187/2009 2009/11/07		NQS	NNT	NQT	NIS		NSS	NGT	NGS			NFS
A/ferret/OR/23775/2009		NQS	NNT	NQT	NIS		NSS	NGT	NGS			NFS
A/ferret/OR/27004-3/2009		NQS	NNT	NQT	NIS		NSS	NGT	NGS			NFS
A/ferret/OR/27004/2009		NQS	NNT	NQT	NIS		NSS	NGT	NGS			NFS
A/giant anteater/Tennessee/UTCVM07-733/2007	NHT		NST	NHT			NSS	NGT	NGS					NTT		NWS
The sequence in each unit of table represents the corresponding sequon of each site. The potential glycosites were highlighted by filling the units in yellow.
